# Supplementary material for: Cell Type-Specific Pherophorins of Volvox carteri Reveal Interplay of Both Cell Types in ECM Biosynthesis
Source: MDPI journal article supplement (doi:10.3390/cells12010134), 2022-12-29
Supplement: s1 [file s1]

## Supplemental Figure S2

### Sequence of the chimeric gene *ssg:yfp* as it is present in the vector pSSG-YFP

**GAATTC**ACATGGCGAAGTATAAGCATTGGATGGGGCTGGCGGCCGAGCAAGCGGGCAGGAAGGAGGTG  
CTCCCGCACATCACAATGTTTATCCACGTTTCGGCGAATTGCAAGCTTATGCAGTTTAGGCTTTGCTG  
TTGGGCACTGGCGGCTAACAGAGCGCGTAAGGGACGGCTTTATATACCTAGGGAGGAGCGAGTATGCC  
CCTGCTGCGGCACTGATAGCCACATCGAGGATGAGAAACACATTTTGGCTGGACTGTCCGGTTTACGAC  
GGAATCAGATCTGATATGGGCTTTCCACGCTTCGAACATATGAAGGACGCTATGAAGTGGAACCTGG  
ACGCCTGGCAAGAATGCTGGAACGTATATGGTCTCACCGCAACTCTATCGTTCCCTTTGGTCGTTAGT  
ATACTTCATTACTTGTTCGTTGGAAGTGCAGGTTAGGATGGTGCTTATAGGCGATTTGGCAGCCCTT  
GAGCCCTCGGCTCGTACTAGGGTGGTTTGCAGGTACGGGGAACGCACCCACGACCATGTAACAACAAC  
AACAATACATACGTGCCGTCTTCCCTGAAGCATATTTTCCCCACGATGAATCGAATTATGACAAAGT  
CAATATCAGGTGAACCATACGAACGGCGCCTCTTCGTGATGGGGCGACGCAGTGAAGTTCGCGCGA  
GGGAAACGCCACCCCATAGAACGCCTGCAGAAGCTACAGCACGGCGGGCCGTAAAATGGAGTGTGGTT  
TTGGTCCCCGACAACGATTACATTGACATGCAAGCAGCGGGTTGATTGCAAAGCTCAAGTTCATGCGA  
CATCATCATTTGTATTTGACGCACATCGTGGCCGTTTTCCTCCTGAGGAATGAGAACGATCAGGAA  
GCAAGCACGAACTGACGCTGACTGTTGTTGCTTGGGGTGCAGTGCAGCAACACATGCAACCCCACT  
TCAAGGTCCAATTATGAATGCGGGGATGGGGTGGTAGGCGCGGCAGCGAGTATGCGCGTATCGGCGC  
CCGGCTGGGCATCAGCCTGTTTGAGACGCCGTGCCATGCCGCTCCGCGCGGGTGCTTCGTTGGTCCAT  
ACGTCTCGACTGGAATGTGTGTAGTCACAACTTCTGCCACATTCGATCTCCTTGGTCTTTGTAACACT  
TTTGGGCGAGCAAATTTTAATCACTTTTGTGTCGCAAGCGAAGGTATGGACTGGGCTTTCTAAGTCC  
CGTTTCAAAGCACATCTTTCGGAAGAAAAGGATACGAAAAGTTTTCATTTACGGCCGCATGTGCTAT  
GTGGGTAGATTTTGCAGTGGCAGTTCGCAATTCGACAACATGCCTTAGAAAATAAAATTAAGCTCCA  
AGCCAGGGCCGAAATAGAATACTGTCTATGTCTCGTGCAATCACCGGCAATTGAAGGAAGCAAGAAG  
CTATTGAAATTGACCCTGAGATTCCCTTTGAACGACTTATTCTCGATTGTTACGGCAGTCGCCACGTC  
AAACTGCCGCCGTTTCATCAGCAGTCAGGGCAAGCTAGCGTGAAAAACAGTAACGCGCCGTATCAGTAG  
TACATGTTTGAACGGCGTTTTTGCTTGGATAAAATATGAAGTTTTCTTTTGGCAAGCAGACCTTTGGT  
GCATCACCTTCTTTATAAGCAATTCATCGCTTGCAACGCACATACTAGCCAACTTCTTTTAGCGATA  
TACTTATTGGTATTGTTCTAGTACTTCTATGAACGTCGACTGTGTCCAATTGTGTTCAACTAGGATT  
AAGCGTGCCACGTCAGCAGATAGACTGCTAGTACTGCTGTTCTCCCGTGTATGACTACGGTACTCTGA  
AAAGGCGTTAACGCCCTCATATTAACGTAAAGGTAACGTAGATATCAGTTGCTAAAATTACCTAGCATT  
AGATTATGTTGCAAAACGGATCAATACGTATCGGATAGGGATGTGGCGAAATTGCACGACGCTCGGAA  
TGAAAGGTAGAATGCGTAAATGTTCTTACCTTTCCCTAGACTGCGAAGAAACAAGCAAATGATGACTT  
GATCTATTTATTTTATCCAAAGGCGCAATATCCGACGTCACATCAACCGAGCACTCCATCCAAGTTA  
GCCATTGAAGCAGGAGCAGCAGCACAAACGTAATCACCTATGAGGATATAAGTCTCATCATATTTT  
AAACTATATTATACTGCACTCAGGATGACTGCCGGAAGGGAAGTGAACCGCCGGCAATCTTTACGAAG  
TAGCTGGCCAAATCCATAAGCCTCATGAAATTATTAAATCAAATTAACCTCTGATTAAGTTAACTTCA  
TCGCGGATGTCACCGCGTACGTTGGACTTGTCGTTACCCATCAGCATTGCTTACTGTAACTTGGCGG  
AACGTTACAATCACATCCCAGGAGGCCACCATCCTCAATATACTCTATTTTATGGTGTTTTAAAGCACA  
TTAGTTGGCAGCTCGCCTTCTTTCCCGCGCTCGCGCCACCGCTCTGTACACCGTCTGGACATGCCG  
TACATTATTCGCCAGGGAGGGCGCGTTGCAAGCCGTCATAGAAGGATCGGGTCTGCGATTGCATAAT  
CGTAGCTGCACCCCTTACAGGCTGAAGAGTTACGGCCTCGTGGGTTGCATAATTGGAATCCCTTTTTCA  
CGAAAAGGCGTGGAGTGGTCCGTTATTCCATTTCTGTACGACTCGAGACTTGGCTACGTAAGTCTGC  
ATGTGATGGATTACGCGACATCGCTAGATTGTTTGATGTTGCATAATTGGCCAACATCTCAGCATTT  
TAGCTGGAGAGGGTAGCTGGCAGACGCTTATCATGTCGCGGTTCCCTCCGTGCGCAGTGGTGCTCACC  
GGGACCAATTTTATACGCAAAGATGCTCTAAGCTGCTGCTCGTGGCGCTTTTTTGGCGCCATAGCAGTGG  
TTGCTACGAGTGCTGTGAGTGCCTGCTCCTTCGACCCTTACGATGCAACGTAATTTTCGCTACC  
TGAGTTAACCTGCTTCTTTCTGCCTATTCTTTTGCTTATAACAGAGGTAAGTCAACCTCAACGGAAGGT  
AAGACGCGATTGCTTAAGATGTGCTTCCTCATCGTGAGTTACTACTGAAAGATGTGGTTTTGCAAGTG  
CCATCGCATGCGCTAAGTTTTTGTATGTTAGATGTCGGAGCCAAAATTTACATCGTTTTTATCTTTGTC  
GGCAGGTCTCTTTTGAACAACGACGACCCGAACGCCTTCCCTTACTGCAAAATGTACTTATCGTCAGCG  
CCGGAGCCCATACCGCCTGAAGTATGTTGGCGCCGAGAACAACATAAGGGCAATGACTGGCTGTGCT  
ACAGCATTTGTCCTTGACACCACGGGCACTGTTTGCCAGACAGTTCCGTTGACGGAGCCTTGCTGCAGC  
GCTGACCTGTACAAGATTGAGTTTGACGTCAATAAGTGGTGTGATCCAGGCACCTTCTGTTCTTACC

EcoRI

EcoRV

XhoI

start

CAGGCATGTCTGTAGGCACCTTGCCTGGAAAGGCAATTTCAATCTTGCACACCCCTGTCTGGCTCTTC  
GTAGCTATGAGTTGGCATTCAATTCCTTCCATCGGCCAAGTAGCCCTTGCCCTATCTCTATCCAGT  
CAACATCCTTGCGGCCTAAAGTAAGCTCATGGTCCCAGGCCTTGTGGCCCACTGTTACACAGCCTTAC  
TAACTGACGCACGTTGTTCCCTTGCCATCCTTTTCCATGGCGCACGTTACAGAACCCCTCCTGCAAGGG  
CACTGTTACACGTGCTATGGTGTTCAGGGCATTGACAGGACTGTTGGCGGCGTACGTGTGTTGGAGT  
CCATCAGCACCGTCGGCATTGATGACGTCACCGGTGTTCCGGGCGCGGCCATCCTTCGCATCGTGAAG  
GACCTTGCCCTCCCGTACAGCGTCGTGGCTTCCTTCTTGCCCTAGTAAGTTGGGACTAAACTCAAATTT  
TCGTTCTTGCCAGCAGCTTGATGATTTTTCTTCGTGGGGGAAGCGTCACGGTTTGCGATCGATGCCGA  
TGTATAAAATGTTTTTTTTTGTCTATCTCGCTTTTAGCCTACGCTTTCTTAATCAGTTTTTTTGGGTC  
TTCAGTGTGTTTTGTGGTCCGTCCCGGCATGTGGACGTTCTGTGCCGAAGTTATCTTACACCGAGGGA  
TGTGAGGGATGTAAGAAAGGATGTTTGTACCAGACGAATCGTCCACTTCCCATCCAGAGCGCATACAG  
CTGCTGCTTTGAATAGTTGCCATTGCGTTTTTGGCGGTTTTGCCATTTTTCCAAGGATGCTATTGTCAA  
TCGCGTCGGACAAGTTAAGTCTTTTGCACCATAACGAACTTTCCAGCCGTTTAGATGTCAAATAGATA  
AAGAAGAATCCTCTTTACGGCGAAGCTCTCACGCCAAAACAAACGTTTTCACTTGAAAGACATTTTTTC  
TATGATTGCACTTTCTTGACGGCTGCTCTATGTCTTCCTGTCCCTGCTTGTTCCTAATCCCTACCC  
TACCTGCCTCCCTACCTGCCTCCCTACCTGCCTCCCAACCTCCCTCCCTACCTGCCTCCCTCCCTGCC  
CATATCCTTGACAGATGGCTTGCCGGTCTGCATCAACAGGGTGCCCGGCTCGTGCACGTTCCCGGAAC  
GTTTCATGGACGTTAACGGCACTGCCTCGTACTCGGTCTTCAACTCTGATAAGGATTGCTGCCCAACCG  
GCCTTTCCGGCCCCAATGTCAATCCAATTGGCCCGGCACCCAACAACAGCCGTTGCCACCAAGCCCG  
CAGCCAACAGCAAGCTCGCGGCCACCAAGCCCGCCGCCAGCCC**GCGGCCGC**CAAGCCCGCCGCTCC  
CTCG**CCCAGCCCGCGCCCCACCGCCGCGCCCCCTCCACCCCCACCGCCGCCCCCCCCAAGCCCC**  
**CACCGCCGCCACCGCCTCCCCACCTCCTCCTCCACCACCACCGCCACCTCTCCCTCCCCGCCACGC**  
**AAGCCACCGTCCCCATCCCCACCTGTTCCCCACCGCCATCACCACCGAGCGTCTTGCCCGCTGCTAC**  
**CGGCTTCCCCTTCTGCGAGTGAGTGGCAACGGCTTCCCTTCTCTCTCACTTTTAAACGAACGTTCAA**  
**ACTG**TCAAACGCTACACCAGTACGAAGGATACACAACCTGCCGTATCATGGGCAAAGTATTTGTCTTC  
AGGTCCATATGTGGTTTTCGATACGTCGCTTAGTGCTTGACTATGCTATGCATGTTTTAGCTGCGCAGTG  
TCGTGCTGTGCTACATTAGTCATCCAGCGCTGCACAGTGTGTGCATGATTGACAAAAATACCCCT  
CGGCCATGCGCACCTTGCCCCGTCCAGCCACGTCCTACTTCCCTCAGATGTTCTGTGTACACCAACCC  
CCTGCTCGATCACAGAAATATCACAGCACGAACTGGACTGTTCCCTTGCTTTTACGATGTGCGCGCGCG  
CGCCTGTGTGTGCATATGTGTATATGTGTGTGCGAAATGTGGCGGCAATATCGCTTTTTTCTCTATTCCG  
AGGGAACAGCATCTGCCAAGGAGCACCCCTGTGTCTCATTTTCGCAAGTGTCTTGTAAACCCGTCCCA  
ACCCAAACCCACTCCGCGTCCCTCATGGACCCCCCCCCACGCGCCATGGGCCCCCTGGCCACATCCTG  
ATACAACCAAAGCTTGCCCTCTTGAGGTGCTATATGACCTGCTTTTCACTGACCCCTTACAACCCCAA  
AACTCACATCCTACGCGCCCTCCTCTTTTTTCCCCCGCGCCAGGTGCGTGTCCCGGTCCCCTTCCAGC  
TACCCATGGCGCGTGACCGTCGCCAACGTTTCCGCGGTACCATCTCTGGCGGCGCTGGCGAGCGCGT  
GTGCCTGAAGATTTTCGGTCGACAAC**GCGGCCGC**TGCCACCTGCAACAACGGCTGGGCGGGTGTGCTGCT  
CGGATGGACTGGAGAAGGTC**GAGCTC**TTTGCTAGTGAGTACCTCAGCGTTGCGGCGGCAATTTGTGTG  
AATGTGTGTTTGTGTGTGTGTGGGGGGGGGAATGGGGGGTGGGGGTGTAATGGCGGCGCGGGAGATT  
GGGATCACGGGACTGACACTACCATCAGATGGCTTTGGGGGAGAGGATGGGATTTTCGGGTGAACTGG  
AACAAGGATGTGTGTGTGTGTGTATGTGTGTATGTGTGTTGTTTCATGCTGCTCTAGCAGCTGCGGAAA  
CAGCTCCTGGGTGATGGGTGGCTTCCTAGGCACTACAGCTACGGGCTATGGCGAGCCCGTCATAGCAG  
CCTGCTGGGAAGCCGATGTGGTGCGTAACGTTGGTTCGCTTAGGAGGGGTCGTGGAGGGGTCGTGGAGG  
GGTCGTGGAGGGGTCGTGGAAGTATCGATGTTGCGTTTTGCGGTGACCCAGCGTGAAGAATAACAAATG  
CCAACAGTGTGCGAGTGTTATCAGGTGCAAAGTCCCTCCGCAGTGCTGATGCCTCCTCTTCAGCAGCAG  
CCTGCCCTACGCGATTACACGGTGGTTGAAGTGGTTGCTGGTTGGCGCCGCCAGCATTATATTTTAAC  
CACGTCAGGGCCTGATGCGCCGTGGGTTTTAGGAAGCAGCTTCTCGCCTGAAGGGAGGGGGAGACGGGT  
TCTGGGTTGGTTTGGTTCTGGTGCCCGCTAGGGTGAGAATTGCTGAAGGGCTGACGTGTACCAGGTCA  
TATGTACCCTAGTGGCGCGAAGTAAACAGACGAGCTAGGGAACATAACAATAACAACAGCAAATACAA  
TAAGCTTTAAACGATCTATTGATATGCGCTGCATGTGCGTGCGTATGTATGTGTGTATACGGCGATG  
CGAGTACGGCATCTTTCCATACTCTGGTCTTTAATCTCACCCCTGAAACACACCACCTTCGTTTGCGC  
GTGCATCCATGCGTGTGTGGTGTGGGCTGGCGTGGCCTAGTAAGTGGAAATGATTTCAAAGCCAAAAC  
AAGCTACCGGGATAGCATCAGTCTCTTCAATCATTCACCCGGTCTCCGCGTGTGGCGCTTGGGGGTAT  
GTTCCCACTGCCGCCACTGTCACCTGCTGAGCTGTGCGCATGTCGTAATAACGCCTCTGCACGCCAGC

**NotI**  
previous  
sequence  
gap

**NotI**  
**SacI**

CCGTGGTATCGTTTTCCG**GGATCC**CGCTGTCGGGTCTAAGAATGGCTTCCGTTGCTGGCGCTGCTCGC **BamHI**  
TCGAACGCGAGACCAAGTTAACTTTTACTCCTGGAGCAGAAGGTTTAGTAAAACAAGCTATTGCTGAA  
TATTTAGAA**GAATTC**AAATCAAGTGCTAAAGCTGCTTAATTAGTAATAATTTATATAATTTGGTGTCC **EcoRI**  
ACAACATACATAGCTGCCGGTTGCAACCACATCTACACCCACATATGTCTGTGCGCGTGCGTGTGCA  
CCTTGGGCTGCTTATGTGCTACCCTACGAATGTATTAACCTAGAGCCCCATTACATGTGCTCAACCA  
TGCCTACCAACACAACACCAACACATTTCCCCTTCGCACCCGTTCTCTGTTCTGAACCCACAG**ACGGC**  
AAGTGCAAGGGCTCCATTTTGCCGTTCACTCTGTCCAACACCGCGGAGATTAGGTCGTCATTCTCCTG  
GGACTCCACTCGCCCAGTCTCAAATTCACCCGCCTGGGCCTCACCTATGCTCAAGGTGTCGCCGGCG  
GCAGCCTCTGCTTCAACATCAAGGGTGCCGGCTGTACCAAGTTTGC**AGATCT**CTGTCTTGCCGCGCGG **BglII**  
TGCACCGTCGCGGTATTCAACAACCCCGACAACACATGTTGCCGCGGGTCGGCACCATCGCG**GGTAC** **KpnI**  
**CGGCGGAGGCGGTGGC**ATGAGCAAGGGCGAGGAGCTGTTACCGGCGTGGTGCCCATCCTGGTGGAGC **gly5**  
TGGACGGCGACGTGAACGGCCACAAGTTTCAGCGTGAGCGGCGAGGGCGAGGGCGACGCCACCTACGGC  
AAGCTGACCCTGAAGCTGATCTGCACCACCGGCAAGCTGCCCCGTGCCCTGGCCACCCCTGGTGACCAC  
CCTGGGCTACGGCCTGCAGTGCTTCGCCCGCTACCCCGACCACATGAAGCAGCACGACTTCTTCAAGA  
GCGCCATGCCCGAGGGCTACGTGCAGGAGCGCACCATCTTCTTCAAGGACGACGGTAACTACAAGACC  
CGCGCCGAGGTGAAGTTCGAGGGCGACACCCTGGTGAACCGCATCGAGCTGAAGGGCATCGACTTCAA **yfp**  
GGAGGACGGCAACATCCTGGGCCACAAGCTGGAGTACAACAGCCACAACGTGTACATCACCG  
CCGACAAGCAGAAGAACGGCATCAAGGCCAACTTCAAGATCCGCCACAACATCGAGGACGGCGGGCGTG  
CAGCTGGCCGACCACTACCAGCAGAACACCCCATCGGCGACGGCCCCGTGCTGCTGCCCGACAACCA  
CTACCTGAGCTACCAGAGCAAGCTGAGCAAGGACCCCAACGAGAAGCGCGACCACATGGTGTGCTGG  
AGTTCGTGACCGCCGCCGGCATCACCTGGGCATGGACGAGCTGTACAAG**GGTACC****TAA**AGCGTTTCG **KpnI, stop**  
CATGACGATGCAAAAAAAGGGTGGTGCAGCGCAACACCCCCCGTGGGTGTGTGGGTGTGTGTGCC  
GCGCAAGAAGATTGTGCGTGAGTGGATGTGCGCGGATGTGGGGGGGAAAACCGCCAGTCCCTTTCTTA  
TATGCTGCTACACATGACTGAGGTTGCTGCCGGGGAGGCGGAGGAGGCTTGTGGGTGTGGCGTCGGCG  
TCGATGCCAAGTCACCGCTGTGCCACTGCTGCGGCGGGCTTGGATAGCAGCAGCAGCGGCGCAGCAGC  
AGCAGCATCCGCAGCATCAGCAGCATAGGGACGCATGCATGCCTTTAGCCGGAATGGGAGGGCTGCGT  
GCTGCTTTTGCAACCGCAGGGGTGAAAGTAGGTAGTCTGCATAAATGATTAAGCACTGGTCAAATGT  
CGCTGAGATGAACATAACACGATTATATATGATATGATGCGCGACATGATTGTTGGATGCGGCCAGTA  
CTTTTTTCCGCTGCGCAGGTGTCAGTGTTGCACTTGGGTTTGATCCAGTTACGGGCCTCTCGGCGTCT  
ACCAAACGCAAATTGTCGTTAATTGATATTCTCTTGCTTTTTTGCGCATCTCGTCAAGTGAGGGCAGCG  
TCCCCCTCCTGTGCTGCTGCACTTGACGTGGCTGTTGGAATGTTCCGTGCATGGCCGCTGGCCCGAAC  
CATTTGTAGTTGAGTGACTACTGCGCTAACATTCAGTTATTTCTGTAATAATCACCATCATAATTATCA  
TCATCGCTACCTGCCTATGGCCGGGAAGTTGAGCAGGTTTTAACGTTTTACGTTCAATCCCGATGGCC  
CACGTCACGTGTAGCAGGCCTTTGCGTTCCCCTCTCTTGTAACCTATTTCTCATAG**GATATC**AAATTT **EcoRV**  
GGCTCATCTTTGCAGTGGAGTATTCCTACAAATAGAGGTGCATCTGCCAGATTTGGCAAATAGAGGTG  
CATCTGCCAGATTTGGCCGGTGGGGGGACCTTATTAACCGTCGTTAACCAG**GGATCC** **BamHI**

The vector pSSG-YFP carries a 8.8-kb fragment of *V. carteri* genomic DNA containing the *ssg185* gene including its 6 introns, a short linker sequence, which codes for 5 glycines (Gly5) and the coding sequence of *yfp* (mVenus). The chimeric gene is controlled by the original *ssg185* 5' and 3' flanking sequences, including the promoter region. The corresponding gene entry in the current *Volvox carteri* genome version 2.1 (Prochnik et al., 2010) in Phytozome 12.1.6 (Goodstein et al., 2012) is Vocar.0002s0564. The *yfp* (mVenus) gene has been codon-adapted for *C. reinhardtii* (Lauersen et al., 2015) but also works well in *V. carteri* (Tian et al., 2018; von der Heyde and Hallmann, 2020). Artificial *KpnI* and *BamHI* sites have been introduced to facilitate cloning. The background colors indicate the following sequence features: gray, *ssg185* promoter region, green, 5' and 3' UTRs of *ssg185*; blue, coding sequences of *ssg185*; turquoise, sequence coding for 5 glycines (Gly5); yellow, coding sequence of *yfp* (mVenus). Start and stop codons are highlighted (violet font). A previous sequence gap, which we closed, is also indicated (blue font). Relevant restriction sites are marked (bold, underlined).

## References

- Goodstein, D. M., Shu, S., Howson, R., Neupane, R., Hayes, R. D., Fazo, J., Mitros, T., Dirks, W., Hellsten, U., Putnam, N. et al.** (2012) Phytozome: a comparative platform for green plant genomics. *Nucleic Acids Res.* **40**, D1178-1186.
- Lauersen, K. J., Kruse, O. and Mussnug, J. H.** (2015) Targeted expression of nuclear transgenes in *Chlamydomonas reinhardtii* with a versatile, modular vector toolkit. *Appl. Microbiol. Biotechnol.* **99**, 3491-3503.
- Prochnik, S. E., Umen, J., Nedelcu, A. M., Hallmann, A., Miller, S. M., Nishii, I., Ferris, P., Kuo, A., Mitros, T., Fritz-Laylin, L. K. et al.** (2010) Genomic analysis of organismal complexity in the multicellular green alga *Volvox carteri*. *Science* **329**, 223-226.
- Tian, Y., Gao, S., von der Heyde, E. L., Hallmann, A. and Nagel, G.** (2018) Two-component cyclase opsins of green algae are ATP-dependent and light-inhibited guanylyl cyclases. *BMC Biol* **16**, 144.
- von der Heyde, B. and Hallmann, A.** (2020) Targeted migration of pherophorin-S indicates extensive extracellular matrix dynamics in *Volvox carteri*. *Plant J.* **6**, 2301–2317.
