# Supplementary material for: Cell Type-Specific Pherophorins of Volvox carteri Reveal Interplay of Both Cell Types in ECM Biosynthesis
Source: MDPI journal article supplement (doi:10.3390/cells12010134), 2022-12-29
Supplement: s1 [file s1]

## Supplemental Figure S7

### Genomic sequence of the *V. carteri* *ssg185* gene

**GAATTC**ACATGGCGAAGTATAAGCATTGGATGGGGCTGGCGGCCGAGCAAGCGGGCAGGAAGGAGGTG  
CTCCCGCACATCACAATGTTTATCCCACGTTCTGGCGAATTGCAAGCTTATGCAGTTTAGGCTTTGCTG  
TTGGGCACTGGCGGCTAACAGAGCGCGTAAGGGACGGCTTTATATACCTAGGGAGGAGCGAGTATGCC  
CCTGCTGCGGCACTGATAGCCACATCGAGGATGAGAAACACATTTTGGCTGGACTGTCCGGTTTACGAC  
GGAATCAGATCTGATATGGGCTTTCCACGCTTCGAACATATGAAGGACGCTATGAAGTGGGAACCTGG  
ACGCCTGGCAAGAATGCTGGAACGTATATGGTCTCACCGCAACTCTATCGTTCCCTTTGGTCGTTAGT  
ATACTTCATTACTTGTTCGTTGGAAGTGCAGGTTAGGATGGTGCTTATAGGCGATTTGGCAGCCCTT  
GAGCCCTCGGCTCGTACTAGGGTGGTTTGCAGGTACGGGGAACGCACCCACGACCATGTAACAACAAC  
AACAAATACATACGTGCCGTCTTCCCTGAAGCATATTTTCCCCACGATGAATCGAATTATGACAAAGT  
CAATATCAGGTGAACCATACGAACGGCGCCTCTTCGTGATGGGGCGACGCACTGACTTGATCCGCCGA  
GGGAAACGCCACCCCATAGAACGCCTGCAGAAGCTACAGCACGGCGGGCCGTAAAATGGAGTGTGGTT  
TTGGTCCCCGACAACGATTACATTGACATGCAAGCAGCGGGTTGATTGCAAAGCTCAAGTTCATGCGA  
CATCATCATTTGTATTTGACGCACATCGTGGCCGTTTTCCTCCTGAGGAATGAGAACGATCAGGAA  
GCAAGCACGAACTGACGCTGACTGTTGTTGCTTGGGGTGCAGTGCAGCAACACATGCAACCCCACT  
TCAAGGTCCAATTATGAATGCGGGGATGGGGTGGTAGGCGCGGCAGCGAGTATGCGCGTATCGGCGC  
CCGGCTGGGCATCAGCCTGTTTGAGACGCCGTGCCATGCCGCTCCGCGCGGGTGCTTCGTTGGTCCAT  
ACGTCTCGACTGGAATGTGTGTAGTCACAACTTCTGCCACATTCGATCTCCTTGGTCTTTGTAACACT  
TTTGGGCGAGCAAATTTTAATCACTTTTGTGTCGCAAGCGAAGGTATGGACTGGGCTTTCTAAGTCC  
CGTTTCAAAGCACATCTTTCGGAAGAAAAGGATACGAAAAGTTTTCATTTACGGCCGCATGTGCTAT  
GTGGGTAGATTTTGCAGTGGCAGTTCGCAATTCGACAACATGCCTTAGAAAATAAAATTAAGCTCCA  
AGCCAGGGCCGAAATAGAATACTGTCTATGTCTCGTGCAATCACCGGCAATTGAAGGAAGCAAGAAG  
CTATTGAAATTGACCCTGAGATTCCCTTTGAACGACTTATTCTCGATTGTTACGGCAGTCGCCACGTC  
AAACTGCCGCCGTTTCATCAGCAGTCAGGGCAAGCTAGCGTGAAAAACAGTAACGCGCCGTATCAGTAG  
TACATGTTTGAACGGCGTTTTTGCTTGGATAAAAATTATGAAGTTTTCTTTTGGCAAGCAGACCTTTGGT  
GCATCACCTTCTTTATAAGCAATTCATCGCTTGCAACGCACATACTAGCCAACTTCTTTTAGCGATA  
TACTTATTGGTATTGTTCTAGTACTTCTATGAACGTCGACTGTGTCCAATTGTGTTCAACTAGGATT  
AAGCGTGCCACGTCAGCAGATAGACTGCTAGTACTGCTGTTCTCCCGTGTATGACTACGGTACTCTGA  
AAAGGCGTTAACGCCCTCATATTAACGTAAAGGTAACGTAGATATCAGTTGCTAAAATTACCTAGCATT  
AGATTATGTTGCAAAACGGATCAATACGTATCGGATAGGGATGTGGCGAAATTGCACGACGCTCGGAA  
TGAAAGGTAGAATGCGTAAATGTTCTTACCTTTCCCTAGACTGCGAAGAAACAAGCAAATGATGACTT  
GATCTATTTATTTTATCCAAAGGCGCAATATCCGACGTCACATCAACCGAGCACTCCATCCAAGTTA  
GCCATTGAAGCAGGAGCAGCAGCACAAACGTAATCACCTATGAGGATATAAGTCTCATCATATTTT  
AAACTATATTATACTGCACTCAGGATGACTGCCGGAAGGGAAGTGAACCGCCGGCAATCTTTACGAAG  
TAGCTGGCCAAATCCATAAGCCTCATGAAATTATTAAATCAAATTAACCTCTGATTAAGTTAACTTCA  
TCGCGGATGTCACCGCGTACGTTGGACTTGTCGTTACCCATCAGCATTGCTTACTGTAACTTGGCGG  
AACGTTACAATCACATCCCAGGAGGCCACCATCCTCAATATACTCTATTTTATGGTGTTTTAAAGCACA  
TTAGTTGGCAGCTCGCCTTCTTTCCCGCGCTCGCGCCACCGCTCTGTACACCGTCTGGACATGCCG  
TACATTATTCGCCAGGGAGGGCGCGTTGCAAGCCGTCATAGAAGGATCGGGTCTGCGATTGCATAAT  
CGTAGCTGCACCCTTACAGGCTGAAGAGTTACGGCCTCGTGGGTTGCATAATTGGAATCCCTTTTTCA  
CGAAAAGGCGTGGAGTGGTCCGTTATTCCATTTCTGTACGACTCGAGACTTGGCTACGTAAGTCTGC  
ATGTGATGGATTACGCGACATCGCTAGATTGTTTGATGTTGCATAATTGGCCAACATCTCAGCATTT  
TAGCTGGAGAGGGTAGCTGGCAGACGCTTATCATGTCGCGGTTCCCTCCGTGCGCAGTGGTGCTCACC  
GGGACCAATTTTATACGCAAAGATGCTCTAAGCTGCTGCTCGTGGCGCTTTTTTGGCGCCATAGCAGTGG  
TTGCTACGAGTGCTGTGAGTGCCTGCTCCTTCGACCCTTACGATGCAACGTAATTTTCGCTACC  
TGAGTTAACCTGCTTCTTTCTGCCTATTCTTTTGCTTATAACAGAGGTAAGTCAACCTCAACGGAAGGT  
AAGACGCGATTGCTTAAGATGTGCTTCCCTCATCGTGAGTTACTACTGAAAGATGTGGTTTTGCAAGTG  
CCATCGCATGCGCTAAGTTTTTGTATGTTAGATGTCGGAGCCAAAATTTACATCGTTTTTATCTTTGTC  
GGCAGGTCTCTTTTGAACAACGACGACCCGAACGCCTTCCCTTACTGCAAAATGTACTTATCGTCAGCG  
CCGGAGCCCATACCGCCTGAAGTATGTTGGCGCCGAGAACAACATAAGGGCAATGACTGGCTGTGCT  
ACAGCATTTGTCCTTGACACCACGGGCACTGTTTGCCAGACAGTTCCGTTGACGGAGCCTTGCTGCAGC  
GCTGACCTGTACAAGATTGAGTTTGACGTCAATAAGTGGTGTGATCCAGGCACCCTTCTGTTCTTACC

EcoRI

EcoRV

XhoI

start

CAGGCATGTCTGTAGGCACCTTGCCTGGAAAGGCAATTTCAATCTTGCACACCCCTGTCTGGCTCTTC  
GTAGCTATGAGTTGGCATTCAATTCCTTCCATCGGCCAAGTAGCCCTTGCCCTATCTCTATCCAGT  
CAACATCCTTGCGGCCTAAAGTAAGCTCATGGTCCCAGGCCTTGTGGCCCACTGTTACACAGCCTTAC  
TAACTGACGCACGTTGTTCCCTTGCCATCCTTTTCCATGGCGCACGTTACAGAACCCCTCCTGCAAGGG  
CACTGTTACACGTGCTATGGTGTTCAGGGCATTGACAGGACTGTTGGCGGCGTACGTGTGTTGGAGT  
CCATCAGCACCGTCGGCATTGATGACGTCACCGGTGTTCCGGGCGCGGCCATCCTTCGCATCGTGAAG  
GACCTTGCCCTCCCGTACAGCGTCGTGGCTTCCTTCTTGCCCTAGTAAGTTGGGACTAAACTCAAATTT  
TCGTTCTTGCCAGCAGCTTGATGATTTTTCTTCGTGGGGGAAGCGTCACGGTTTGCGATCGATGCCGA  
TGTATAAAATGTTTTTTTTTGTCTATCTCGCTTTTAGCCTACGCTTTCTTAATCAGTTTTTTTGGGTC  
TTCAGTGTGTTTTGTGGTCCGTCCCGGCATGTGGACGTTCTGTGCCGAAGTTATCTTACACCGAGGGA  
TGTGAGGGATGTAAGAAAGGATGTTTGTACCAGACGAATCGTCCACTTCCCATCCAGAGCGCATACAG  
CTGCTGCTTTGAATAGTTGCCATTGCGTTTTTGGCGGTTTTGCCATTTTTCCAAGGATGCTATTGTCAA  
TCGCGTCGGACAAGTTAAGTCTTTTGCACCATAACGAACTTTCCAGCCGTTTAGATGTCAAATAGATA  
AAGAAGAATCCTCTTTACGGCGAAGCTCTCACGCCAAAACAAACGTTTTCACTTGAAAGACATTTTTTC  
TATGATTGCACTTTCTTGACGGCTGCTCTATGTCTTCCTGTCCCTGCTTGTTCCTAATCCCTACCC  
TACCTGCCTCCCTACCTGCCTCCCTACCTGCCTCCCAACCTCCCTCCCTACCTGCCTCCCTCCCTGCC  
CATATCCTTGCAATGGCTTGCCGGTCTGCATCAACAGGGTGCCCGGCTCGTGCACGTTCCCGGAAGT  
GTTTCATGGACGTTAACGGCACTGCCTCGTACTCGGTCTTCAACTCTGATAAGGATTGCTGCCCAACCG  
GCCTTTCCGGCCCCAATGTCAATCCAATTGGCCCGGCACCCAACAACAGCCCGTTGCCACCAAGCCCG  
CAGCCAACAGCAAGCTCGCGGCCACCAAGCCCGCCGCCAGCCCGCGCGCCGCAAGCCCGCCGCTCC  
CTCGCCCAGCCCGCGCCCCACCGCCGCGCCCCCTCCACCCCCACCGCCGCCCCCCCCAAGCCCC  
CACCGCCGCCACCGCCTCCCCACCTCCTCCTCCACCACCACCGCCACCTCTCCCTCCCCGCCACGC  
AAGCCACCGTCCCCATCCCCACCTGTTCCCCACCGCCATCACCACCGAGCGTCTTGCCCGCTGCTAC  
CGGCTTCCCCTTCTGCGAGTGAGTGGCAACGGCTTCCCTTCTCTCTCACTTTTAAACGAACGTTCAA  
ACTGTCAAACGCTACACCAGTACGAAGGATACACAACCTGCCGTATCATGGGCAAAGTATTTGTCTTC  
AGGTCCATATGTGGTTTTCGATACGTCGCTTAGTGCTTGACTATGCTATGCATGTTTAGCTGCGCAGTG  
TCGTGCTGTGCTACATTCAGTCATCCAGCGCTGCACAGTGTGTGCATGATTGACAAAAATACCCCT  
CGGCCATGCGCACCTTGCCCCGTCCAGCCACGTCCTACTTCCCTCAGATGTTCTGTGTACACCAACCC  
CCTGCTCGATCACAGAAATATCACAGCACGAACTGGACTGTTCCCTTGCTTTTACGATGTGCGCGCGCG  
CGCCTGTGTGTGCATATGTGTATATGTGTGTGCGAAATGTGGCGGCAATATCGCTTTTTTCTCTATTCCG  
AGGGAACAGCATCTGCCAAGGAGCACCCCTGTGTCTCATTTTCGCAAGTGTCTTGTAACCCGTCCCA  
ACCCAAACCCACTCCGCGTCCCTCATGGACCCCCCCCCACGCGCCATGGGCCCCCTGGCCACATCCTG  
ATACAACCAAAGCTTGCCCTCTTGAGGTGCTATATGACCTGCTTTTCACTGACCCCTTACAACCCCAA  
AACTCACATCCTACGCGCCCTCCTCTTTTTTCCCCCGCGCCAGGTGCGTGTCCCGGTCCCCTTCCAGC  
TACCCATGGCGCGTGACCGTCGCCAACGTTTCCGCGGTACCATCTCTGGCGGCGCTGGCGAGCGCGT  
GTGCCTGAAGATTTGCGTCGACAACGCGGCCGTGCCACCTGCAACAACGGCTGGGCGGGTGTGCTGT  
CGGATGGACTGGAGAAGGTCGAGCTCTTTGCTAGTGAGTACCTCAGCGTTGCGGCGGCAATTTGTGTG  
AATGTGTGTTTGTGTGTGTGTGGGGGGGGGAATGGGGGGTGGGGGTGTAATGGCGGCGCGGGAGATT  
GGGATCACGGGACTGACACTACCATCAGATGGCTTTGGGGGAGAGGATGGGATTTTCGGGTGAACTGG  
AACAAGGATGTGTGTGTGTGTGTATGTGTGTATGTGTGTTGTTTCATGCTGCTCTAGCAGCTGCGGAAA  
CAGCTCCTGGGTGATGGGTGGCTTCCTAGGCACTACAGCTACGGGCTATGGCGAGCCCGTCATAGCAG  
CCTGCTGGGAAGCCGATGTGGTGCGTAACGTTGGTTCGCTTAGGAGGGGTCGTGGAGGGGTCGTGGAGG  
GGTCGTGGAGGGGTCGTGGAAGTATCGATGTTGCGTTTTGCGGTGACCCAGCGTGAAGAATAACAAATG  
CCAACAGTGTGCGAGTGTTATCAGGTGCAAAGTCCCTCCGCAGTGCTGATGCCTCCTCTTCAGCAGCAG  
CCTGCCCTACGCGATTACACGGTGGTTGAAGTGGTTGCTGGTTGGCGCCGCCAGCATTATATTTTAAC  
CACGTCAGGGCCTGATGCGCCGTGGGTTTTAGGAAGCAGCTTCTCGCCTGAAGGGAGGGGGAGACGGGT  
TCTGGGTTGGTTTGGTTCTGGTGCCCGCTAGGGTGAGAATTGCTGAAGGGCTGACGTGTACCAGGTCA  
TATGTACCCTAGTGGCGCGAAGTAAACAGACGAGCTAGGGAACATAACAATAACAACAGCAAATACAA  
TAAGCTTTAAACGATCTATTGATATGCGCTGCATGTGCGTGCGTATGTATGTGTGTATACGGCGATG  
CGAGTACGGCATCTTTCCATACTCTGGTCTTTAATCTCACCCCTGAAACACACCACCTTCGTTTGCGC  
GTGCATCCATGCGTGTGTGGTGTGGGCTGGCGTGGCCTAGTAAGTGGAAATGATTTCAAAGCCAAAAC  
AAGCTACCGGGATAGCATCAGTCTCTTCAATCATTCACCCGGTCTCCGCGTGTGGCGCTTGGGGGTAT  
GTTCCCACTGCCGCCACTGTCACCTGCTGAGCTGTGCGCATGTCGTAATAACGCCTCTGCACGCCAGC

**NotI**  
previous  
sequence  
gap

**NotI**  
**SacI**

CCGTGGTATCGTTTTCCGGGATCCCGCTGTCGGGTCTAAGAATGGCTTCCGTTGCTGGCGCTGCTCGC **BamHI**  
TGAACGCGAGACCAAGTTAACTTTTACTCCTGGAGCAGAAGGTTTAGTAAAACAAGCTATTGCTGAA  
TATTTAGAAGAATTCAAATCAAGTGCTAAAGCTGCTTAATTAGTAATAATTTATATAATTTGGTGTCC **EcoRI**  
ACAACATACATAGCTGCCGGTTGCAACCACATCTACACCCACATATGTCTGTGCGCGTGCGTGTGCA  
CCTTGGGCTGCTTATGTGCTACCTACGAATGTATTAACCTAGAGCCCCATTACATGTGCTCAACCA  
TGCCTACCAACACAACACCAACACATTTCCCCTTCGCACCCGTTCTCTGTTCTGAACCCACAGACGGC  
AAGTGCAAGGGCTCCATTTTGCCGTTCACTCTGTCCAACACCGCGGAGATTAGGTCGTCAATTCTCCTG  
GGACTCCACTCGCCAGTCCCTCAAATTCACCCGCCTGGGCCTCACCTATGCTCAAGGTGTCGCCGCGC  
GCAGCCTCTGCTTCAACATCAAGGGTGCCGGCTGTACCAAGTTTGCAGATCTCTGTCTGGCCGCGGC **BglII**  
TGCACCGTCGCGGTATTCAACAACCCCGACAACACATGTTGCCGCGGGTCGGCACCATCGCGTAAAG **stop**  
CGTTTTCGCATGACGATGCAAAAAAAGGGTGGTGCAGCGCAACACCCCCCGTGGGTGTGTGGGTGTG  
TGTGCCCGCGCAAGAAGATTGTGCGTGAGTGGATGTGCGCGGATGTGGGGGGGAAAACCGCCAGTCCC  
TTTCTTATATGCTGCTACACATGACTGAGGTTGCTGCCGGGGAGGCGGAGGAGGCTTGTGGGTGTGGC  
GTCGGCGTCGATGCCAAGTCACCGCTGTGCCACTGCTGCGGCGGGCTTGGATAGCAGCAGCAGCGGCG  
CAGCAGCAGCAGCATCCGCAGCATCAGCAGCATAGGGACGCATGCATGCCTTTAGCCGGAATGGGAGG  
GCTGCGTGCTGCTTTTGCAACCGCAGGGGTGAAAGTAGGTAGTCCTGCATAAATGATTAAGCACTGGT  
CAAATGTCGCTGAGATGAACATAACACGATTATATATGATATGATGCGCGACATGATTGTTGGATGCG  
GCCAGTACTTTTTTCCGCTGCGCAGGTGTCAGTGTTCAGCTTGGGTTTGATCCAGTTACGGGCCTCTC  
GGCGTCTACCAAACGCAAATTGTCGTTAATTGATATTCTCTTGCTTTTTTGCGCATCTCGTCAAGTGAG  
GGCAGCGTCCCCCTCCTGTGCTGCTGCACTTGACGTGGCTGTTGGAATGTTCCGTGCATGGCCGCTGG  
CCCGAACCATTGTAGTTGAGTGACTACTGCGCTAACATTTCAGTTATTTTCGTAATAATCACCATCATA  
ATTATCATCATCGCTACCTGCCTATGGCCGGGAAGTTGAGCAGGTTTTAACGTTTTTACGTTCAATCCC  
GATGGCCACGTCACGTGTAGCAGGCCTTTGCGTTCCCGCTCTCTTGTAACCTATTTCTCATAGATAT **EcoRV**  
CAAATTTGGCTCATCTTTGCAGTGGAGTATTCCTACAAATAGAGGTGCATCTGCCAGATTTGGCAAAT  
AGAGGTGCATCTGCCAGATTTGGCCGGTGGGGGGACCTTATTAACCGTCGTTAACCAAGGATCC **BamHI**

The sequence depicted here corresponds to the 8.8-kb genomic fragment utilized in plasmid pSSG185-YFP. The *ssg185* gene is located on scaffold 2 (nucleotides 4191410 to 4198020) of the *V. carteri* genome version 2.1 (Prochnik et al., 2010) in Phytozome 12.1.6 (Goodstein et al., 2012) and has the gene ID Vocar.0002s0564. The start codon is at nucleotide position 4191698 to 4191700 on the forward strand. The gene structure is indicated as follows: Coding sequences are shown with blue background, UTRs with green background and the promoter region with grey background. Start and stop codons are highlighted (violet font). A previous sequence gap, which we closed, is also indicated (blue font). The 5' UTR is 153 bp in length, while there is a quite long 3' UTR of 891 bp. The restriction sites that are shown in Supplemental Figure S5A and B are marked (bold, underlined).

## References

Goodstein, D. M., Shu, S., Howson, R., Neupane, R., Hayes, R. D., Fazo, J., Mitros, T., Dirks, W., Hellsten, U., Putnam, N. et al. (2012) Phytozome: a comparative platform for green plant genomics. *Nucleic Acids Res.* **40**, D1178-1186.  
Prochnik, S. E., Umen, J., Nedelcu, A. M., Hallmann, A., Miller, S. M., Nishii, I., Ferris, P., Kuo, A., Mitros, T., Fritz-Laylin, L. K. et al. (2010) Genomic analysis of organismal complexity in the multicellular green alga *Volvox carteri*. *Science* **329**, 223-226.
