# Supplementary material for: Cell Type-Specific Pherophorins of Volvox carteri Reveal Interplay of Both Cell Types in ECM Biosynthesis
Source: MDPI journal article supplement (doi:10.3390/cells12010134), 2022-12-29
Supplement: s1 [file s1]

## Supplemental Figure S6

### Genomic sequence of the *V. carteri* *phG* gene

TTGCCCTTCCGAAGCGGCAGGAAGCTACCGACCTGAACATGCTTTTAGGACTTTCAATCTGTGCACCC  
GAACACACAAGTTACAATCAACGCTGTAATGCGGGTAAGTTAATAATTAATGCATTTGTCAAGCAATC  
GGTGTTTGACATCCGTGATAAAGTCTCTTCAGAATCTGCAGCCCGAGTGTTCAATTTGTTTCAATAAAA  
CTTGTGAAAAGTGTATGAATGTGTCTATTTGGCATGTACTTCTGTGTTAATGATACAGCCGGTGATAC  
GCGTTTGATAACCACTCGTTATCCGGAACAATCGACCCGTATCGACATGATGTAGATGTCTGGGATCG  
CTGATGGATTCCCCAAAATTCTTCTGTTGCTTATCTTCAGAACAAAGTACTTCAATCTTCTATGCTAG  
AAATACCAGTGCTCAACGAATGCTCCTGCCTGCCGCCACCACATCTCGCTGTATGTGTGCGCAAAGGCG  
GGATCCGCATATTGAACAACACCTTTCTCAATTGACTCCAAGCACCATGTTGCCAATATATTTATTC  
AGACATTGCGATATATACTCCAAGGCAAGGAAACGAACGGCATCAATGTCAAGTGCGCTAATGCACGC  
ACGGGTCGCGAGCGCTACAATGCTGACGAGCCCATACTTCAATCAGGAGTAAGCGACGAAAGTGAGGA  
ATATCGACTAAGCGATGACAGTGAGAAATCGTTAATTGTGCATAACAAGCGTGATTCCCGCTTGAAGG  
GTTGTAGCTGCATCTAGCTTTTTGCCCCTGGCAGCAGATGGCAAATATCTACCATCGGCTGTCAAGTA  
AATACGGTTTTTGTGCGGGGATTTAAAGTAACGAAAGGTTCAAAGGAACGGAAGGAGCTACACATTGGGC  
TGCACGCGACTGATTTCAACCAGCTCCATTGTGCTACTGTACGTTCAAAGTAGTCTGAAGTAAAGCTG  
ACTATAAATACGCGGTTGCCAATTATAC**GTTCGAC**ATACTAATTGGGCA**CATAGAGGGCCTAC****ATGCGA**  
**ACACCAATGAGGAATATACTGCTGGCTGCTCTTTGCGTAGTCGCCGTATTCTC**GTAAGTGTCGTTGCT  
TACCTTGCTAGGGCCAGCTGCAGGCTTCGATGTACAAGCATGTAGGGTTCGCAGGCTTATTCTTAAAC  
GTTTACCTACCTTCTGAGCCATGAGGAGTCGTAGCTTTAATAGCCATGCTGCAATCCGTTTGGCTTAC  
GTCGCTTTGGCGGGCAGGGCGCCAGTATCACCCCGTGTGCTTGATCGCTGCGGCTCCCCCATTCTTG  
CGAAATTCACCATCATATTTGTAAATGATTGATGACTTGCTGAATCTCTTGCCACCTTGCGCTTATTT  
TCCAATCTGCAG**GGCGTCGCACGCGCTGAGTAGTCCGCTGTCGCCCCCGCCGACAAGATACCAGGCAT**  
**TTCTTACTGCGCAAAATGCGTCGCTTTGGAGCCTATATACCGTCTAAAGCCTGATTTTGCCGGATTT**  
**GGAAATCGCACCTTCTGCTTCACGCTGGAAGTGAATCCTCTCAATGCCGACTTCATGTGCAAGAATGC**  
**ATTAATCTACAAGATGGAT**GTGAGTATATATCAATTGAACATGTGTTGATGTAGCGCAACTAGCACTT  
CGGGCGGTTCTCGAAATCTAGCAGCCTTTTCGCGTTACGGTTGTGCAACGTTAAAGCTTTAGTCAGTCA  
CGAGGGCGCGCAACTGTGTGTCACTCCATTTCGAGCAGATTTACCTTGCTGCTTTCATGACATA  
GAACATAAGAAGGGTTATCTACTTCCATTTTTTATTATCGTTAACAGCGTTCCCCGGCGAACCCGCAGA  
TGCTTCTCAACAAAGGGTGCGGAAGGGATGTTAACGTCAAGGCTTTTCGTAAATGGCGTCTTCACAAGG  
AGCTTCACAGAATCTCCACGTTCTGCCGCAAATGGGACTGTGATATTGAACTGAACGATCTGACCGC  
GCGACACCTGGGTATCAACAGCAATGGCGCCAGGATTTGCCTTACTATATTGAATGGGGGCAAGGGCA  
ACTGCACCACTTTGAGGTCGCTCTGTGCAGACCCTAAGACCACCAACTTCAGAAAGGATAACAACGGC  
ACTTACAGAAATACAAATTCCCCAAGAGTGCATGGTTGCGCTATTTCGCCGGGATCGACAGTGGCTCCGA  
CCGTACCTGCTGCGACCCCGGTTCTCCCCCATCTCCAACGCCGCCCGCCCTCCTCCAGGGAATTGCA  
CGGAGGAGAAGGTCTGTGTCTATCTGACCTTTGGGTTCCGCGAACCG**GACGTC**GCCTTCCCCAACGGC  
ACCTGCAATAATTTGGCCAGCCAGATACAGTTTCGACCTCCTCAACTCAAGCGCATCCTACATCTTGCA  
GCCCCCGGTAGTTCCACAGATCACTTGCACAGCAGACTTTATCAAAGTTTGCTTAAATTTGGACTTGC  
ACGCTAACGCTACAGAGCTGCATTCCGTGGTTGGTGAAGTGGCGGTCCCTGGCTGAATTACGCTCAC  
AACTCCACGTGTGCGGCAAGTCGCTCCAACCTACAGCCTACAATTACGGTCGGAGGGGATGGCGACTG  
**GTCGAC**TGGCAACGTCTCGTTCCGTTGTTTCAATGCGTCAACTGAAACCAAGTGCCAAGGGCCCTCGA  
AGAAATCATGCAAGTGAGTCGAGCAAACCTGGAGGAGGGGGACAAGTATTGCGTGGCGGTGGGGAGTA  
AACATGTCTGGCGTTGATCTAATGTGGGATTGCATGCTCGACGCGGATGCATGCACGCATCCACGTAC  
GTGTCAGCAGCTACATCTTCTGAGCTACTGGTTTGAATTGGATTTTAGCAGCTTTGTGCCCTCACAT  
GATTATCCTTCCAGCTGTATCCCTCTGCTCTCGCCACCTATCCCTTTCCCTCCTTCTCCTTCTCCT  
CCGCAG**CTGCAATATGGCGAGGAACATCACCCCTTCGCCGCCTTGCCGACTATGAGCGGTCCCTTCA**  
**CGGGCCGCAAGAACACGAAGCTGTACTGCTTCAACATCACCGTCGTGAAGCCCATCGAGCCAAAT**GTG  
GGTCGACGCTCGCTGGCGCCCGGTACACCGCATGATAGCATGTGCATGTCCTGGTTGATGTATGT  
ATGTATGTATGTGGCCATCTACTGGCTGCGACACGAGCACAGTAGTAGTGCCACATTGACGGCTACAT  
CGATTACGCTGTACAGATGTCTAAATGGTGCATGCGGCCACATCTTCTCCAGTAGCACTCCATTAC  
GGTTCCCTTGCTATCCAATCCTATCCCTCGCATATCCCCCTTTACAG**AGCACCTGCGGTAAAAGCAA**

**SaII, start**

**AatII**

**SaII**

TGTGCTCGATAAGGTCATCATCTGGGCCAACGACACCAGTTTTTACCGCAGCAGCATCAAGTCCATCG  
 CTCTCTACGCTGCGGGCGACACCACCGGAAGTATGTCCCGCCGAGCTGGAACTCGGATAGACAGGAG  
 GTGAAGGCAACCAAGATTGGCTGGACTAAGGATAAGGCGAACGGCGGCCCATCTGCCTGGAGCTGGA  
 CCAAACGTC AACCTGGCTGACTTTTGCATATGGCGGGGTCCCAAGCAGAAGA ACTCTTGCATGTAAG  
 GGCTGGGGATTTATTTGGGGGTTGCCTGCATGCTTGTGCATGCAGTGTGCATGCATGGCGGGATGTGA  
 GTGTGCGCGAACTAGGCGGCACTCGGTCGCCATCCCGGCTGCAGAAATGCAGGCATGCACCTAGCTAG  
 ACTATTTACGCGTGCTTCCTTGCACATGGTTGAAGAGCTCTCCAATGGCACCCCTAGCCTTGCCTAGC  
 TTAGCTTTTCTACTGCTTAGAGGCGCCTCTGGGCCGAGCGTCCTGTCTACCTACCTTATTGTGCGTCC  
 CCCATGCCCATGCCCATCTTGCTGAATGCAGGGTTTTACTTTTCGATACATCCTATAGATGCTGCCCC  
 ATGTACCGGCCGATGGCGCTTACTACGTAGATGCGTGCCGTACAGCTGGCTAGTCTTGTGCAGAGCA  
 TGCACGTTGGATCAGCTGACCTGGTGAGGCGAGGAAGCCCCATCTAAGGTTGTGCGATTGGGCGATTTG  
 TGTGTTGCGTGGTAGGATGTAGAATATTTGGTTTGCGAATGTGCTTTGGATAAAATCCATGTTGGTAG  
 TTCTTAACTTGTGCACGATGCTGCCCGTGAACAGGGCAGGTAAGGTTGTGTGTTTGAAGTGTTTGG  
 AATTACATGGAGGTTATCTCTAAGTTTCAGTGATTAACAGTGCTTAAACAGTCATGTCTGGTTTGC GG  
 CTGTTTGCCTGTTCTTACCGGCCGTGTTGCCTGCTGGACCTGCCGCTGCTGCGCAGCC  
 TACCCGTGCGATTTTCGCTAGGAAGAATTTCAATTCGTTGTGCAGGTGCGCTTTCTTACTTTTTCAATT  
 CTGTCTGTCAGAGGTGCTTGCTTCCTTGCAGCAGGTGGAACCTGATCACCTCGCCGCCGTTTCGATCAT  
 TTAAATACCCCTACGTCGCGCAATGATGTGGGGTATCGTAGGCTGCTTTATGCAGCCTCGTTCGCTT  
 ATTTGATCGCACCTGCGATTGTAGCAGCTTCATTCATTAGCTGAATCAAGTGAGCGAGCACGCTCGGT  
 CGGTCAGGTTTTATAACATGCTGCTTGCTGCTCAAGCTTTTGCTAATATTGTATAGCGCAGGTACGCT  
 TTGCTGATTGCTTCTGGGGTCGCCCTAGTTCGGGGCTACTGCTTGCATGCTGTGTGTGGTGAGATAGCA  
 GGCTGGCTGCCATTACTGCGGAGTACGCAGCTCTTCAGCCATATATTCATAGTTAGGACGAATTGATT  
 AGCCAGCCATGGCGATGTCAGTTCAGTTC AATGTCCATTTTCATACGCGCCTTGCGTTTTGTTTTATG  
 GCTGTGAGTCTGCGTGATCACCTTATGTTAGATCGATGCATCCTGCAATCGTTTTGTGCGTTGTAACA  
 CTGCGAGCGCGACAGGCAGAGTGTTAGGCGTATTGGCGAGAAATGTCCTGTTTCGGTTAGGGCGGTTTG  
 GTTAGGGCAGTTTCTAAAGATCCTCTGCCGGCTGATGGAATATCGGTGTTTATGTGTAGGAAATTTTC  
 TCCCGCCCGCCATCCATCCCCAACATTACCGTGTAACATAATCCAACAATCCTTGGCCCATCCTATCC  
 TATCCAAGCAGGTCTTCAAGCATACTTTTTTCATCTCCTTCACACTGCAGCCGGCAGCAGGCATGATTC  
 CTGCGAAC

stop

NcoI

The sequence depicted here corresponds to the 5244-bp genomic fragment utilized in plasmid pPhG-YFP. The *phG* gene (former common name *phV47*) (von der Heyde and Hallmann, 2020) is located on scaffold 1 (nucleotides 2224937 to 2230180) of the *V. carteri* genome version 2.1 (Prochnik et al., 2010) in Phytozome 12.1.6 (Goodstein et al., 2012) and has the gene ID Vocar.0001s0298. The start codon is at nucleotide position 2225951-2225953 on the forward strand. The gene structure is indicated as follows: Coding sequences are shown with blue background, UTRs with green background and the promoter region with grey background. Start and stop codons are highlighted (violet font). The 5' UTR is just 14 bp in length, while there is a quite long 3' UTR of 1,168 bp. The restriction sites that are shown in Supplemental Figure S4A and B are marked (bold, underlined).

## References

- Goodstein, D. M., Shu, S., Howson, R., Neupane, R., Hayes, R. D., Fazo, J., Mitros, T., Dirks, W., Hellsten, U., Putnam, N. et al. (2012) Phytozome: a comparative platform for green plant genomics. *Nucleic Acids Res.* **40**, D1178-1186.
- Prochnik, S. E., Umen, J., Nedelcu, A. M., Hallmann, A., Miller, S. M., Nishii, I., Ferris, P., Kuo, A., Mitros, T., Fritz-Laylin, L. K. et al. (2010) Genomic analysis of organismal complexity in the multicellular green alga *Volvox carteri*. *Science* **329**, 223-226.
- von der Heyde, B. and Hallmann, A. (2020) Targeted migration of pherophorin-S indicates extensive extracellular matrix dynamics in *Volvox carteri*. *Plant J.* **6**, 2301-2317.
