# Supplementary material for: Cell Type-Specific Pherophorins of Volvox carteri Reveal Interplay of Both Cell Types in ECM Biosynthesis
Source: MDPI journal article supplement (doi:10.3390/cells12010134), 2022-12-29
Supplement: s1 [file s1]

## Supplemental Figure S1

### Sequence of the chimeric gene *phG:yfp* as it is present in the vector pPhG-YFP

**GGTACC**TGAACATGCTTTTAGGACTTTCAATCTGTGCACCCGAACACACAAGTTACAATCAACGCTGT  
AATGCGGGTAAGTTAATAATTAATGCATTTGTCAAGCAATCGGTGTTTGACATCCGTGATAAAGTCTC  
TTCAGAATCTGCAGCCCGAGTGTTCAATTTGTTTCATTAACCTTGTGAAAAGTGTATGAATGTGTCTA  
TTTGGCATGTACTTCTGTGTTAATGATACAGCCGGTGATACGCGTTTGATACCACTCGTTATCCGGAA  
CAATCGACCCGTATCGACATGATGTAGATGTCTGGGATCGCTGATGGATTCCCAAAAATTCTTCTGT  
TGCTTATCTTCAGAACAAAGTACTTCAATCTTCTATGCTAGAAATACCAGTGCTCAACGAATGCTCCT  
GCCTGCCGCCACCACATCTCGCTGTATGTGTGCGCAAAGGCGGGATCCGCATATTGAACAACACCTTTC  
TCAATTGACTCCAAGCACC AATGTTGCCAATATATTTATTTCAGACATTGCGATATATACTCCAAGGCA  
AGGAAACGAACGGCATCAATGTCAAGTGCGCTAATGCACGCACGGGTCGCGAGCGCTACAATGCTGAC  
GAGCCCATACTTCAATCAGGAGTAAGCGACGAAAGTGAGGAATATCGACTAAGCGATGACAGTGAGAA  
ATCGTTAATTGTGCATAACAAGCGTGATTCCCGCTTGAAGGGTGTAGCTGCATCTAGCTTTTTTGCCC  
GTGGCAGCAGATGGCAAATATCTACCATCGGCTGTCAAGTAAATACGGTTTTGTGCGGGGATTTAAAGT  
AACGAAAGGTTCAAAGGAACGGAAGGAGCTACACATTGGGCTGCACGCGACTGATTTCAACCAGCTCC  
ATTGTGCTACTGTACGTTCAAAGTAGTCTGAAGTAAAGCTGACTATAAATACGCGGTTGCCAATTATA  
**CGTCGAC**ATACTAATTGGGC**CATAGATCTCCTAC****ATG**CGAACACCAATGAGGAATATACTGCTGGCT  
GCTCTTTGCGTAGTCGCCGTATTCTCGTAAGTGTGCTTGCTTACCTTGCTAGGGCCAGCTGCAGGCTT  
CGATGTACAAGCATGTAGGGTTCGCAGGCTTATTCTTAAACGTTTACCTACCTTCTGAGCCATGAGGA  
GTCGTAGCTTTAATAGCCATGCTGCAATCCGTTTGGCTTACGTCGCTTTGGCGGGCACGGGCGCCAGT  
ATCACCCCGTGTGCTTGATCGCTGCGGCTCCCCCTCATTTTGCGAAATTCACCATCATATTTGTAAATG  
ATTGATGACTTGCTGAATCTCTTGCCACCTTGCGCTTATTTTCCAATCTGCAGGGCGTCGCACGCGCT  
GAGTAGTCCGCTGTGCCCCCGCCGACAAGATAACCAGGCATTTCCCTTACTGCGCAAATGCGTCGCTT  
TGGAGCCTATATACCGTCTAAAGCCTGATTTTGCCGGATTTGGAATCGCACCTTCTGCTTCACGCTG  
GAAGTGAATCCTCTCAATGCCGACTTCATGTGCAAGAATGCATTAATCTACAAGATGGATGTGAGTAT  
ATATCAATTGAACATGTGTTGATGTAGCGCAACTAGCACTTCGGGCGGTTCTCGAAATCTAGCAGCCT  
TTCGCGTTACGGTTGTGCAACGTTAAAGCTTTAGTCAGTCACGAGGGCGCGCAACTGTGTGTCACTCC  
ATTTCGAGCAGATTTACCTTGCTTGTCTTCATGACATAGAACATAAGAAGGGTTATCTACTTCCA  
TTTTTATTATCGTTAACAGCGTTCCCCGGCGAACC CGCAGATGCTTCTCAACAAAGGGTGCGGAAGGG  
ATGTTAACGTCAAGGCTTTCGTAAATGGCGTCTTCACAAGGAGCTTCACAGAATCTCCACGTTCTGCC  
GCAAATGGGACTGTGATATTGAACTGAACGATCTGACCGCGCGACACCTGGGTATCAACAGCAATGG  
CGCCAGGATTTGCCTTACTATATTGAATGGGGGCAAGGGCAACTGCACCACTTTGAGGTGCTCTGTG  
CAGACCCTAAGACCACCAACTTCAGAAAGGATAACAACGGCACTTACAGAAATACAAATTCCCAAGAG  
TGCATGGTTGCGCTATTGCGCGGGATCGACAGTGGCTCCGACCGTACCTGCTGCGACCCCGGTTCTCC  
CCCATCTCCAACGCCGCCCGCCCTCCTCCAGGGAATTGCACGAGGAGAAGGTCTGTGTCTATCTGA  
CCTTTGGGTTCCGCGAACC**GACGTC**GCCTTCCCCAACGGCACCTGCAATAATTTGGCCAGCCAGATA  
CAGTTCGACCTCCTCAACTCAAGCGCATCCTACATCTTGACGCCCCGGTAGTTCCACAGATCACTTG  
CACAGCAGACTTTATCAAAGTTTGCTTAAATTTGGACTTGACGCTAACGCTACAGAGCTGCATTCCG  
TGTTTGGTGAAGATGCCGGTCCCTGGCTGAATTACGCTCACAACCTCCACGTGTGCGGCAAGTCGCTCC  
AACTACAGCCTCACAATTACGGTCGAGGGGATGGCGACT**GTCGAC**TGGCAACGTCTCGTTCCGTTG  
TTTCAATGCGTCAACTGAAACCAAGTGCCAAGGGCCCTCGAAGAAATCATGCAAGTGAGTCGAGCAAA  
CCTGGAGGAGGGGGACAAGTATTGCGTGGCGGTGGGGAGTAAACATGTCTGGCGTTGATCTAATGTGG  
GATTGCATGCTCGACGCGGATGCATGCACGCATCCACGTACGTGTCAGCAGCTACATCTTCCTGAGCT  
ACTGGTTTGAATTGGATTTTAGCAGCTTTGTGCCCTCACATGATTATCCTTCCAGCTGTATCCCTCTG  
CTCTCGCCACCTATCCCTTTCCCTCCTTCTCCTCCTCCGAGCTGCAATATGGCGAGGAACAT  
CACCCCTTCGCCGCCTTGCCGACTATGAGCGGTCCTTTCACGGGCCGCAAGAACACGAAGCTGTACT  
GCTTCAACATCACCGTCGTGAAGCCCATCGAGCCAAATGTGGGTGCGAGCGCTCGCTGGCGCCGCCGT  
ACACCGCATGATAGCATGTGCATGTCCTGGTTGATGTATGTATGTATGTATGTGGCCATCTACTGGCT  
GCGACACGAGCACAGTAGTAGTGCCACATTGACGGCTACATCGATTACGCCTGTACAGATGTCTAAAT  
GGTGCATGCGGCCACATCTTCTCCAGTAGCACTCCATTACGGTTCCCTTGCTATCCAATCCTATCCC  
TCGCATATCCCCCTTTACAGAGCACCTGCGGTAAAAGCAATGTGCTCGATAAGGTCATCATCTGGGC  
CAACGACACCAGTTTTTACC GCAGCAGCATCAAGTCCATCGCTCTCTACGCTGCGGGCGACACCACCG  
CGAAGTATGTCCCGCGAGCTGGAACTCGGATAGACAGGAGGTGAAGGCAACCAAGATTGGCTGGACT

**KpnI**

**SalI, BglII, start**

**AatII**

**SalI**

AAGGATAAGGCGAACGGCGGCCCATCTGCCTGGAGCTGGACCAAACGTCAACCTGGCTGACTTTTG  
 CATATGGCGGGGTCCCAAGCAGAAGAACTCTTGCAATGTAAGGGCCTGGGGATTTATTTGGGGTTGCC  
 TGCATGCTTGTGCATGCAGTGTGCATGCATGGCGGGATGTGAGTGTGCGCGAACTAGGCGGCACTCGGT  
 CGCCATCCCGGCTGCAGAAATGCAGGCATGCACCTAGCTAGACTATTTACGCGTGCTTCCCTGCACAT  
 GGTGGAAGAGCTCTCCAATGGCACCCCTAGCCTTGCACTAGCTTAGCTTTTCTACTGCTTAGAGGCGCC  
 TCTGGGCCGAGCGTCCTGTCTACCTACCTTATTGTGCGTCCCCCATGCCCATGCCCATCTTGCTGAAT  
 GCAGGGTTTTACTTTTCGATACATCCTATAGATGCTGCCCGATGTACCGGCCGATGGCGCTTACTACG  
**ACTAGTTCTAGA****GGCGGAGGCGGTGGC**ATGAGCAAGGGCGAGGAGCTGTTTACC GGCGTGGTGCCCAT  
 CCTGGTGGAGCTGGACGGCGACGTGAACGGCCACAAGTTTACGCGTGAGCGGCGAGGGCGAGGGCGACG  
 CCACCTACGGCAAGCTGACCCTGAAGCTGATCTGCACCACCGGCAAGCTGCCCGTGCCCTGGCCACCC  
 CTGGTGACCACCCCTGGGCTACGGCCTGCAGTGCTTCGCCCCGTACCCCGACCACATGAAGCAGCACGA  
 CTTCTTCAAGAGCGCCATGCCCGAGGGCTACGTGCAGGAGCGCACCATCTTCTTCAAGGACGACGGTA  
 ACTACAAGACCCGCGCCGAGGTGAAGTTTCGAGGGCGACACCCTGGTGAACCGCATCGAGCTGAAGGGC  
 ATCGACTTCAAGGAGGACGGCAACATCCTGGGCCACAAGCTGGAGTACAACACAACAGCCACAACGT  
 GTACATCACCGCCGACAAGCAGAAGAACGGCATCAAGGCCAACTTCAAGATCCGCCACAACATCGAGG  
 ACGGCGGCGTGAGCTGGCCGACCACTACCAGCAGAACACCCCCATCGGCGACGGCCCCGTGCTGCTG  
 CCGGACAACCACTACCTGAGCTACCAGAGCAAGCTGAGCAAGGACCCCAACGAGAAGCGCGACCACAT  
 GGTGCTGCTGGAGTTCGTGACCGCCGCCGGCATCACCTGGGCATGGACGAGCTGTACAAG**GATATCG**  
**AATTC**TGGAGCCACCCGCGAGTTCGAGAAG**TAATCTAGAT**AGATGCGTGCCGTCACAGCTGGCTAGTCT  
 TGTGCAGAGCATGCACGTTGGATCACTGACCTGGTGAGGCGAGGAAGCCCCATCTAAGGTTGTGCGAT  
 TGGGCGATTTGTGTGTTGCGTGGTAGGATGTAGAATATTTGGTTTGCGAATGTGCTTTGGATAAAATC  
 CATGTTGGTAGTTCTTAACTTGTGCACGATGCTGCCCGTGAACAGGGCAGGTAAGGTTGTGTGTTTG  
 GAAGTGTTTGAATTACATGGAGGTTATCTCTAAGTTTCAGTGATTAACAGTGCTTAAACAGTCATGT  
 CTGGTTTGGCGCTGTTTGCCTGTTCTTACCGGCCGTGTTGCCTGCTGGACCTGCCGCT  
 GCTGCGCAGCCTACCGGTGCGATTTGCTAGGAAGAATTTCAATTCGTTGTGAGGTGCGCTTTCTTA  
 CTTTTTCAATTCTGTCTGTGAGAGGTGCTTGCTTCCCTGCGAGGTTGGAAGTATCACCTCGCCGCC  
 GTTTTCGATCATTTAAATACCCCTACGTGCGCAATGATGTGGGGTATCGTAGGCTGCTTTATGCAGC  
 CTCGTTGCTTATTTGATCGCACCTGCGATTGTAGCAGCTTCATTCATTAGCTGAATCAAGTGAGCGA  
 GCACGCTCGGTGCGTCAGGTTTTATAACATGCTGCTTGCTGCTCAAGCTTTTGCTAATATTGTATAGC  
 GCAGGTACGCTTTGCTGATTGCTTCTGGGGTCGCCTAGTTTCGGGGCTACTGCTTGCATGCTGTGTGTG  
 GTGAGATAGCAGGCTGGCTGCCATTACTGCGGAGTACGCAGCTCTTCAGCCATATATTCATAGTTAGG  
 ACGAATTGATTAGCCAGC**CCATGG**CGATGTGAGTTCAGTTCAATGTCCATTTTCATACGCGCCTTGCG  
 TTTTGTTTATGGCTGTGAGTCTGCGTGATCACCTTATGTTAGATCGATGCATCCTGCAATCGTTTTGT  
 GCGTTGTAACACTGCGAGCGCGACAGGCAGAGTGTTAGGCGTATTGGCGAGAAATGTCCTGTTGCGTT  
 AGGGCGGTTTGGTTAGGGCAGTTTCTAAAGATCCTCTGCCGGCTGATGGAAATATCGGTGTTTATGTG  
 TAGGAAATTTCTCCCGCCCGCCATCCATCCCCAACATTACCGTGTAACATAATCCAACAATCCTTGCC  
 CCATCCTATCCTATCCAAGCAGGTCTTCAAGCATACTTTTTTCATCTCCTTCACACTGCAGCCGGCAGC  
 AGGCATGATTCTGCGAAC**GCGGCCGC**

**SpeI, XbaI,**  
**gly5**

**yfp**

**EcoRV, EcoRI,**  
**strep tag, stop,**  
**XbaI**

**NcoI**

**NotI**

The vector pPhG-YFP carries a 5.3-kb fragment of *V. carteri* genomic DNA containing the *phG* gene (*phG*) including its 5 introns, a short linker sequence, which codes for 5 glycines (Gly5), a strep tag and the coding sequence of *yfp* (mVenus). The chimeric gene is controlled by the original *phG* 5' and 3' flanking sequences, including the promoter region. The corresponding gene entry in the current *Volvox carteri* genome version 2.1 (Prochnik et al., 2010) in Phytozome 12.1.6 (Goodstein et al., 2012) is Vocar.0001s0298, the former common name is *phV47* (von der Heyde and Hallmann, 2020). The *yfp* (mVenus) gene has been codon-adapted for *C. reinhardtii* (Lauersen et al., 2015) but also works well in *V. carteri* (Tian et al., 2018; von der Heyde and Hallmann, 2020). Artificial *XbaI*, *NotI*, *BglII* and *SpeI* sites have been introduced to facilitate cloning. The background colors indicate the following sequence features: grey, *phG* promoter region, green, 5' and 3' UTRs of *phG*; blue, coding sequences of *phG*; turquoise, sequence coding for 5 glycines (Gly5); orange, sequence coding for strep tag; yellow, coding sequence of *yfp* (mVenus). Start and stop codons are highlighted (violet font). Relevant restriction sites are marked (bold, underlined).

## References

- Goodstein, D. M., Shu, S., Howson, R., Neupane, R., Hayes, R. D., Fazo, J., Mitros, T., Dirks, W., Hellsten, U., Putnam, N. et al.** (2012) Phytozome: a comparative platform for green plant genomics. *Nucleic Acids Res.* **40**, D1178-1186.
- Lauersen, K. J., Kruse, O. and Mussgnug, J. H.** (2015) Targeted expression of nuclear transgenes in *Chlamydomonas reinhardtii* with a versatile, modular vector toolkit. *Appl. Microbiol. Biotechnol.* **99**, 3491-3503.
- Prochnik, S. E., Umen, J., Nedelcu, A. M., Hallmann, A., Miller, S. M., Nishii, I., Ferris, P., Kuo, A., Mitros, T., Fritz-Laylin, L. K. et al.** (2010) Genomic analysis of organismal complexity in the multicellular green alga *Volvox carteri*. *Science* **329**, 223-226.
- Tian, Y., Gao, S., von der Heyde, E. L., Hallmann, A. and Nagel, G.** (2018) Two-component cyclase opsins of green algae are ATP-dependent and light-inhibited guanylyl cyclases. *BMC Biol* **16**, 144.
- von der Heyde, B. and Hallmann, A.** (2020) Targeted migration of pterophorin-S indicates extensive extracellular matrix dynamics in *Volvox carteri*. *Plant J.* **6**, 2301–2317.
