# Supplementary material for: Cell Type-Specific Pherophorins of Volvox carteri Reveal Interplay of Both Cell Types in ECM Biosynthesis
Source: Cells. 2022 Dec 29;12(1):134. doi: 10.3390/cells12010134 (PMC9818292; doi:10.3390/cells12010134)
Supplement: Supplementary file 1 [file cells-12-00134-s001.zip]

Archive with 9 entries (9 files):
- Supplemental Figure S5.pdf
- Supplemental Figure S6.pdf
- Supplemental Figure S7.pdf
- Supplemental Figure S8.pdf
- Supplemental Table S1.xlsx
- Supplemental Figure S1.pdf
- Supplemental Figure S2.pdf
- Supplemental Figure S3.pdf
- Supplemental Figure S4.pdf
