# Supplementary material for: Cell Type-Specific Pherophorins of Volvox carteri Reveal Interplay of Both Cell Types in ECM Biosynthesis
Source: Cells. 2022 Dec 29;12(1):134. doi: 10.3390/cells12010134 (PMC9818292; doi:10.3390/cells12010134)
Supplement: Supplementary file 1 [file cells-12-00134-s001.zip › Supplemental Table S1.xlsx]

## Sheet: V. carteri
Common name	Volvox v2.1 ID	Volvox v2.0 ID / Volvox v1.0 ID (indicated)	References	Scaffold	from nucleotide	to nucleotide	Evaluation of gene model in v2.1	Missing nucleotides in v2.1	Deduced amino acid sequence	Sequence length [aa] (best gene model)	Length of individual proline- rich stretches [aa]	Cumulative length of proline-rich stretches [aa]	Expression gonidia (baseMean)	Expression somatic cells (baseMean)	Expression average (baseMean)	Fold difference in expression (soma/gonidia)	Classification: overexpression in
phI	Vocar.0004s0255	Vocar20010784m.g	Sumper et al. 1993, Godl et al. 1995, Sumper and Hallmann 1998, Hallmann 2003, Hallmann 2006, Prochnik et al. 2010	4	2026835	2031990	+++	-	MMRKALLALCVATAFAVAQAQNVAYPNFPYCQCIKSPSPYSLEPVVKSNRTGQYCFTLRVTKPSPSATGYCATKADIKKIEINVNQVCDVFGNVVNATLNGVPTKVGPAFDTPPDGPNTSRILRFTQLNLGLDSDGAMLCITLGQNDKGKGCTTLEDLCAPPAGAPKGTCSLALFDSKPDCCPISRVSPPAPPPPPPPPPPEPVAVPITPPCKTCVYATITALPPLLFPFQLTPSICQSVADKIAGDLEMIVTSYSIGYSGATITCSGNVIKVCASFSLPPGAPYTGLQADISNALTFWLSLLAPSTGCPAYFANHQVTVTVGGDGDPNSVTCLEGTATTTCKPGNPDFPKCECETKPAATRFAALPTLTQEPGRPSNRTNSTLYCFTLQVVAPLNPNG…	512	15	15	7038.38	158963	83000.8	22.5852	somatic cells
phII	-	85077 (Volvox v1.0)	Sumper et al. 1993, Godl et al. 1995, Sumper and Hallmann 1998, Hallmann 2003, Hallmann 2006, Prochnik et al. 2010	34	1008327	1012974	-	-	MAYFAKVAFILATALAVGWALSAHAQEYNEYDPSAVTPGSIPNFPFRDCNTTNGAYRLAPVWRPSGSNTYCFKIQVSQDALSCTGACCSADLHKIEFNVSSSCLVAGASVVATVNGVRTRVGATLDKAPAGPVGSAVLRLTQLGLDTTTAQDAEVCLTLKTNRGGQGCTTLEQLCSSPGFPAGTCTAAMFDVACDCCPVSQAGQALPPPPPVIPPVFRPCDVCIAATIVPPANDVRPYRYDSATCAAIQQNIADAMNSLLGGANIGAFSPFAPNASQCFDTQIITCGRFNGSDSDALANLTEAVQQQLSAFIGVASGGNVCNPKLEKYTVTVSTINNVADQCLDLSQSASCFLPGVPFPNCTCNTTQGVMPFTVSPTWYAQPANVRWGRNVTEYCFTVN…	524	10	10	6000	90000	48000	15	somatic cells
phIII	-	83859 (Volvox v1.0)	Hallmann 2003, Godl et al. 1995	34	961760	968584	-	-	MAKTLLFLATVVLAVGWVVKAQEYNEYDPSAVTPGSIPNFPFRNCNTTNGAYRLAPVWRPSGSNTYCFKIQVSQDALSCTGACCSADLHKIEFNVSSSCLVAGASVVATVNGVRTRVGAALDKAPAGPVGSAVLRLTQLGLDTTTAQDAEVCLTLKTNRGGQGCTTLEQLCSSPGFPAGTCTAAMFDVACDCCPVSQAGQALPPPPPVIPPVFRPCDVCIAATIVPPAIDVRPYRYDSATCAAIQQNIANIMNSLLGAANVGAFSPFAPNASQCFDTQIITCGRFNGSDSDALALLTEAVQQQLSNFIEIASGGNVCNPKLEKYTVTVSTINNVADQCLSLSQSTSCFLPGVPFPNCTCNTTQGVMPFVVSPTWYAQPANAHWGRNVTEYCFTVNTLPP…	518	9	9	600	9000	4800	15	somatic cells
phS	-	104453 (Volvox v1.0)	Godl et al. 1997, Sumper and Hallmann 1998, Hallmann 2003, Hallmann 2006, Prochnik et al. 2010	4	943314	949914	-	99	MMRNTLLAIAVLAVAWAAIADAYGEDPFYSFGEYNDYDAPAGEQTGLIPAFPFRNCASKIGAYRFLPNVTQRAPGHFCFTLKVQSCTNQCCGVDLHKIEFNVSDSCIVQPAAEAKATINGVYTRIGAAFGRPVNGRNGTAVLRLTQLGLDTTSAQNAEVCIILKNNRLGKGCTTLEQLCTPPPGYPSGFCAAAIFDTTCECCPISQASTLPLPLPNAPPSPLPPSPPPPPPPSPPPSPPPPPPPPPPSPPPSPPPPPPPPPPPPPPPPPPPPPPPSPPPPPPPPPPPPPPPPPPPPPPPPPPVYPDQCSVCIVAKLQPPAIDVRPYRYDPYACFQIQDAISTQINVALIDNNIHMLSYFVLNYNYCTELETRVCGTFAYAAEAQNFKATAEALMPYFLG…	599	85	85	600	9200	4900	15.3333	somatic cells
phDZ1	-	77905 (Volvox v1.0)	Hallmann 2003, Ender et al. 2002	39	183580	190822	-	1239	MYGGGKYCFTIKVQTQGCNNACCSTDLFKIEFNVSDSCLVTPAAEVKATINGRPTTVGAAYDRPINGRAGTAILRLTRLDLTLATAADAELCLTLKANRQGKGCTTLDQMCATQPGAMKGTCTAALYDTPCQCCPVSTVIGYNPPPPSPPPPPPLPPSPPPPSPPPPPPSPSPPPQVSGRSVSNPDPPPLTALRTHRPSLASWPSPPPICEPGEKPELGVHIPPQESQPAAPDEYCADVEALAPQNALVWSKKRWESPAASTRKAIYEDLSRETPDPRLRRPNWWQLNQKECSLPIRLCGVFASSVYAEDFKLTAEGLLSYWIEAASGGNVCSAELEGYTVQVTTDGNLCLPLLSSVSCNLPFTPFPNCTCNTTQGILPFTVSPRFTTGNRTATTTEYC…	523	32	32	400	4000	2200	10	somatic cells
phDZ2	-	90188 (Volvox v1.0)	Hallmann 2003, Ender et al. 2002	4	921000	931000	-	5000	MRHFRRQPFLPFLPPRAASADAQDFYYGDYDVALGEQTGFVPNFPYRECATRIGAYRLGPEVKSLGGGKFCFTIKVQTQNCNNACCNTDLYKIEFNVSDSCIVQPAADVKATINGVYTRVGAAFGRPVNGRNGTAVLRLTQLGLDTTSAQNAEPPAIDVRPYRYDNRTCFTIQDNIANYINGALYQNGVDMLSYFAPVAALCSDLEVRVCGTFALSADAQAFKATADGLMPYLIQQAAGGGSVCKPELEGYTVEITTEGSTCLDLSSSLACSLSPTPFPGSTCNMTQGTLPFTVSTRYSVADRKPNTTEYCFTVNTITPDQIVPSACGSGSASNGVLTTVEWYASQAMGTLVKGLNVYPAGGTKATLPVSWGPMGTNTLRVLCEGVRHQQRLLPRLPFR…	425	0	0	400	4000	2200	10	somatic cells
ssg185, ssgA	Vocar.0002s0564	Vocar20002814m	Ertl et al. 1989, Holst et al. 1989, Tam and Kirk 1991a, Tam and Kirk 1991b, Tam et al. 1991, Mengele and Sumper 1992, Sumper and Hallmann 1998, Hallmann 2003, Nematollahi et al. 2006	2	4191410	4198020	+	-	MSKLLLVALFGAIAVVATSAEVLNLNGRSLLNNDDPNAFPYCKCTYRQRRSPYRLKYVGAENNYKGNDWLCYSIVLDTTGTVCQTVPLTEPCCSADLYKIEFDVKPSCKGTVTRAMVFKGIDRTVGGVRVLESISTVGIDDVTGVPGAAILRIVKDLALPYSVVASFLPNGLPVCINRVPGSCTFPELFMDVNGTASYSVFNSDKDCCPTGLSGPNVNPIGPAPNNSPLPPSPQPTASSRPPSPPPSPRPPSPPPPSPSPPPPPPPPPPPPPPPPPSPPPPPPPPPPPPPPPPPPSPSPPRKPPSPSPPVPPPPSPPSVLPAATGFPFCECVSRSPSSYPWRVTVANVSAVTISGGAGERVCLKISVDNAAAATCNNGLGGCCSDGLEKVELFANGKCK…	485	40	40	7583.53	93472.6	50528.1	12.3257	somatic cells
phV1	Vocar.0034s0104	77332 (Volvox v1.0)	Prochnik et al. 2010, Hallmann 2006	34	1022025	1028496	+++	-	MAKTSNMWNAVAAALALTWVAIAVAQYDEDFTVYRDQTGAFPNFPFRNCETTNGAYQLAPVWQHVGSNKYCFRIQVRDPSSCTGACCNTDMYKIEFNVSSSCLVAGASVVATVNGAPTRVGASFDKPPTGPPGSAILRLTQLGLDTTTAQNAEVCITLRTNRGGQGCTTLEQLCSSPGFSAGTCTAAMYDTACDCCPTSRASKYYPPPPPPPPSPSPPPSPPPPPSPPPPPPPPPPPSPPPPPPPPPPPSPPPPPSPPPPSPPLPPPSIPSPPFAFGFRPFCDVCIKAQLLAPFPDVRPFRYSSTMCSAIQQKIADSINALEQDPNLGFVYRIPFAPNDTRCTETQAVVCGSLYQPVNDTDAFKEKLSRSVSDQVLFWLDAATGAASICSPELDGYQVT…	590	62	62	14159	156488	85323.3	11.0522	somatic cells
phV2	Vocar.0073s0006	108351 (Volvox v1.0)	Prochnik et al. 2010, Hallmann 2006	73	33011	41407	++	-	MANGDNHLQKLMQLDIQKMKLTNVLCIAVAVSLLAGAQAASFPYSSVCAQQPAVYSVESTIIERPNNTYCFKIAVNVPANCAGYCCSADLYKFELSINPICKISGAKLSSTLNGKPTPTQPSIDKAPNEPAGAILRIPNLGLKMSNADGAEICVSLGTNSAGRGCLSLEQLCKPPAGGAPGTCETALWDSKFKCCPTDVTVPNSPLLPPPPINCTCDYKAGSTPFTVGAAATATPTTSGTTVYCLPITTTDTFTPAGCGPVDILHKIEMYANQDQRAAIKSLKLVSGSTTTTLAASWNGANSNTLKFTPINWTKAQAANSKVCVELKNPTTLSDFCLGSKCYLFIFNANRACCPMYTVPV	360	4	4	3698.72	10291.9	6995.33	2.78257	somatic cells
phV3	Vocar.0013s0116	Vocar20007321m.g	Prochnik et al. 2010, Hallmann 2006	13	1038369	1043776	+++	-	MADTASAEVTIFGTLQKWGGSMMTFAQQSFNSLMGWEDLEVVDPEAEKAKKGEETEANGLLEQERKQAWGTRQFQQYIGADVTSLLSVPVWIMEPFTILQKAAEIMEYTDLLDNADTTADEFDRFAWVAAYCVSPFGAAERAWKPFNPILGETFELAVGDNVRYLAEQVSHHPPICAAHAENGHFRYDLVSAPTTRFLGNSLEVYPYGRTRISLVRSGEVFTLVPPNAMVHNIVIGRTWVDAYGPMTINCITTGAKCRLNFKPCGWFGYGRYQFEGFVYDKEGNKRVMLTGKWNQYVDAVRCDFSDAPLPGAEVRRLWTCTPKPVSDYYSFTHFAHKLNSSEGIRTPLPSDSRRRPDRSKLAAGEMGSAGSEKVRLEEMQRAERREREKRSDSWAPRWF…	468	0	0	4618.6	15342	9980.31	3.32179	somatic cells
phV4	-	77335 (Volvox v1.0)	Prochnik et al. 2010, Hallmann 2006	34	1015250	1020018	-	-	MASFAKAAFILATALAVGWALSAHAQEYNEYDPSAVTPGSIPNFPFRNCNTTNGAYRLAPVWRPSGINTYCFKIQVSQDALSCTGACCSADLHKIEFNVSSSCLVAGASVVATVNGVRTRVGATLDKAPAGPVGSAVLRLTQLGLDTTTAQDAEVCLTLKTNRGGQGCTTLEQLCSSPGFPAGTCTAAMFDVACDCCPVSQAGQALPPPPPVIPPVLRPCDVCIAATIVPPANDVRPYRYDSATCAAIQQNIANAMNSLLGGANINVFSPFAPNASQCFDTQIITCGRFNGSDTDALATLTGAVQQQLPAFVEIASGGSVCNPKLEKYTVTVSTINNVADQCLDLSQSASCFLPGVPFPNCTCNTTQGVMPFTVSPTWYAQPANVRWGRNVTEYCFTVN…	518	5	5	3000	28951	15975.5	9.65032	somatic cells
phV5	-	77338 (Volvox v1.0)	Prochnik et al. 2010	34	978514	973908	-	-	MASFAKAAFILATALAVGWALSAHAQEYNEYDGSAVTPGSIPNFPFRNCNTTNGAYRLAPVWRPSGSNTYCFKIQVSQDALSCTGACCSADLHKIEFNVSSSCLVAGASVVATVNGVRTRVGATLDKAPAGPAGSAVLRLTQLGLDTTTAQDAEVCLTLKTNRGGQGCTTLEQLCSSPGFPAGTCTAAMFDVACDCCPVSQAGQALPPPPPVIPTAIRPCDVCIAATIVPPANDVRPYRYDSATCAAIQQNIADIMNSLLEAANVGAFKPFAPNASRCFDTQIITCGRFNGSDSDALALLTEAVQQQLSAFIEIASGGNVCNPKLEKYTVTVSTINNVADQCLDLSQSASCFLPGVPFPNCTCNTTQGVMPFTVSPTWYAQPANVRWGRNVTEYCFTVN…	533	5	5	2800	26646.9	14723.4	9.51673	somatic cells
phV6	-	107455 (Volvox v1.0)	Prochnik et al. 2010	34	951989	954029	-	-	MENLTASALMLATVLAIGWAVGANAQDYEYEGSAVTPGSIPNFPFRNCNTTNGAYRLAPVWRPSGSNTYCFKIQVSQDALSCTGACCSADLHKIEFNVSSSCLVAGASVVATVNGVRTRVGATLDKAPAGPVGSAILRLTQLGLDTATAQDAEVCLTLRTNRGGQGCTTLEQLCSSPGFPAGTCTAAMFDVSCDCCPVSQAGQALPPPPPEIPPVRRPCDVCIAATIVPPAIDVRPYRYDSATCAAIQQNIANIMNSLLGAANVGAFSPFAPNASQCFDTQIITCGRFNGSDSDALANLTEAVQQQLPAFVEIASGGNVCNPKLEKYTVTVSTINNVADQCLDLSQSASCFLPGVPFPNCTCNTTQGVMPFTVSPTWYTQPANVRWGRNVTEYCFTVNT…	521	9	9	1400	11747.6	6573.81	8.39115	somatic cells
phV7	-	108791 (Volvox v1.0)	Prochnik et al. 2010	34	993861	998402	-	-	MASFAKAAFTLATVLAVGWALSAHAQEYNEYDPSAVTPGSIPNFPFRDCNTTNGAYRLAPVWRPSGSNTYCFKIQVSQDALSCTGACCSADLHKIEFNVSSSCLVAGASVVATVNGVRTRVGATLDKAPAGPVGSAVLRLTQLGLDTTTAQDAEVCLTLKTNRGGQGCTTLEQLCSSPGFPAGTCTAAMFDVACDCCPVSQAGQALPPPPPVIPPVLRPCDVCIAATIVPPANDVRPYRYDSATCAAI	247	13	13	3000	25501.3	14250.7	8.50045	somatic cells
phV8	-	63512 (Volvox v1.0)	Prochnik et al. 2010	17	188530	194947	-	-	GEIANFPYRDCTTARGAYSLAPDVASLGGGKYCFTIQVDQGCSGPCCSTDLQKIEFDVSSSCLVSGASVIATINGKRTQIGASFDKPEMGPPGTAILRIPQLGLNKTTAQNAELCITLKPNNAGRGCTTLEQLCSTPSGGCPGACSAAFFDTPCKCCPISNTRGRSCTPLPPPDPPVFCTSQVCYIAELEPPTPDVRPYRFDDATCTSLKVQLGKASQAINVGSDTLASYLDLVLRVCEGTRVVMCSNFTESNVTDAAWKTAFAGANTELVTFFLSLISGPTCLPELDGYTIRTRANSEKCVLFDEERSIPCVPPPGVNCSCDVKQGVLPFVVGARYAPAASLPPSKVPTTDYCFTISTTTNIAPSNCTSISTIGKVELIADPSLRAFVRGFTLYLNNG…	469	8	8	200	300	250	1.5	similar in both
phV9	-	75691 (Volvox v1.0)	Prochnik et al. 2010	17	220452	227725	-	-	MEKRIIHFLFLSTLAVGWAIGADAQEYDYDPSRVQTGTTPDFPYRKCNTTNGPYRLNPVWRFVANRIYCFTIQVKLDPLSCSGPCCNADLHKIEFNVSSSCLVAGASVIASVNGRKTMIAPAFDRPATGPPGSAVLRITNLGLTTETAQNAELCLVLRTNRGGQGCTTLQQLCTSAGLPAGTCTVATYDAACDCCPQNIVVEPQPPPPPPPPPPPSPPPPPPPPPPPSPPPPPPPPPPPSPPPPPPPPPPPSPPPPPPPPSPSPPPPPPSPSPPPPPPPPSPPPAPPPFVPGFFDCELCFAAELTPPTDSAPYRFDNATCTAFQTAVSEDMNSILQNFNVTIKSPYPNSTSCTGTQAIVCGKFLKGDLALLEQTVRSEIYQKVVKWLAIITGEGECKPQ…	606	89	89	30	450	240	15	somatic cells
phV10	Vocar.0004s0117	104451 (Volvox v1.0)	Prochnik et al. 2010	4	987729	994364	+++	-	MKLRASVAVAIVGILYYVNQGHAQTGKFPLFPYCQCNTSLPAAYSLEPAVVAKADDTFCFKVKVKIPSGCTSYCCTRADLKKLELNVNPDCKVPGVSAVATVNGVRTKIAPVIEKASQGPPSAMILKLTQMGLNLTTADGAEICITLKPNRAGQGCTTLQQLCVPPPGYPNGTCSAALFDTLDDCCPLKEVNVNPCKTCVYFSLTPYGSISRPYSFTPSQCASLATVVANDMKNQADGNDAAISTNFSLVSCEGTQVKICGDFMSDADGAKLKPFIDDMAISWLSQVAGNLSSSCPVALSNYTVSVAVGGNGTDIGSLPPSCLDAVKSTACKPNPFPFPKCVCNITQGVSPFAPSDLITELPGRRSRSILYCFLFKVVDAIPGQFCTNATTFQKVEFWA…	495	0	0	857.709	236.798	547.254	0.276082	gonidia
phV11	Vocar.0004s0116	Vocar20010802m.g	Prochnik et al. 2010	4	971078	977179	++	-	MRLPILGTLILAASLLAVSEAQTFGSGLFPNFPFVACQRSQSAYKVASTVTSGGSNTYCFTLRVSVPDNCASYCCQDADLRKFELNVYRKCDISGIKLRATLDGAPAKTVPTIVEALDGKNDSTILRLPALGLNQSTADGVELCITLGPNSNGEGCLTLEELCVPPEGFPASTCTTALFDTQNDCCPLSRVTVPPPSPPPSPPPPLLLHGTVVQTVPGAVPFIFSQADCDSFAATVSSGMDGLSIVAVVRPFELQLCSDSVVKALGGGTCPAYLLGQTIRVNIGGDGDPINPPPSCGVSVTKAAACSLPTAADGPACDCNSRQRATPFAMVPVYTEKKGRFANTNMYCFDFLTIAPEFPNGPCGSTTTLAKVEFWVDDAYRRNLTSVGVQPSDATRMTW…	470	12	12	1551.72	29337.3	15444.5	18.9063	somatic cells
phV12	-	59555 (Volvox v1.0)	Prochnik et al. 2010	4	959957	965960	-	699	MGEQTGSIPQFPFHMCAAKTGAVGAYSFAPVVEAKGGGKYCFTIKVLQGCSSPCCTVNLHKIEFNVSTSCLVQPAAEVKATINGVYTRIGPSFDRPLNGQNGSAILRLTQLALDAVTAANAELCITLKANRGGQGCTTLEQMCVTPPGAQAGVCVAAMFDTTRTCCPISQTLPSITPLLVNPPPPSPQPPPPSPQPPSPPPPSPPPPSPPPPSPFTLDTCGAIQQRISTTLNAAIAATGMTMFSEFEPDWARCSELEVGTCGTFNSPETAQVLVNVTQDLMPGWIAEAAGGDLCSTELDGYKITVTTNDDSCVFFTSTSSCAKTYAPFPTLTCNKTQGVLPFAIDPRYYPLPDQPGKTTSDLCFMVKTLSPEQIVPASCGQTGDNLARIEWHAFQNMSS…	499	33	33	700	8157.23	4428.61	11.6532	somatic cells
phV13	-	127206 (Volvox v1.0)	Prochnik et al. 2010	34	1008160	1013000	-	1218	EYDGSAVTPGSIPNFPFRDCNTTNGAYRLAPVWRPSGSNTYCFKIQVSQDALSCTGACCSADLHKIEVRPRPADGVGDATCRHSATGSTCYNANDALAKIEWYLACVSMTAGDAFRSAVKGFTVYPAGGSNKTIADSWGATGTDTLKVNLNWNLLQANGGKVCVAIQNPFTMGDICKGALGYASIFNRDNSDYCCPIYRTGP	201	0	0	4500	39007.1	21753.5	8.66824	somatic cells
phV14	-	80812 (Volvox v1.0)	Prochnik et al. 2010	4	909151	916356	-	-	MARTLIALAVAAVIAIAWAPTADAQDEDFDAPFGEQTGLIPNFPYRICNTQVGAYRFAPEVKHLSGGRFCFTIKVQTQGCTHPCCFADLYKIEFNVSDSCIVQPSADIKATINGNYTRIGAAFGRPVYGRNGSAILRLTQLGLNTVTAANAEVCLILKANRLGKGCTTLEQLCVPPPGAARGMCAAAMYDTPCDCCPPPSLPPPPSPPDITPNPVCRVCIIISLLPPSFDINRYRFDNRTCSSIQDYIAASINASIVSNNIPMQSYFAPNASLCSPLEIRVCGTFVDANGANQLKAAVELQTQFWIKFVAGGEVCRAELDRYAIQISTEAGSCLPLIDVESCNLDFKPFPNCSCKTRQGILPFTISPRYFPLKNKFTTEYCFVISTLPPDQILPSTCRM…	512	12	12	1.66667	7.33333	4.5	4.4	[expression too low]
phV15	Vocar.0004s0257	80731 (Volvox v1.0)	Prochnik et al. 2010	4	2037429	2045105	+	2670	MSDIETCDFYRHCPKLLRYQSEISFIKIINFKCKELLNFCNIMVGVVHHFAAARVHLSIRENVSQQAIINIRCFCNNMKRGALLLLFAVARTVVADAQQSGAIPTFPYFNCARWISSYRISPNFKAYGGGTYCFTLTVKSPPGCTSYCCTKSDVKKIEFNVRRECNVLGAVIKSTVNGAPTRIGPAFEYPPAGPPGSAILRLTQLGLGPGDDGAQVCLTLAANALGRGCSTLEELCVPPPGRPGSTCSVALFDSQLDCCPISTVSAPIPQTPPLLAGRDGPLQPPPSAPPSPPPPSPPPPLPPLPLPPPPPPPPSPPPPSQLQLSPASPFTPSCKTIESCPQSKTTPAFNQPPYLDITAWPSRKARTVSAPSLPPPPSLPTAPPPPQTSSTPSSQPLSP…	747	36 + 65	101	115.593	529.374	322.483	4.57964	somatic cells
phV16	Vocar.0073s0007	78132 (Volvox v1.0)	Prochnik et al. 2010	73	58936	64608	+++	-	MSLIIMKPNNFVVVALALGLLASHRAASLPFPYTTCQQEPAAYSVSSVVTTPSANTYCFNISVNIPPGCAGYCCSADLKKFELNVNSECKVSGAKLSATLNGKPTPTAPTLDRAPNEPAGVILRITNLGLNMADADGAQICVTLGTNSAGRGCLSLEQLCKPPAGGAPGTCETALWDSEFDCCPIDVVGAPTPPPPATLTPEPCPVCINAILTPPLIDYRPFRFDAESCRTFQEFVASKINGLIMESNTPHVSLFTPNASLCQPFQMSVCGTFASADAAKSLEEAVLELGPLFLLESARGRPCHPVLEGYGLTITTLDSPGVDPAAPLCMDVSVAQGCFVPPSPPVNCTCDTSKGSLPFIASGAYAETSLPGLTKYCFKTIVFEDLPPSPCSPTDTLQK…	498	6	6	5132.51	14798.9	9965.69	2.88336	somatic cells
phV17	-	100178 (Volvox v1.0)	Prochnik et al. 2010	73	46065	51588	-	-	MLQLCSVDLYKMKLINIFCVVLAAGLAAHAGAQMMPWPYNTVCAQQPAIYSVVPQVTERPNNTYCFKIAVNIPPNCAGTCCSADLYKFELNVDPSCKVAGAKLSSTLNGKPTPTQPSLDKAPNEPAGVILRIPNLGLKMSNADGAEICVSLGPNAAGKGCLSLEQLCKLPAGGAPGTCETALYDSKFKCCAIGQPSQPTPIKPPINCTCEYMAGTTPFTVGSGAATATPTTTGTTVYCLPITTTSTFDAAAPGIQTYAHGAATSPSLQGGCGPVDVLHKIELYANQAMSSAVKSLRLVTGSTSKTISASWGGANSNVLKFTPINWTRAQAANSKVCVELKNPAKLSDFCIEDRCYLFLFNENKACCPMYTVPV	373	0	0	250	6528.23	3389.11	26.1129	somatic cells
phV18	-	80872 (Volvox v1.0)	Prochnik et al. 2010	-	-	-	-	-	MTSNGTEICLTLKPNRAGQGCTTLEQLCVPPNGMAPGSCLTAMFDTTLDCCTTSRTGTNVASPGTPPPSPSPPISSCDMCIDLTIDPARVFPPYQFDSFTCEVVQTSISYDINEKAASMGLMLAQNFSVDASKCSSDKIIVCGKFASESDAAQLEEWTRIQAEQFWLYSFASACTPVMYGYSFRITTDKCMDVVKSRTCSLVQSDFPFCGCQRKRYSTPFYVSPSASSEQGRTSDTTLYCFTLGVLPNEFALLPGRCNSSSKVAKVEIWANEDRRGKLRGFRLSTPDGKTRWLSPSWGDKGSNTAKVSGLTWNRATANGAEICMELKNDITLQEFCVSNVW	341	-	-	-	-	-	-	[expression too low]
phV19	-	83847 (Volvox v1.0)	Prochnik et al. 2010	34	1050020	1054000	-	-	MSLCNYAKVTVCGRLRLRDRVALENALEQKARHWITLAAGYDLCDPELQSYSVSVTVGEHTYAMGTSCDLTPTAVTTRICDPSQGGLPYIVAPRYFLLAQTNNRSSTNEYCFGLSTWAAEGDSLSRMEWYANRSLSAWVAGFTLYSSTGNITALPARWATGSNGSTDILQANEINWTTTQANGAMVCVRVKKPRTLQQLCFEDRLCYVSLFGSSGDRCPTFKTALRQT	228	0	0	2	13.3333	6.66667	6.66667	[expression too low]
phV20	Vocar.0029s0041	42640 (Volvox v1.0)	Prochnik et al. 2010	29	425310	432942	+	-	MGLKAVEMTRLFWIAATFMALLWGLPGARAQPPPAAPVVASSTQIGLITYFPYFECIRIPASYSLAPVVTYKGSGQYCFTILAASCTRNQCCNRDLKKIEFNVYDSCVVSGASVSATVNGVPTKVGPSFDKPYNGPVGSALLRVTQLGLNMTSNGTEICLTLKPNRAGQGCTTLEQLCVPPNGMAPGSCLTAMFDTTLDCCTTSRTGTNVASPGTPYPSPSTSPFPPSPSPPSPSPPSPSPPSPSPPSPSPPSPSPPSPLPPSPSPPSPEPPSPTPPSPKPPSPSPPSPSPPSPEPPSPSPPSPSPPSPSPPSPSPPSPEPPSPSPPFPRPPFPSAPISSCDMCIDLTIDPARVFPPYQFDSFTCEIVQTSISYDVNEKAASMGLMLAQNFSVDASKCS…	627	125	125	193.071	51.6413	122.356	0.267473	gonidia
phV21	-	90431 (Volvox v1.0)	Prochnik et al. 2010	29	141780	146110	-	-	MAPPLLLVASALALAWACGATAQVAPVELAYTQTGAVPYFPFFLCARAQASFSLAPVVTNVGGGQYCFTLLAVPCNKTCCNVPLKKIEFNVYSSCLVPGASVSATVNGVPTAVSPSFDRPQDGPPGSSILRVTQLGLNLTSNGAKICITLKPNSAGQGCTTLEQLPPSPSPPISSCDMCIDLTIDPARVFPPYQFDSFTCEIVQTSISYDINEKAASMGLMLAQNFSVDASKCSSDKISVCGKFASESDAAQLEEWTRIQAEQFWVYSFASACTPVMYGYSFRITTDKCMDVEKSRTCSLVQSDFPFCGCQRKRYSTPFYVSPSASSEQGRTNDTTLYCFTLGVLPNDFALLPGRCNSSSKVAKVEIWANEDRRGKLRGFRLSTPDGKTRWLSPSWGDK…	462	7	7	11.6667	1	0.0857143	0.0857143	[expression too low]
phV22	Vocar.0024s0217	94616 (Volvox v1.0)	Prochnik et al. 2010	24	1606820	1610491	+	-	MWWPCSIPLVAFLRSHRRPAWLPCLFACRPLAVLFEMRLQQRVFLFVALVIWAGFAQISEAAPAGIINPEFPYCKCKAAPSAYKLDNNARFQGNNTYCFTVRVSVPANCTDYCCSRADLYKMEVDTKAECHVPGVVMSASLNGVRTQRRPTLERAPQQSTNRSAILKLTALGLNLANTDGAEICITLGTNRAGSGCTTMEQLCAPKMDDSRSLCTVALFSSDTDCCPTAGVGLPPSPPPLPPQLPPPTPLPPLSPSPSPPPPSPSPPPPSPSPPPPVPPPTSTSPLPPPAFPHPLPPTPPPPPPSLSFTSLPPSPPQSACATCVTFRLFPNNAIPYNLTNEKCKDYIRAVVERIADYAAVNYGANFTMTAEGCYNDSAFACGSMNRNAIAVAASPVGHL…	631	71	71	8.65625	63.3226	35.9894	7.31525	somatic cells
phV23	Vocar.0024s0151	94560 (Volvox v1.0)	Prochnik et al. 2010	24	1115594	1122017	+++	-	MQVAGALTLVLLASLGHLLLAADLVGLFPDFPFCECDSNGAYDVVNPYKYRGNNTYCFTIRVLRRPGCTSYCCTQADLKKLEINTYSSCDVPGVLLSATLNGAPTVVRPNFEAAPQGAVGDTILKLTRLGLNLTTADGAEICITLRTNRAGKGCTNLEQLCVPPPLSVMDRGACSIALFSSNNKCCPVDVPSSPPPPPSPPPPPPPVPPPPPPPPPPPPPLPPLPPPPPPPPVPVVFSECQTCVNLKIYPDERPGIIPFVITPELCENYSSTVISRMTAASQMVGAFISNPLELKVCNKDTIIICGAFKTVDPGNSAVPVFLSNTGNELATHFLNTLIPEECPAYLNHHTIEVTIDGLLSIPPLIDDNGIAGMPNTCISGLATENCELDVLFPNCTCLM…	554	44	44	1729.25	465.555	1097.4	0.269223	gonidia
phV24	-	127208 (Volvox v1.0)	Prochnik et al. 2010	29	60614	61500	-	-	AYTQTGAVPYFPFFLCARAQASFSLAPVVTNVGGGQYCFTLQFNVYSSCLVPGASVSATVNGVPTAVSPSFDRPQDGPPGSSILRVTQLGLNLTSNGAKVCITLKPNSAGQGCTTLEQLCVPPNGMAPGSCIAAMFDYSLDCCPITR	146	0	0	0	0	0	-	[expression too low]
phV25	Vocar.0029s0006	101351 (Volvox v1.0)	Prochnik et al. 2010	29	49517	54230	+	452	MAPPLLLVASALALAWACGATAQVAPVELAYTQTGAVPYFPFFLCARAQASFSLAPVVTNVGGGQYCFTLLAVPCNKTCCNVPLKKIEFNVYSSCLVPGASVSATVNGVPTAVSPSFDRPQDGPPGSSILRVTQLGLNLTSNGAKICITLKPNSAGQGCTTLEQLCVPPNGMAPGSCIAAMFDYSLDCCPITRTATPPSPSPPSPPPPSPSPSSPSPSSPSPPSPSPPSPSPPSPSPPSPSPPSPSPPSPSPPSPLPPSPTPPSPSPPSPSPPSPSPPSPSPPSPSPPSPSPPSPSPPSPSPPSPSPPSPSPPSPLPPSPSPPSPSPPSPSPPSPSPPSPSPPSPSPPSPSPPSPSPPSPSPPSPSPPSPSPPSPSPPSPPDVPPCSTCFDLEVEVSSA…	659	189	189	6.07637	0	3.03819	-	[expression too low]
phV26	Vocar.0048s0012	107546 (Volvox v1.0)	Prochnik et al. 2010	48	409032	413326	++	-	MSGPCHAMRGIYISTLAVVFLFCASSHGSDIGSGRLLLPNPEFPPRCSCIRNPRAAPFVLAATSNDPVVGAQRVCFTITRSAVCEAKFQCCNGAQGVTKIEFDVVSSCRPSLQRVTVNKQPWGSYEFNGQLSVLRVTKLDLTPATAPGTQICFFLQSRTPCPNIRTLCTTGDASCTYAIFNSDPGQNITNKCCPVAVASFIPPMHTPTAPAIMRPPPPSPSPPPLPSLPTPPPPLVPTSPSPPPPPPPPPPPPPPPPSPLPPSPLPPPPPPQLLPPPPPPPPPPPPPSPSPPPPPPPPPPPPSPSPPPPPPPPPPPPSPSPPPPPPPPPPPSPPPPPPPPPPPPPVPSPPPPPPPRPYFANCSCVRDPVKSQLFVYPDVVVVPARERGYTKMCFTIGTL…	516	143	143	504.915	257.692	381.303	0.510368	similar in both
phV27	Vocar.0048s0011	67890 (Volvox v1.0)	Prochnik et al. 2010	48	402813	407369	++	100	MAETARRSCVCIAATVAIWLLLAPVLVMGAGSDSGNSTRPPFPPLCNCIRSPNASPFILNGIPPSSSGDYQKHCFAITKTSSCTPKLQCCNGRQGIYKIEFDVVSSCRPSLQRVTVNNQTWGSWEFNSQLSVLRVTKLFLSPAGAPGTQICLFLQKRTPCTYLSDLCSAGDGICKYAIFNWDTAGGSTNDCCPVRVTALSPPPPPFEQVSALPPPPQPLPPPAAPPPPSLPSPPPPSPLPPSPPPPSPLPPSPLPPPPPPSPPPPSPPPSPSPPSPPPPSPSPPSPPPPSPPPPSPLPPSPLPPPPPPSPPPPSPPPPSPPPPSPPPPSPSPPSPPPPSPSPPSPPPPSPSPPSPPPPSPPPPSPLPPSPLPPPPPPSPSPPSPPPPSRPPPSPSPPSP…	503	222	222	1784.09	1169.64	1476.87	0.655592	similar in both
phV28	Vocar.0048s0016	Vocar20012102m.g	Prochnik et al. 2010	48	436341	439989	+++	-	MTKCSSSCSSSVATAIVLTTSVLLLFTPTAAAAASADNRLANLRGIGSIKQQQQLKLHSSTFTLPSISNCERDAAKSPLRLSFDAAASGLEFGGTIQRYCFRIRSTAGCSLPSRCCGSSSRTASKIEFDVVAGCKDSLRHVTVNGQPAVYEYDTALSMLRVTDLNAPTSTIATAASDTQVCVLLDTASSCPSLATFCGRHDGASTAAGACRYSIFSTDGNCCPISAVSTAVPLPLPASTIDLPSTTVFRSDFPYCQCQRNAAGSRLFAVASLDANPNVDNGLTRICFDVGLHDVCADPTSKCCEFTLYKMELEVDRACADALAYTTIDGIQHVRYFQTAPHAAIKIVNLDRPLSAVNGTQVCLFLRPECNTLEKLCAFHDGSCTVGLFSKPGTGAANCC…	406	0	0	275.285	89.6295	182.457	0.325589	gonidia
phV29	Vocar.0048s0010	Vocar20012088m.g	Prochnik et al. 2010	48	396869	401014	+++	-	MAVPFQPEKSRLAPSGLALLAMGVLLFSTPARSTDGRQLLQAITDFPPGCKCDRTSESSPYQLVYDQEGSTPISGFNRHCFYIQKASCNASSVCCNASSGVYKVELDVVPACKQALKRVTVDGNPYSAWEFNAALGMLRVTRLNLTEISAPGTQICYFLKNDTACSTLAKLCALGTGACKYSLFNFQRDCCPVGVANPPPPPPSPPLPAIVPGSIRPVPPAPLDQPPSPPRSDFPDCVCERDPDGSRLYLKPNITITPAEKNLTSICFTVGMRDVCSKPELGCCEFTLYKLEFEADAACAPALAYSTVDGERRMRLFQFTPYPAIKVTGIGKDFSRAPETEVCLFMKPRCNTLQQLGAFHDGTITVGIANKPGSKPATCCPLFYAGQ	387	33	33	21.1245	327.087	174.106	15.4838	somatic cells
phV30	Vocar.0048s0013	Vocar20012070m.g	Prochnik et al. 2010	48	417685	419806	++	-	MTARCLRDFISIVVVSALAITLSVGGANGALDTIRSRQLLQATSEFPPNCVCERNASSSPYRLTPSNATSTTDFSVYCFKIEKTGCNSTSTCCNGNQGVMKVELDVVPTCKPSLKRVTVNGVFYTAWEFNTKLGTLRVTSLNKTATTASGTQVCLYLTKSNTSCTNLAQLCALGSGACKYAIFNADRNCCPVSVLSYFPPPPPPQFGPVVPAFSKPPTPPNPPEPSPPPLPPSPSPPPSPPPPSPPPPPPPPPPPPPPPPPPPPRPPPPPPPSPPPLPPPPPPPPVFPNCSCLRSPSASRLALSPEIKVSPADNGLTSICFTVTSKDSCDRGSRCCTFTLHKLEFAVKPSCNNTLIYATANGEHASRVFQTRPYPAIKVTNLALAFGDTEGAEICLFMR…	437	87	87	5.94063	0.771952	3.35629	0.129944	[expression too low]
phV31	Vocar.0012s0209	104151 (Volvox v1.0)	Prochnik et al. 2010	12	2002550	2005915	+	50	MTGCLRRAAGALLLLAGCLSLVPAGWALDVDYTPETTAEALATFPYCKCNDYRTRASPYRLRLSGASKNTAGTLAKICYTIDMPGCYDDTNECCKLIYQRLEKIELEVKSACQKDVKQVTWNGKSRTFYFITQYATGVLRIPALAITNGGASGSSLCINVNTTSTCATPSGLCEAGDGTCKFTTFESSNHLCCATGIDGVPKALPAPLRGPATPPSPPSPSPPPPVRL	228	25	25	60.0456	4.91971	32.4827	0.0819329	gonidia
phV32	Vocar.0004s0231	104390 (Volvox v1.0)	Prochnik et al. 2010	4	1880173	1882854	++	-	MENGNQLERFANGEALLQEDVGPRAPGLRLRAANRGTRGTLKLAIDITSSLSRPGLGVSVPDMLSQSGSEAPRPVIQLRYFSCHPFNLIYRMSLQTIFGLPGETIGTIPMLYSNYELEVVLRTANSSGAPRNWTDPHAFASQEPTAAYMYAAALLTLPRTTLLYAWLHDHNGAYKLLRNVHVDVMCTVSVPSRVKLTVPEPWSAVHKRYVPRFGCVATKSGCARCFFPETGFISMAASTAMQEALDKLTMGGLNVALRAVGITEFGSSAASEHTTPTSSSVSKSSVAAAEVAGAVPVAGASQTAQGLGPLLWPLMVACPGLVTCYLALALVETAPLAAGWIFFTGLLKAFCELRVLIHSGMLAWRRRPQAAVHSLACSHGVPFMLGCHALLLLRLAGAL…	579	-	0	743.783	36.6728	390.228	0.0493058	gonidia
phV33	Vocar.0033s0185	95611 (Volvox v1.0)	Prochnik et al. 2010	33	1463693	1467353	+	1548	MTARVVDCAKPGSDCCDPKIDFYKIELDVNKQCKGAVTGVTVNGKPALAPTFDPYATNDTKAVIKLTGLNLDLTTADGAVVCMTLGGSCPSMETLCAEGNGFCKYAVVQSGTCDCCPVGKLGFFAPPPSPLPPSPLPPSPLPPSPRPPSPLPPSPLPPSPLPPSPSPPNPLPPSPLPPSPRPPSPLPPSPLPPSPSPPSPLPPSPLPPSPRPPSPLPPSPLPPSPLPPSPSPPSPLPPSPRPPSPLPPSPLPPSPLPPSPLPPSPRPPSPLPPSPLPPSPLPPSPSPPNPLPPSPLPPSPLPPTPLPPTPLPPSPSPPSPLPPSPLHPSPPSPLPPSRPPPFAPPFTPVRIRSPFPFCDCNRTLPGLVPFTFDKTPSLSLNGANRRYCLTLRTVPCADP…	510	223	223	10.9544	28.4212	19.6878	2.59451	somatic cells
phV34	Vocar.0004s0369	107649 (Volvox v1.0)	Prochnik et al. 2010	4	3109102	3111448	+++	-	MINVLDSEAVVANALLKDFQLTACGKLYVEVCGNVSNAGSLNNTVRELALKLVNVVIFNRSAVAYNCPAGQYRNYNFSATIAPVNASAETDPKCISGFTQMQCSDRLQPNAPAPRTPPRPPSKPLVPPSPPQPPRPPPAPQGVMTHKCDNGSTNVPYKLNNIEISKGKDVFGNPTIAMCTRISSQACVNSTNSCCGMSLAKVELLVNTACKDNVRKITINGKDLPPSWAFYNIFNGLKFTDLDTLIPRASGATLCWHVKQTTTCNTPSSFCYLGRCQVNQFSPNNKCCPINFI	293	32	32	633.874	19521.2	10077.5	30.7967	somatic cells
phV35	Vocar.0005s0504	127252 (Volvox v1.0)	Prochnik et al. 2010	5	4082284	4086243	+	-	MRSFTILPLLCICFFIGNVVDGRRTLFQPSFGNVFPNYPCQTDASLSPFKLEPLYTTSPSANGQRICFTVAPVQRCPAEEPCCSQADFYKLEIRVRPTCRRAIRSVTVNGLPAPTPTFEVYGLARDMALFKLPRLNLTTTNATGAKICITLRDPCPNMAALCPEGDGSCTYAVGQSAIPHKCCPVNKLSLPPPPPPAVPLIPGVSIPPPPPPPPPKAHVRAAAAITGSSSASSSSSAQSRRPAPYTGTFPYTSNCNQTSGLMPFRLAAPVLSRTISGGNVYCFSLESSTCADPSSSCCSSNLLRVDWWSYDTCRGSVRAYVDKVSYPVTWDQGGTFRLTKLNYSRDEVASRPKQLCIELRKDGPCDTLGRFCRLGESSGSCTYALYDGAQTCCPTGATP…	403	25	25	13.7662	0	6.88311	-	[expression too low]
phV36	Vocar.0018s0041	Vocar20000201m	Prochnik et al. 2010	18	341189	346978	+++	-	MIRNHFLALALVATVIAVADTATINNFPYVSCTKRPGAYSVASTVRMPDPNTFCFTIQATPPTGCTSRCCSADLRKILLDVTPECIVHNPNIRATLNGVATKVGPAFEPGVNGPNGTYALRLTQLGLNITTAAGAEVCISLGLNSQGAGCVTMQQLCKPPVGAAAGTCSIAIFDSQNDCCPISESGTYVAPPPPPPSLPPAVAVSDPCRTCVSLDLVDYGRSVFPGTFPPGLCQQLLDLVSSEVVAADIPLAGLQLTSCTDKLIQACGQFPSDEVGASYQDVLELLMHFWYGTLINTCKAYYRNDYSVTMRIDDGLPYSGCVTGFAFAACDPVSLNWPKCSCNTDRGSTPFYVSPFLNTMPGRTENTTLYCFQLAVREPAYPQGKCGKTTSVLKAEILA…	493	10	10	311.003	1317.06	814.032	4.23488	somatic cells
phV37	-	127212 (Volvox v1.0)	Prochnik et al. 2010	29	58740	68900	-	173 + 287	SVSATVNGVPTAVSPSFDRXQDGPPGSSILRVTQLGLNLTSNGAKICITLKPNSAGQGCTTLEQLCVPPNGMAPGSCIAAMFDYSLDCCPITRCQPTKVSVCGSFVSEEEARKLEPWAALQSPLWATNINWSSSAAQGGEICIELKNTTTLSQLCLGDRPNTAWISLFNKNRKCCPTYTAAV	181	0	0	0	0	0	-	[expression too low]
phV38	Vocar.0002s0430	55073 (Volvox v1.0)	Prochnik et al. 2010	2	3268309	3276191	+	-	MIQRISLLWLIATLTWRMTGVFAEIGSGENLYDYQTGDLLGFPYCRCERGQSAYSLAPTVVSKGGGQYCFKVIVKNCSANCCKVDLKKIEFNVNAACLVKSAIVRATVNGNLTAVGPNFYKPLDSPPGSAILRLTSLGLGLGSNGTEICLTLKAGVNSTGCDTLEELCIPPPGANPGVCQVAMFNNNNSTGACCPQSTPGLPKPQPPSPPQLSPKPSSPPPPASTTPPDHKTPPNAVPPQPLPGSLVPMAAPKPLSSNIPPSPSQQHTPTPEPHQKPPRMSPSPSPKPPATQPPPAFPLSPPPLSPSPSSPESPLAPSPSAPLLPSAFQQVQPPSSSLPFTPPPSSASPIYPPSSTTLPPSQLPVSHSPPPSQPLPPPPNTPLSPPSTPSTPPPLQSPS…	905	417	417	67.6444	30.5513	49.0978	0.451645	gonidia
phV39	-	100779 (Volvox v1.0)	Prochnik et al. 2010	29	41000	43100	-	211	MGLPPMVVNFTVDPTRCQPTKVSVCGSFVSQEEARKLEPWAALQSPFWLDSLVGQCNAVNSGLSFLLRSETDNCLKVITEKTDCKDTVNVTFPPCKCDNRKYATPFYVVPTPATQEPGRDPWTNLYCFKTKVAPKESVIAGPCNSSSTLHKAEIWADMSLRRQVRGFRLTPSGGTPRWASTSWGPSGANQLKATNINWSSSAAQGGEICIELKNTTTLSQLCLGDRPNTACVVLKTHAPCVARTTNINWSSSAAQGGEICIELKNTTTLSQLCLGDRPNNACVISLFNKNRKCCPTYTAAVS	302	0	0	0	0	0	-	[expression too low]
phV40	Vocar.0003s0020	106281 (Volvox v1.0)	Prochnik et al. 2010	3	266314	272203	++	100	MHYVAVVTLCLAAAFAAARAQILPADLIQSGLYPNFPFCNCNKGASPYSLSPTVTSYGNGTFCFTLNVRPVAGGTSYCATKADVRKIEFNVRQDCDIDGTIVKSTINGIYTVVGPSFSLAPQGPTGSMVLRLTQLGLGFDSDGAQICLTLISKAPGRGCTTLEQLCEPPSRAPPGVCSTALFDTNVDCCPISRLSIPSPPPPSPPPPSPPPPSPPPPSPPPPSPPPPSPRPPPPSPPPPRPPPPPPPSPPPPPPPSPPPPPPPSPPPPPPPRPPPPPPPSPPPPPPPSPPPPPPPSPPPPSPPPPRPPPPPPPAVFRIVFTPDDCTRIADRIVADVKAEAATYGSILIGEPVSTCNDRYIKVCFNFVSDPVAAQLQPFVSNQVSFWLNEALGAPACPAY…	576	117	117	1851.94	17963.8	9907.85	9.69995	somatic cells
phV41	Vocar.0027s0177	97824 (Volvox v1.0)	Prochnik et al. 2010	27	1644945	1654145	++	1030	MVREWEPGEPCRSLGAASDIQSMRGRSSNVARILATIVVATEAAATAPQQQPECCLAYYVLLCQTDLRQEVFERVKIFPDCNCERDVRASPYRAYFTGMVPYTGGSKFCFTFDIVPCQIDNPCCYMNFYKLEFPFMLGCRDSLQFIEYQGSNKSITWGPSYALANPPRIDLKITNMRLSQTNTRGQSICIGIADKCAELHSWCWPASGNCKLAIFNADPFDCCPVQPFTRIEPAYRASPPPPLVKHAPPPPPPPPPPPPPPPPPPPKKRAPRPPPTCSVCVRTYLSYVPPGGKFNFSQTACQDLHFFLVDELNAQADALDARMLVPFTPEPCTATEIRVCGSFFSAEDGQLMQDWMDSGALAEFNSFLLPPNDPCPSSLQGYYLTTEVTESSCLTGSSS…	864	37 + 59 + 38	134	378.77	25.529	202.149	0.0673998	gonidia
phV42	Vocar.0029s0031	90414 (Volvox v1.0)	Prochnik et al. 2010	29	320431	326473	+	-	MAPPLLLLASVLTIAWASAGTPAQAYVAAYPSDTNPDFPFFQCAGAQTSYGLVPDISDMGGGQYCFTLSATSCDDSCCNLPLTNIEFNVQARCVIDDAFVSATINGVPTAISPAFDIPQDGQPGSAVLRLAGLGLNLASNGAQICITLKPNLDGQGCTTLRELCALSSEGTEEGPCLVAMIGPTLECCSLTTIGRDQTPPPQSATPSQLITVQLPPPSYPAYPSIPPPPTPSTPLSPSSSIFHPSPSPPSRSPTPLPTPCSTCLVLRLDMDLPDTVFYIDDNVCSAVQEQIASNITAQIRSLGLLPMIANFTADPIRCEGQGISVCGTFFSASDAKKLEPWVRLQAPSWLGSLVGDCSPIFAGLSFRITTDSNKCLTVNAGLSCSEDEVAFPSHKCSKE…	553	45	45	7.62787	2.1477	4.88778	0.28156	[expression too low]
phV43	Vocar.0001s0294	-	von der Heyde and Hallmann 2020	1	2151796	2154844	+	-	MVHAAQRPHLPPVALHYGFLAIQSHPSHIPPLQSTCGKSNVLDKVIIWADDTSFYRSSIKSIALYAAGDTSAKYVVPNWNKFGSQQVKATKIGWTKDKANGGAICLELDQDVDLSDFCLWRFPQQKNSCMVSLFDTSYKCCPTYRPMALTT	151	0	0	593.828	13.8446	303.836	0.0233142	gonidia
phV44	Vocar.0001s0295	Vocar20008459m.g	von der Heyde and Hallmann 2020	1	2183501	2188794	+	-	MKNILLAALCVVAVFSASHALSSPLSPPPTRYQAFPYCAKCVALESIYRLKPDFSGLGNRTFCFTLEVNPLNADFMCKNAPIYKMDHYGRAQNLAAFPLRLSNVKALLSHEGAQLTFIVNSVPPTNPQMLLKKGCQRDVVIKASVNGIFTYSFLEVPRYASPGTVILKLNDLTARHLGTNSNGARICLTILNGGKGNCTTLRSLCADPKTTSFRKINNGNYRNTNSQECMVALFAGSDNANDRTCCSDPPLHPPSAPPPPPPPPPPPPPSPPPPPPPPPPPPPPSPPPPPPPPPPPPPPSPPPPPPPPPPPPPPSPPPPPPPPPPPPPPSPPPPPPPPPPPPPPPPLPPPPPPPPPPPPPPPLPPPPPPPPPPPPPPPPPPPPPPPPPPPPPRYCTEEK…	696	136	136	1559.21	34.6546	796.931	0.0222258	gonidia
phV45	Vocar.0001s0296	-	von der Heyde and Hallmann 2020	1	2190643	2193280	+	-	MPSTIGRTLTLMGINPGISRGRWSRLTSSAKPVYRIIVPSHDYPSSCTTLLSPPIPFPRSLSFLRSCNMTRNITPFAALPTMSGPFTGRKNTMLYCFNITLVKPIEPNSTCGKSNLLDKVIIWADDTIYRSSIKSIALYAAGDTSAKYVVPNWNKFGSQQVKATGIGWTKDKANGGAICLELDQDVDLSDFCLWRFPQQKNSCMVSLFDTSYKCCPTYRPMALTT	225	0	0	750.448	17.0875	383.768	0.0227698	gonidia
phV46	Vocar.0001s0297	Vocar20009310m.g	von der Heyde and Hallmann 2020	1	2194869	2197708	+	8000	PPSPPPPPPPLPPPPPPPPPPSPPPPPPPRYCTEEKVCVYLTFGFRESNATFPNGTCNNLADRIKSDLNSSASYILRPPVVPQITCTADFIKVCLNLDLYANATELHPVVGENAGRWLNYTLASTCAASRSKFNLTITVGGDGDWKNGNVSFRCFNASYANKCQGLDPPMNCNCNMTRNITPFAALPTMSGPFTGRKNTKLYCFNITVVKPIEPNSTCGKSNVLDKVIIWANDTTYRSSIKSIALYAAGDTSAKYVPPSWNKFGSQEVKATGIGWTKDKANGGAICLELDQNVNLSDFCIWRLPEQKNSCMVRLFR	316	29	29	340.305	5.61928	172.962	0.0165125	gonidia
phG, phV47	Vocar.0001s0298	Vocar20008985m.g	von der Heyde and Hallmann 2020	1	2225937	2230078	+++	-	MRTPMRNILLAALCVVAVFSASHALSSPLSPPPTRYQAFPYCAKCVALEPIYRLKPDFAGFGNRTFCFTLEVNPLNADFMCKNALIYKMDMLLNKGCGRDVNVKAFVNGVFTRSFTESPRSAANGTVILKLNDLTARHLGINSNGARICLTILNGGKGNCTTLRSLCADPKTTNFRKDNNGTYRNTNSQECMVALFAGIDSGSDRTCCDPGSPPSPTPPPPPPGNCTEEKVCVYLTFGFREPDVAFPNGTCNNLASQIQFDLLNSSASYILQPPVVPQITCTADFIKVCLNLDLHANATELHSVVGENAGPWLNYAHNSTCAASRSNYSLTITVGGDGDWSTGNVSFRCFNASTETKCQGPSKKSCNCNMARNITPFAALPTMSGPFTGRKNTKLYCFN…	526	11	11	10295.9	139.467	5217.68	0.0135459	gonidia
phV48	Vocar.0002s0417	Vocar20002745m.g	von der Heyde and Hallmann 2020	2	3178336	3174171	++	-	MRRRALLRGSYALLLLVGIAFGSAQLDTADDFGLGSFGLRRLSAYYPRNFGSQIPAACYQSSYFSPFRIYFRFLNYSDASQTTYVFQLDVSTCPVPTADCCRLWLDHMVVRTSPSSRVIGVRLDGLAKEYGVGPEGLTIYNMSVEPTVQRSLTLEITTPSEGYNNPVDLCPQGRYPDACDIISYDASETCCVERSALPYAMFFPAPPSPPGTVGPVLNAPPPKPLKLTPPSPPQTGPSFPPATPSPPPPPPDGFDLCCVDDVPQSPYVLTYLGSRPTGSDTAYLFQIMVRNVAIIDYDVDGPQYGDCAQMNLRDLGIAIYGDLMVKSVLFNGTVVDYTLQPQGTTRNASWLSIGLYRSLDSFRMDVLLDLVITVRGQVPSLCPANDILHSATACEWSMH…	579	8	8	1150.25	530.236	840.244	0.460974	gonidia
phV49	Vocar.0003s0019	-	von der Heyde and Hallmann 2020	3	258170	261328	+++	-	MPSLQQYKMAAKILAAVISASIAVVVSANQAAGVTSSFPFSNCSSAASAYSLAPSAKIYGTNNTFCFTLAAKQGSSGYCDTKADVYKIEINVKPTCDLGSVTVQSTLNGKPTAVSPAFSYPPGGPAGSVVLRLTQLGLGLNSTGSQICITLSGGQGCTTLEQLCQPPPELTAGGVCSAALFDSTGACCPVTNLPSSAIARPPSPSPLRPPPFKSPAPPPRSPSPRPPSPRPPAPRPPSPRPPAPRPPSPRPPSPRPPSPRPPSPRPPAPRPPSPRPPAPRPPSPRPPAPRPPAPRAPLTGPPSPPPSTNPVSGCKVCAFMTLYQDTAVNPNFRPMTMAECYAFGYMVINDISSQADYNSAILLDGGSTIACTDTQAKACVTFASNSDGEALRDFIEAMA…	449	146	146	2269.79	20662.2	11466	9.10313	somatic cells
phV50	Vocar.0003s0021	Vocar20012466m.g	von der Heyde and Hallmann 2020	3	288889	291448	+	-	MEILARSTCEKFSTTVKATLNGVPTKVGPWFDYPQTAPQGTVVLKLTDLGLGIDTKVSEDPPRYPPPSPPSPMPPSPPSPMPPSPPSPMPPSPPSPVPPCKVCAFITIQPTAPAPIPAGVCDTFVHTVYSTPFVAQREIRTLPGRTRGMKMYCFNITVREPLEQNSPCGDSNVLSKVEFWADDNLRRSIAAIGLKPSGATTMRFLSPSWGPVGDDILKVSPIRWTKAQADGGRICLELSRGTDLNSFCVAGNNTCWLFLFNESGKCCPLYRTTLP	275	39	39	78.7545	1.39626	40.0754	0.0177293	gonidia
phV51	Vocar.0003s0023	Vocar20013000m.g	von der Heyde and Hallmann 2020	3	297570	303150	+++	-	MMLGISSILCVVAAFAVARAQPPPLYKRFPFCKCPASPFIYSLDPDVESYGNGTFCFTLNVTPSFASGYCATAELHKLEININPSCDVRSTIVKSTLNGTPTKVGPAFSKPPGGPAGSVVLRLTQLGLGLNSTGTQICISLSSKKGAQGCTSLETLCQPPPGAPSGVCWTALFDSKLACCKVSSKPPAPPAFPPSPPPPPPPPPPPPPPPPSPAPPQMPPPPSPLLPSQPSAPPPPYPPSPEIPSLPPPPPPPPPPPSSPPSLFPPDLPPPCKVCTYVTFVPYETVGANFSFSTDHCYDIANRIIDDLSQYAEVAKLLPVEPEVTCRTDLVKVCIYFASDAEGAKLSPYIDAQANAWLDYAFGFACPTNLTGHQLVVEVGGDSDSWPGIPETCLNARAA…	567	86	86	13981.7	255.277	7118.49	0.0182579	gonidia
phV52	Vocar.0003s0024	-	von der Heyde and Hallmann 2020	3	305358	311084	+	-	MTRLGLFTVLCLVAVFATADAVQTGEDKTFPFCKCEADSSIYSLTPAKDVGKGKFCFTLLVDPTKASGYCKTAKLYKMEILARSTCEKFSTTIKATLNGVPTKVGPWFDYPQTAPQGTVVLKLTDLGLGIDSNNTQICISLSGKNGCNTREKLCQPRNNDTVPGECWTALFDKNLACCKVSEDPPRYPPPSPPSPMPPSPPSPMPPSPPSPMPPLPPSPMPPLPPSPMPPSPPSPMPPSPPSPMPPSPPSPMPPSPPSPMPPSPPSPMPPSPPSPMPPSPPSPMPPSPPSPMPPSPPSPMPPSPPSPMPPSPPSPMPPSPPSPMPPSPPSPMPPSPPSPMPPSPPSPMPPSPPSPMPPSPPSPVPPCKVCAFITIQPTAPAPIPAGVCDTFVHTVLGTI…	655	183	183	580.432	23.8539	302.143	0.0410968	gonidia
phV53	Vocar.0003s0025	Vocar20012723m.g	von der Heyde and Hallmann 2020	3	330185	332910	++	-	MISVLHGLVLVAAAFAAANAQDLVSMKYKVFPFCNCPPSGFPYSLSPPKDYGNGKYCFTLLVDTSSSTEACARAGLYKIEFNVNPACDKWSLDIKATINGNFSLQKPDFHFPASPPAPPGTQVLFINNLGLNTSSNGAEICLFLKSSKGRKGCTILNEFCLPPPNGAPGVCQTALFDKSIQCCKAPPRLPPTPPSPLPPSPPTPPSPKPPLLPFINVIPVDKCRTWANVTLDELYKQADAYGATVISPRFPEPYCDGSLVKVCLTFASDADGVKLQPYVQAMAESWTQMIRDYLGCPFGNRTYRIEAAIRGDGSLPYVPETCLYADDIKDCDVPNPPFPPCNCTSTRGATPFTVQSSYTVLPGTKKDRVLYCFDTALVQPNDPNSRCGSSDTLAKIEFW…	496	25	25	13842.4	182.022	7012.23	0.0131496	gonidia
phV54	Vocar.0003s0026	Vocar20012729m.g	von der Heyde and Hallmann 2020	3	336564	339789	++	-	MRSDWKLLLLMAAAFAAANAQDLVSMKYKVFPFCNCPPSGFPYSLSPPKDYGNGKYCFTLLVDTSSSTEACARAGLYKIEFNVNPACDKWSLDIKATINGNFSLQKPDFHFPASPPAPPGTQVLFINNLGLNTSSNGAEICLFLKNSKGRQGCTTLNEFCLPPPNGAPGVCQTALFDKSIQCCKAPPRLPPTPPSPLPPSPPTPPSPKPPSPPTPPSPKPPSPPTPPSPKPPSPPTPPSPKPPSPPTPPYPSPPSPPTPPSPKPPSPPTPPYPSPPSPPTPPSPLPPSPPTPPSPLPPSPPTPPSPLPPSPPTPPSPLPPSPPTPPSPLPPSPPTPPSPKPPSPPTPPYPSPPSPPTPPSPKPPSPPAPPSPKPPSPPTPPSPLPPSPPTPPSPLPPTP…	705	221	221	27323.7	454.214	13889	0.0166234	gonidia
phV55	Vocar.0004s0106	-	von der Heyde and Hallmann 2020	4	851046	858205	+	-	MIRSTSFATASWLPVALFLIIGACSQGQAQPLTAAELAAIRQAESTFPYHACSLVKTGAYSFYEGVASFGNNTFCVKIMAHSCSEACCDADLNKTELDVNPACNVTPTADIRATINGVPTNIAPAIRSAENVPGVNVLRISRLGLNLSTAADAVLCITLKPNRLGRGCTSLEDLCVRPDGYPSGTCRAAFFNTQRNCCPIDVFPSPPTTTPSPPPLSPSPPSNPLLPSPPPSPSPPPPPSPPPSPPPPPSPPSPPSPPSPRPPPLPRRPPRPPRLPPTRPLAPPPSPPPSPPPPSPPPPSPPPPSPPPPSAPPPPPPPPPPPPSPPPPSPPPPSPPPPPPPSQPSQPSQSPKPPAPADPEDITRETPPPPLSPPPVTPFDCPVCLTVQLIPPAVNLYPY…	680	146	146	14.7565	12.3623	13.5594	0.83775	similar in both
phV56	Vocar.0004s0253	Vocar20010725m.g	von der Heyde and Hallmann 2020	4	2018925	2023516	+++	100	MKPSAITALLLVAAFAAANAEQTGLYPSFPYCKCVKKARYSLSPTVKALGGGKYCFTLNSVTPANCNTYCCATADLKKLEFDVKPACDVFGVNVRATVNGVYTKVAPSFDYAADGPIGSTILRVTQLGLGPADDGAEICIILQASKTGEGCTTLEDMCVAPAGDAPGVCAVAAFDSSNECCPISKAVSPSAGRFTFSQNDCSAYGSDIGADLNDGANSLGIALISPFELAECAATYFKVCGTFFSEAEGASLQPYIDDTLAFFLTYVVGEGPSCPAGLYGYEVTAAIGGDGSIAAVPRGCLNGVQTRTCFFPPPPPSPPPPSPPPPSPPPPCNTRQGATPFAAKYLLTKARGRSSSTVLYCFNTTVVAPLNPDSACGSTTTLLKAEFWADDAQRRAVAG…	485	20	20	5970.02	35816	20893	5.9993	somatic cells
phV57	Vocar.0004s0368	Vocar20010528m.g	von der Heyde and Hallmann 2020	4	3084864	3088138	++	100	MAADGPRLRKGFITFGVAVLIAAASISGVSSNPEEHSLAHRRRRGLQDAFSDIQAIVADDNTIYSDSAYVQRIAGAEATRFPFCKCKTYACECSPYTVSLSSVTKVTNPAATKYCFKAKYNGCPTPVQPCCQALSLNVEKIAFTTTSKCAKRNVSRVDVRGRMWSSWETKSWPQVTTGSDYELRIYQLRFNKTQMDGAEFCVYTQGTCTDLRELCDVNGNNCQFSISEAANTAYCPVCPVSGPPPPPPPPTPSPPPPVTPFTEPCQWCATIRGTDVSSPVAFSKSVCEYVTSRMRANITAGFAAVGATVTFNGTTCDNTQTSFSVCGSSSPKEAVMSQVLADSFIYEWLLNIAQQPSGVCPPGTLQTSVTATVTASFGTCFAGSNNYGVNCAFGQPPPP…	418	16	16	13.4127	443.934	228.673	33.098	somatic cells
phV58	Vocar.0004s0371	-	von der Heyde and Hallmann 2020	4	3122587	3137635	++	1577 + 100	MCRTSSEAPSYLLHTSSSPISTAQVGSANRYCLNITDAGCDPSLPCCQALTQRVDQITLSVGSSCVKPAVRQVEILGTVWSSWETRTWTVTTGWTTSSVYTLRVYDLPLDASAALPGTSLCITAASPCRSLAQLCDVDGGDCYCLSPLTNLPPPSVLPPPPTSPPPPSPPPPSPPPSPPPSPPPSPPPSPLRTTTSTHICQQSTATVPYLLSPLAQSNGQDQQGFPAVVMCISVQGQTCRKKSPCCDMDFSKVEILLNKTCSPEIRKINFDSQDMLYSWDTYDNTPELVSLKFTNLDQRLNGQSPVGKSLCWWVRPGRCANPEALCYQGKCQANIFSNDNKCCPATYVS	349	39	39	288.952	1197.65	743.302	4.14481	somatic cells
phV59	Vocar.0004s0372	Vocar20010517m	von der Heyde and Hallmann 2020	4	3147271	3153816	+++	-	MAHLHMARLVWYSVFRVTIFHLICSAFASEERVISVHTGSSSRLLQGATTRGQIDFPYCRCETYSCRCSPYGITYLGASEVTTAAAAAGTKHCFAVGYVGCAAANNTCCEALNRNVYKMSIAIGAGCTKPVMSSVEVNSRKWLSWTTSATERGTDANGTVVFGYDVRIYNMQFNMTTFPGSTVCITTTEPCSGIQQLCDSTAGTCKVAFFDTHDASRYCPVCPVSMLQPPPSPLSPQVPLAPEQPSLPQPPSPAPLSPFPSPPHPPGPQPICSVCVVITITPPLNLTAPLYTFSSPINCSQTSSLIISSFSAALVASGVRIREPLALWKCSGNYNASRSPPTLPQLFVCGAFDMPADTPAMENVISELTSRWVASVMGTPAVPGMGNTAECPVGLEGYN…	594	42	42	1705.71	255.134	980.422	0.149577	gonidia
phV60	Vocar.0004s0374	Vocar20010623m.g	von der Heyde and Hallmann 2020	4	3158380	3164279	+++	-	MCSLKAAHTSNCRRLTLLSLSVFLLAEYKHIVSARIISLRGGQELRTSLTGLTTSDCGCSPYSLGFASFEKRFLGGGQRDSRYCFLVGVRGCDPGDTCCETLLRGGVDSLYLQTSGVTAVHSRGHKHVEMGVRQVEVNGSIWMRWDAAPQRTDGGTLPAGMDDIDAATIRIFGLSLDSSTFSGTTICLTTTSVADMEQGSLVGEQLLCEAPGDCRFAVTPAAAAGGAKDAEKDAAVCSVLGFRRRARLLASVPAATTASRTASQPPAKRPVSSPRLRPPSPRRMPSPPISKPSPPSPQVSSPPPPSPSPSPLSQPPSPSLGSKTSDAAMISYSQVCAAINLISPRDQSGALTYTFGKQVSCDGAAEWMAKNLTDAAQQAGAQISTPFALESCSATYDPN…	485	10	10	2043.38	7910.6	4976.99	3.87133	somatic cells
phV61	Vocar.0004s0376	-	von der Heyde and Hallmann 2020	4	3169158	3173652	+	100	MRSVRPPLLATLCSLALTVLVYTVGAALAQSRPSGVATPEALRLARLKALQAAIARKGAVKAPFARFPYCRCDSYDCSCNPYSISYVGSFPAVSRRPGLRASKHCFQVRHIGCAAGTPCCRVLRNKVYKIALPVNCNCVTLPLALIEINDEGSAQIEYQGLAAAVCCEFRIAGPYLIVCELMSNELQHGNDACVKVGILAPC	202	0	0	3.92812	8.16262	6.04537	2.07799	[expression too low]
phV62	Vocar.0007s0316	Vocar20006629m.g	von der Heyde and Hallmann 2020	7	2562224	2570230	++	-	MVSREPVRRSSGSRDAADLRFLPRSCWANLGRWNFLLIFLAVFAITSCLAGPLAGTSFPFESCEKTVGTSRISVSLKNTSWSATRGETRVCFQFSVSAPELCDAGPRRCCNTGFHKFKFYPDPMCKQAVNSVTYQVKGGPVVGPISSVYYERSGDTFIGKITMLPFTINTTDGAVLCWTLRSPCSTLRDLAHPKTRDLNLLEVALYDYKVDGYECCPLGAISTYGTDAPPSPPSSPPLPPRRPPNPPPSPRASPPPPRSPPPRIPPSPRFPPPVRSPPPVQMPPSPPPLQRPPPPQVIRPHAMRTRLTRLTRTPGVSPRRTHASQPAVRFYQDSRVFGIFLLPGISFDDARARCGRGGGFLVSLVSSSEWNEVRAALAELSSYSGFGNSLSVWVGVDPA…	639	45	45	4471.12	157.481	2314.3	0.0352218	gonidia
phV63	Vocar.0007s0317	-	von der Heyde and Hallmann 2020	7	2573754	2587564	+++	100	MDSRKESGRTGGSGHATQLRVPRSYLAHQRGWTRLLSLLAAFAFTGCLAGPLAGTNFPFEPCIKTVGMSRLTVSLKNTSWISRTGGTRVCFVFSALPAADCYPGGYRCCNTGFNKFKFYADPACRRAITDIAYQTNVGRVISVSSVYFEDDGDADTFIGKITTLPFTLSNIDGGVLCWTLVEPCPTLAQFTHPATRDLNLFEIALYDKKVDNYECCPLGAISTYGTDAPPSPPSPPPLPPRKPSRPPPSPRPSPPPPRSPPPRIPPSPRFPPPVRPPPPVRMPPSARPPQPSPPPFPRPSPPPSALLRSPQPPSPLPPRPPPPSPAPPSPPPPSPPPPSPPPPSPATSKSATANFPPPQLLQPSLSPPNAPPSSPPSSPAAPSPPPPSPSPPSPPPPSP…	791	222	222	686.038	2389.39	1537.72	3.48288	somatic cells
phV64	Vocar.0008s0161	-	von der Heyde and Hallmann 2020	8	1413441	1417467	++	-	MGRTPLQLLKCSVAQLLLAAALAWTVSADTDADPELGVAATLPGAADVEALNKFPFCQCQDYRCSSAPYRLKSIPSPTKRSDELCYLIERVGCSQANPCCKILLDRLGKVEFAVNKTCKVDYVAAFVNGARFNSLFDTNFPDGKIRITPLAMNVTTATNTSLCLRFKPGSACASYSSLCNTADGACTYAVFESSAHQCCPICSQSLPPPPPGMPPPTPPTLPAVPSGPSQPPPPPPPPPPPPPPSPPPPPPPPPPPPPPPPPPSPPPPPPPPPPPPPPPPPPPSPPPPPPPPPPPPPPPPPPSPPPPPPPPPPPPPPPPRPPPPSPPPPPPPPPPPPPPFPDAVRAEVQKCDCISSLITTTSRFRLDYVRSIPTPNQVIYHFNLYVVSPEDCWEPGYRY…	721	135	135	276.199	100.877	188.538	0.365234	gonidia
phV65	Vocar.0009s0095	-	von der Heyde and Hallmann 2020	9	868830	877399	+	-	MPSPPPPPPPPRSLPPPQSPAPSSFLPPTNMPSPPPPASQLPSSPPPPAIQPSSPPPPHPFSHPPPSPSPFQLPSPTPSMLPPSPPVPAPPVSKPPSPPLPTASRPPSPGPSPSSPSPPPPSQSPATLPPPLQQPPAKSPRSPRSPRIPKAPKPVSPPPPSPGGNSILANDFPFLDCKGSTTTSPYRMSSLSGPFNVTSLTATYCFTAAVSSSPVPGSSCTSTTIDKIAFILDISCVSDDAKRLQSTTINGEVVTFNYRTKKWKGEQFGLLIFDKLDNTFPVTPATGLRLCMVLQTGGSCSTPAGMCQGGASSGSCVYLLSDAVYSCCAVSEALL	335	161	161	142.827	35.7298	89.2783	0.250162	gonidia
phV66	Vocar.0009s0096	-	von der Heyde and Hallmann 2020	9	893687	896323	+	-	MAGVPASATVASSRRHPNTGSISASEPGSDRLSQQPNGPKDSPGAITIPSSSPSVRSLRWSNGIGQNTAFLWLLLLTTTVGIAAVADTPPPPPPVTLPCSNSILRILYQGAEITSAADVPVPFRASDTGSIRINQSVISMMDYAVDGGSWYSGQLADLYFNNTDSSNVVSYFRALPNLEFQRRFNGTPGCSPLSMDEMNNPTFSISYPLSPGIRLGFAIYSALLRAAQSGGDISDFQYCALYPFYLFGLLRTANASFAPIDGTPEIWLSGKWVTAGDPSDSVCPNSPTSWGYVPLEFYFCPCPSPPPPPSPPSPSPPSPSPPSPPSPPQPPSPPSLPPPSPPPPSPPSPPPPSPPSPPPPSPPSPPPPPSPPSPPPPSPPSPTPPSPPSPTPPPSPPSP…	588	216	216	0.257769	1.18132	0.719545	4.58286	[expression too low]
phV67	Vocar.0009s0102	Vocar20005015m.g	von der Heyde and Hallmann 2020	9	993374	1000776	+++	-	MAFKVVQLGLLSVLVGVAVTGVQVAASGNSFPFSQCESSALKSPYRVKYDGFLIDYDNQDWTCFRMYLDTDAATDCPAKATDTPDCCSPSLAKIEFNAAPSCEGYVTKALMFKGYDDSANGVVEKIFPVGIEVLTPDVSAVIRISKGLNLDQSVLAKYPEGLPFCLNRKPDVCSEAQTYMYEGTAVYQYAIFDASSECCPTGSTTSISPILNLAPTEQARKVPRRPTSPPPPLPPPPPPPPPPPPPPPPSPKPPSPPPPPPPPPGSFPFCECKSFAPTDYPWRAVFHNVTEGKGGQRVCMKLYVDEAAAATCNNAVGCCTQRLQKVEILANRQCRGSISQFTMTGVTGTKSSFLWHNTFPTLKFTNLNLPYKVGEDGAFLCFSIKGPSCTNLQQLCSEG…	424	42	42	3418.79	67756	35587.4	19.8187	somatic cells
phV68	Vocar.0009s0117	-	von der Heyde and Hallmann 2020	9	1139993	1151476	+	-	MPSSPPPASQLPSSPPPPHLFSPPPPSPFQLPSPTPSILPPSPPVPEPPVSKPPSPPLPTASRPPSPGPFPSSLSPPPPSQSPATLPPPPQQPPPKPPKSPKSPKSPTSPRTPKAPKPVSPPPPSPGGNSILANDFPFLDCKGSTATSPYRMSSLSGPFNVTSFTATYCFTAALSSSPVPDSSCSSTTVDKIAFILDISCVSEDAKRLQSSTINGEVVTFNYRTKKWKGEQFGLLIFEKLGNTFPVTPATGLRLCMVLQTGGSCSTPAGMCQGGASSGSCVYLLSDAVYSCCAVSEALL	299	125	125	31.5113	95.8953	63.7033	3.04321	somatic cells
phV69	Vocar.0009s0132	-	von der Heyde and Hallmann 2020	9	1293663	1296916	+	-	MCFTVGGQSCDPRYPCCHMDFAKVEIPITWACKPAVQEIRVAGKKISYSWSFYEEFVTLKFTGLLKYLPQPVGAQICWGVAPGACADPAKFCLYGRCQVNIYSVDNKCCPATFVS	115	0	0	104.128	6.83197	55.4802	0.065611	gonidia
phV70	Vocar.0009s0136	-	von der Heyde and Hallmann 2020	9	1402394	1415004	+	8205	MGTGLALVLVLSFAVAFYGAASANDEHSATPINHPGRGLLATTSPGFPWCKCETYDCTCNPYTLIPLQPNKRLGFVRTCFRVAYIGCDPNLACCRGLTDSVQKFSLDTNPQCANTANIYGITVNGQMYDSWDTHVHDTGYELKIYNLQASNATFPGSTICVLGYPACSTWADLCRGYPARGCRYSIVDTSESNYCPICRLNPPTSPPTLPPSPQPPSPSPPSPQPPSPSPPSPQPPSPSPPSPQPPSSSPPSPQPPSPSPPSPQPPSPSPPSPQPPSPSPPSPQPPSPSPPSPQPPSPSPPSPQPPSPSPPSPQPPSPSPPSPIAVPPSPPIAVPPRSPKPPQPPPSECAICIFINIYPKPNSSDSNIFTFGNGASCSELGDLIIADTTSNAAAVNVTI…	749	145 + 60	205	24.2988	8.89644	16.5976	0.366126	gonidia
phV71	Vocar.0009s0299	-	von der Heyde and Hallmann 2020	9	2914948	2929313	+	5861	MRPVTASGGCSSSGFVPCPGPGLALGPGRGRRHAHGVLHGTRAPKLLLRRRLPLLALFVCVALHGALPWPTLPGACAERSDRTPRHRTLQSSEDRSDAAAANSGTAFAAGARQMEKRAVGTVRLHRSLLQKPDDEGDIFPFQDVCSRTCQESPWRIVGVSRSMKGRAIIVYCLKLQNRGNCTASPCCSSLGMGVDALTISMAATGKCNVTSIARVTAGGDTLSRYDNYPMQYTYGDAVDVGLMVTDLASLGRPVEGLEVCYEARPTCTQWSDICRSGVPGSSSGCRFSVSEGNGEGWYSCCNSCPAGTLTFQNIASTDFPPPPPPSPPPPPRPPPPMRSPPPTRLPPAPPPNRNSPPLFKPPPPRPVPVIPSTPPPEQPAVNYPNMEPQLGDMPNSPTS…	821	369	369	66.1302	103.316	84.7231	1.56231	similar in both
phV72	Vocar.0012s0191	Vocar20006064m.g	von der Heyde and Hallmann 2020	12	1835801	1839551	++	-	MEACSRTLQRAMSWPTHPWPRGLALLLIAFTLAAQVSRAASLERVSRRVLQAGQQKPEETRKSLAWLGSQFTFKSKSSCDPTFYHSPLVLNITRPDRSSFCFKVSNKMPEVVKYSCQQAPNANQVSRIQLVIASGCADAIDAVTVDGQPWSSVTYDNASSVLSIERITTLPPADAANPADRTVCVQLKSDHPTCGAASSLCAPSYGPEPACAVLVADSKATCCPVNRVSYADAVIEESPLYRLYGKFNDPEGCETITSEAALLAALGKQYRAALELPSGSIQFLSYNCRNNRLAAVFKVSGLKLDQSETINERSAALLKPLAQALGIVGVRANFYTFPPPSPPLTPRRPPVRSQPPPTLPQRPPTAPPSPTEQTSPAPTYATQSSPQLPVYGSR	394	33	33	102.672	59.0803	80.8759	0.57543	similar in both
phV73	Vocar.0012s0256	Vocar20006093m.g	von der Heyde and Hallmann 2020	12	2441709	2447890	+++	-	MPRPVPYDMGCVQEVRAVLLLVLSIAVLLSFTTCWAVTLTPTTNCSIDARTNRFSIAPNVSLTELFTYCIKIQSNSCSVTGNACCKNTTTSSLLIDVDENCMYETFTATLNGKAVKGVTIGPPSKGFGTRAVLTIPGLKLDAKALGANGATVCITLPKASACGSVDRLIPGGISNAAAWNATLLSSDLRCCPVTSLRQPPPVPCETCWVWDVIPGKKTSGTSYDFLSRNSCPLASLEPEYMTEDWKNCCEFEGYFYKLNYLDDLLAKGLATGFGKAVCNATSLRLCGNFTSMAAAQGLASERAMMGGLPFDFDNTDDTCPMGLIGSTVRLRSVQPTTGALDTRCAPVNEVIQDLCWLPSLKDDMSEGMVPFPNSTCNSAPGVTPFAMSMFYEVSYFNRT…	531	4	4	2066.51	10719.8	6393.13	5.18736	somatic cells
phV74	Vocar.0016s0049	Vocar20000791m.g	von der Heyde and Hallmann 2020	16	371485	375129	++	-	MTARTRKTIQTTMLRKQVPSCNSLPQPSAPSSAPQLRCSYPQLIPFLAAATVPRLVPLLVILLLARISGITAQPPPPSSVPTCGPGDILYYNGVAVSMINATFREDQTGAAVGWSQFLTQVPTSCDDDLGAANGSVNVAARMGSFAQSQPAAYILTEAEFSARYNGTSGCSDPDFLVDFPALFSANITGCLSLDYGLGLLSSLLTQQGHVPCQPMTFYIFARLLDTATLFSTPKRYGWLATDWVSAGNASDPVCPNSPKSWGYVKLGVDRCPCPSPPPPQPPSPVPPSPSPPRPPSPSPPPPPPPPPRLSPSPPLPPSPPPPLPPPSPAPQPPPSAPKSPRAPKPPKVPKAPQPPPRPANNLLVNKFPFSSCSASDVSLTPYRMTSPMGPFNVTATAAT…	527	87	87	251.31	4218.05	2234.68	16.7842	somatic cells
phV75	Vocar.0017s0136	-	von der Heyde and Hallmann 2020	17	1512268	1520996	+	100	MRVLLLGAALLALGAVSHGQPLIHATSSLAGFPYATCQRSLSSSVYSTLPVTTRPSPNVYCWRIKADEAQCTVRSPCCNTSIAKFEFDVDPVCDVRNARFTATLNGVPTATVGIYTPPNAANKVKRRTLRVPGLNLTASNADGAELCLRIVSGVCKTLQQLSAGNIWAVALWNPEHRCCPVSKGISPSPPPPPMFPPPSPPPHSPPPPSPPPPSPPPPSPPPPSPPPPSPPPPSPPPPSPPPPFPPPPSPPPSCGACIDITIMPPSEFPDPLYTFTSERCAQLATVITTDVNEVANFLGARISYPFELAECSPGFDPQQSQYPKFSVCGEFVSADDGMLLTDFLASPFSFDKWIAFLSGGESCSSETAGYTFIAEATPLNGCLQVSILEMGTMGEILTM…	442	67	67	148.196	132.971	140.583	0.897267	similar in both
phV76	Vocar.0017s0137	Vocar20000523m.g	von der Heyde and Hallmann 2020	17	1524512	1528618	++	-	MASKLWHHHHPILNTLMLTNIKLIERPTTTTTTVTPRPTNRQTSLPKPVSKTPHTTKHPSPPPFCFQWTRVDGPVGPTQCAQLIKAANTVLADVSLGAPPAVPLRCERANASIAVACAALQTNADVALWARALDNSGLSNIAGLVNISSIRVPEGGALVCKQSQLEYFVTSDRLEAICESGFTNAPCPFIPQDLFPYCQCEPRALGKTPYTVTYSRKYYSFSSTWYCFKITANQSSCSANRCCDMDLGKIEWLTGPNNAGCWTSVTGWFLSSDKPGTRREPAWSRFVDKRAVPGRNTTMGVLKTTNLNINLRTIRPNLEMCIGLRRGTRCSNLQTFCYLGTCKYAVYDKSAGCCARDYASGDLYGGYKRLL	371	4	4	2235.97	2721.24	2478.61	1.21703	similar in both
phV77	Vocar.0019s0064	-	von der Heyde and Hallmann 2020	19	556271	563049	++	-	MGQPMREWLWLAALGLTFLMQTSHASYLTGSKFPWEGCKMGASINRWTVTLTSYVEDPTRFSRACFRFGYKPVSQCTPNGLRCCGENHINKFKMYIDPLCQRSDIFNITVNNMVTTAAFKEYLHGDLDKPTFKITNMYIPFDKINTTTLCFSMKGNCPTLSSLANPDTRDQGVLEVGVYDKKVDNYECCPMFVFPVTGRTDVPPPPPARAGPPPPEMPTLPPDAPEPVEFPSPPSPPPPVPSSLRPPPPVVRSPPPAARSPPPQQPPSPPPPRPPPPSPPPPSPRPPPPSPPPPSPPPPSPPPPSPPPPSPPPPSPRPPPPSPPPPSPPSPPPPSLPSPPPRSPRPLSPPPRSPPSPPPPSPPPPSPLPPAPPPPSPPPPSPPPPSPTPPSPPPPSPSP…	707	348	348	546.859	9037.58	4792.22	16.5264	somatic cells
phV78	Vocar.0021s0055	-	von der Heyde and Hallmann 2020	21	881346	885660	+	1548	MRHTKLLLLALFVAAATPAFAKRELLQAYLEMFPPYGCTRDPDQSRFRVDPAYTVNGNKVCFTARVVPCARPGSACCKPDVDFNKLEFFVGTTCKGSIDRVTVDGERAQMPTFELYGAKQNKALYKMTNLNLTTRTAEGKQICINLGGPCPTMQDLCPQGDGTCSYSVVESGTCDCCPVGLLGAFSPPPSPPPPPPPSPPPPPPPSPPPPPPPSPPPPPPPSPPPPPPPSPPPPPPPSPPPPPPPRPPPPPPPRPPPPPPPSPPPPPPPSPPPPPPPSPPPPPPPSPPPPSPPPPSPPPSPPPPVPPSPRPPNPPPPSPPPPSPPPPSPPPPSPRPPGPLPPSPLPPSPLPPSPPPPAAPCSDPSSRCCNQNLSKIEWWTKDSCRGSVRAAYLDGVKVD…	477	171	171	2.38421	1.97667	2.18044	0.829066	[expression too low]
phV79	Vocar.0022s0224	-	von der Heyde and Hallmann 2020	22	1990278	1996110	++	-	MQRHGGLSGVKAVAAFHTTGSSSGCRSKAIMRSASRLTLAAWALPLLLMLALGGVQLAAGQAPPPPPSLPPPPSPPPPSPPPPSPPPPSPPPPSPPPPNPPPPSPPPPPSPAPPSPEPLPPSPPSPPSPPAPPPLPPTPSPPPPPPPPAGSPSPPLPQPPSPPPSPPPSPPPSPSPPPPSPPPPPAVPPPPSPPPPPPPSPSPPSTPSPPPPSPPPPSLPPPPPPSPPPPSPPPPSPSPPPPSPSPPPPSPPPLPPRPPPPPPPKPSTPKAPKNPKAPKAPKAPKLAPPPPPENTILVNKFPFSTCSARDVNLTPYRVTPPTGPINSTATQATYCFKVAATGAVSSINPCARMKINKIEFIVDLACVYETPKALRSANINGVPVYPYYNEKTWRNTTYG…	461	230	230	373.139	312.503	342.821	0.837498	similar in both
phV80	Vocar.0024s0152	Vocar20001388m.g	von der Heyde and Hallmann 2020	24	1126287	1131775	+++	-	MKTVIALTLLSLATAFGQDLGLRAAQTNQFREFPYCQCQKYPAAYTLSPFIRKGTTNTYCTTVKVLLPTNCTDYCCLKADAKKLEIDAKAACNAPGVVLSATLNGVPTAIAPNFELAPQGFPGSTVLKLTQLGLNLTTADGAEICITLGTNRAGKGCTNLEQLCVPPPGAPAGACSAALFSSNNDCCPSLPPPPPPPPPPPPITPGFRTCDTCVTFSLVAGPTAVFPYSFTPAQCDAYAKYVSAAFLKTASAANASIFKNFTLNTCTGNNVTICGKFRDANGALVAPYADALVAEFLNLVVPGGVAPPYLIGHTVTVTIASLEGTATSRRRSLLQTSTMICPDATTSVALTPPPVDFPKCICEFKQGTTPFAAFPFYTTKPGSKPLRTQYCFTFAVISP…	516	18	18	2120.11	43788.9	22954.5	20.6541	somatic cells
phV81	Vocar.0024s0216	Vocar20001310m.g	von der Heyde and Hallmann 2020	24	1596034	1601391	+++	-	MRWEVAFLVAVATLATIAKAQAEAPQSSLALTFPYSECKKAPSAYRLEQFVSSKANNTYCFAIRVDRPANCSDACCSSKLIVKKLVVNVKPECDVPGVLLAATLNGKPTSILPTFDKGREAGVTLLRLTHLDLSLDAANGAEICITLNTNRAKKGCINLEQLCVPPPNEIRPGVCMAAVYDASLGCCPVQEVRLPPPPPPSPPPPSPPPPLPPFSLCNTYVSFGISPTTDFTVPYSFTQTQCSAVTTIVAEAMASAAAMFGDNITSDFTLMSCSGGNITFCGTLVHTSNPTIPPSAFNTEAAALLSKLLSAALIPHGCPPYLYNHIIHAELTANLPGIGLTRLAEATETCTELMYAMHMGALRFPNSSRCDARQGSAPFAAGYLYSSRPGLGRRSNRTT…	529	19	19	42.6921	932.874	487.783	21.8512	somatic cells
phV82	Vocar.0026s0098	Vocar20015274m.g	von der Heyde and Hallmann 2020	26	1117390	1119819	+++	-	MARSGASPGAVLMLALVAGMAVFVRASYLTGTMFPYENCVQNTKYSRFSASFSSYSVDTIRNTSTFCIRLHVGPTCVSGPYRCCNPTAYINKIKLSPSLGCRGSVGSVNVLTPSGKNYSVSSIYFERHMGQDVMKVTPLMQWLKSPDAIRDVRVCFNLKRPCWNLNMFSYNTRKIEYSLYDKKVDDYECCPVGVIGLPQPPSPPPRPSRPFGVSDPPMPMEPPTLPSAPSPPNEPNPPAEPRMPRPPSPLPPGPRKPPSPRPPPPPRPLPPSPRPPPPRRSPPSPRPSPPPRPKSPPSPPSPPSPPSPPPSPPSPPPSPPSLPPNSPALPLPPNRPPPNQPLLPSHPPPPNHPPPSQVVPFDDDPYSSQGDDNSGGLNHDAAPPPTFPDGPDAPVAPMD…	403	158	158	3290.08	22829.8	13059.9	6.93898	somatic cells
phV83	Vocar.0026s0099	Vocar20015297m.g	von der Heyde and Hallmann 2020	26	1125392	1129134	+	100	MPCPVPAGHVSPFSNDWETLVSGECRTTEWPQIQHGGIPTSAACGGGSGGQYSMQWHHHHHLQHNYSTTTTTATTTTTTTRTNTCTSTKQQPLLLRLPHFQQQSRVCKASYQGSDKAAETLTHRNAAAAMAAVSTKCNAEAGDIRDREALGSHSQPAATQSYRQQKTQELQTHVQTQLPRDHATAGTTGTARSQDSSYCTASQSSCESQYVACVNQAPAVKAEMHGAAGRGSAAADKPTRSRRQQQPRSQPSLSRVAAAAVLPALLVLLALGGPAAPRLVYGSVYTGTDFPFENCVQEQRNSPYYATLYSYRENRLYNTSTICIQVRVLSTCTPGKYRCCTTGINKLKVFPALKCRGSVASALVNGNLIMSYYWEEHSGYDILKVTPLSQWLSTPEKAD…	778	103	103	8.44198	3.03882	5.7404	0.359965	[expression too low]
phV84	Vocar.0027s0017	Vocar20014700m.g	von der Heyde and Hallmann 2020	27	139594	146217	+++	-	MARPELPNVATLPLLLLAVWLMAGGAIAGDTACSKVCLAFEFMAPPTPAYAYPPLSFFYGSNDNICYDAIGNITAYLDQPLFKAADSGLISQMVSGFAGGDRSCGPNSIKWCATFASQSDAVTMQETVRRGAEQILNNFFCPAVPGGYGFRARISTSTSTSTSSSGGNCLPQLDVSAVCQPLRPPFPSCECNKKRNVTPLRLVSFPVIEPGRTSKTTLYCFRIGSSRPSVPPNPCTSTYLLKAEIWADDTKRRAVRGTRTTKYRGDPVWGSPSWMAFGENTLKITPLNWTMSEAVGGEICIEISNELQQLSDLCIGGSCYVSLFNEDKSCCPTYPVATAPSPPPPDYYTTFP	352	7	7	364.573	3111.2	1737.89	8.53383	somatic cells
phV85	Vocar.0027s0163	Vocar20014546m.g	von der Heyde and Hallmann 2020	27	1535364	1539082	+	-	MAVVVVNSATASLLAVCLVFMAVGLCTGQIVDVKFPSCRCERELTPFAIKSAATQLTSRNPGVVNLYCFEIGIVNSGSGACYTEPASQNLSKVSVYAQAAQRDRLSAFGVLLAARRRRMELFKPTTINEFCEREGASGSFCWVALFNDNNCVPPNSTVVISKRLCCPRFQSFLSP	175	0	0	0	4.67341	2.33671	-	[expression too low]
phV86	Vocar.0030s0081	Vocar20013201m.g	von der Heyde and Hallmann 2020	30	717804	722763	++	-	MYRASMGTRVVFVLSGLWLAAMSVTAEHSLQGLEFVPRFTRLLRQDLSSVASYLLPTEQPPLCAGQCCQADSYASPYGLLSMSNTQQIFGGRTYTTFSFILHSNQTCNSALDHAGCCSSAAYIVWIDVDPTLKVKYVSYNGVRLASAEQSQFGLKLGSLNLQVAQAKNGIPVAITVEGAADTLCPPPGLAPVTGLCELVIQGGTDINPNACCPTTVTAAGSGPSSQPGPNSVFQCSGTLSNSPFKLVFDGVTPISSQSTSTSLAQAQFLAYNFRLVATSSCEPDGVTNCCHAQLAYVNLKVTDLPISGVQLGRSSVNFSTSSWNEPNSASYRSLLVDELNLVADDLGSNGLALTVTVRLPIGSTASNVDLCDASSDPQQGACTYYLHSEDGFCCPSGLV…	831	6	6	431.924	111.355	271.639	0.257811	gonidia
phV87	Vocar.0031s0078	-	von der Heyde and Hallmann 2020	31	1023067	1025910	+	-	MPGMHRIVLLPNVPFPPVTVSITTCHRVQQFLVNEFTTIVSALNLTMSTAFAVDPSKCLPTTITVCGTFDEKPVIIDQLADSMKYAVDAVVRDLMNEFCALSSGMSVFLDTDGNCFDVLSSSQSTRRLFDLSPQSTRRLFDLSSPWSCSRPPTPFPMCKCNQRVGITPFYSPSSISMEPGRLPSTTLYCFIIDQVPNKFLKTVPSCGPTGVLDKVEVYADEKRRRNITGIRVTPSGGPTRWLSPSWGANGTNTLKVTPLSWNTTRAVGSSVCLELTVPLYTFCQGTNVCYLSLFNENNDCCPTYPAALPYASS	313	6	6	49.5978	8.08058	28.8392	0.162922	gonidia
phV88	Vocar.0031s0086	-	von der Heyde and Hallmann 2020	31	1104183	1109320	+	-	MKPRHPSWGLWLRCLVCCALLAPSWISTAAADTFVEEELQGAVDPRFPYCDCLRQPAYPSPYSITGGVTVKGPGMYCFTIRANATNCRGPCCNVDLKKIEFDVYGKCAAKYASIKALVNGKFTSVGPSIYRYTMPDGSYRFILRLTNLNMGLSDNNAELCLNLTAGVNGAGCDTLEEFCVPPSASSPPGTCQVALLNSLNSTDTCCPISNVIPARPPPPPPSPRPPSPPPPSPAPSPPPPPPPPPSPPPPPPPPPPPPPPLPPPPPPPPPPPPPPPPSQPPPPPPPPPPLPPAPPSEVVKTECEGCIRITIRDAPTFPPLTIGRNLCTRVQEYLSSSAMTILQSFNASIRQEYAVNADNCMADSIRICGKFQVNSALIAKLEENFSYAFRFAFSELDKA…	600	83	83	106.068	14.3577	60.2129	0.135363	gonidia
phV89	Vocar.0031s0087	-	von der Heyde and Hallmann 2020	31	1111737	1117064	++	100	MARRHPSVYFAPKLLVFCCCLLAIYLTPIALAEEDGFVYEEPQGGVDPRFPYCSCYRLPGNPSPYSFSPVANIKGNNMFCFTLKINTQGCVGRCCNVDLNKIEFDVYGKCAAKSASIKALVNGKFTSVGPNIYRYTMPDGSYRFILRLTNLNMGLSDNNAELCLNLTAGVNDAGCDTLEEFCVPPSASSPPGTCQVALFNSADSTDSCCPIRYVSTPKPPPSPRPPSPPPPSPRPPSPPPPFPPPSPSPPPPPPPPPPPPPPSPPPPPPPPSPPPPSPPPPPPPPPPPPSPPPPPPPPPPPSPPPPPSTPPPPSPPMRNEFCPLAGNMAIYVEPQPGGNTCLNFEDYKQCEPPTKPFPACNCNTTVATTPFYISSSVTTEAGRTPSTSLYCFTVKQVPV…	539	100	100	449.679	126.06	287.87	0.280335	gonidia
phV90	Vocar.0033s0047	Vocar20003588m.g	von der Heyde and Hallmann 2020	33	358033	362532	++	-	MQVGFRRQSCRAALQLRFNWRLILLWCFVFSAYVHGQRLKCREGGGPYQLGPFVHQDGSQRFCFSVLSSLRICRRENGCRMLSDMNITLGPACCNAHALTSAVLQSRTERVHVDGRFISCQASGLGLPVLQLSGLRLRSTLNKNVSLCLKLKNPACQMSGSLCGFKGNSRRQNGNCSVTLVESPSETCFTTSVAQLVPPPPSVLLPPNPFLPPFPSPPPPVHPLPPPPPLSPAPPPKPPPECSYCVQVGVTPPNALAANQNPFTLDCDGAARRLASYLEYRFRLSDLSLAKQFNLDSCQGTNDSANSSAVGEQFVRVCGMYSAPLPTDKLPFTDISRYLIESSNMPMRLVTGADNTSSCTYDARNYTFTLRSFFVKGNSLLCSGNVGYANGTDHICIPK…	946	43 + 66 + 49	158	489.824	1493.02	991.423	3.04808	somatic cells
phV91	Vocar.0033s0108	Vocar20003715m.g	von der Heyde and Hallmann 2020	33	851789	856507	++	-	MKQVGVVAVLAAAAFVVAVNAQTGRYPFFPFCQCTKTPSPYKLSPSVKAMGKGRFCFTLNVNPPACSFPCCKADLRKIELNVNPECDAFGVTIRATVDGKFTPVAPSFDEPDQGPIGAKILRIPQLGLGLNSDGAEICITLSKPKGGAGCTTLESLCVPPGNMTTGVCSAALFDSSNDCCPISSVNVPSPPPPSPPPPSPPPPPPPPPPPPSPPPPPPPSPPPPPPPPPPPPSPPPPPPPSPPPPPPPPPPPPSPPPPPPPSPPPPPPPPPPPPSPPPPPPPSPPPECVLCTSVIYSSAGSIFSYSVPKSTCDQLSSEISTSITAQANAIGAAIIPTPAAITCESDKITVCTTFLSAADAQKLKEDNWLDSQVAIWVSRATQNCPATLDGYSVSVFADS…	571	99	99	2155.78	1529.27	1842.52	0.709381	similar in both
phV92	Vocar.0033s0126	-	von der Heyde and Hallmann 2020	33	969658	980827	+	-	MTERLVLLLSCWLMVILGCLRTTASAERSLLQAYLETFPPYGCNRDPQQSRFRLDPVYTVSGNRVCMTARVVDCAKPGSDCCDPKIDFYKIELDVNKQCKGAVTGVTVNGKPALAPTFDPYATNDTKAVIKLTGLNLDLATADGAVVCMTLGGSCPSMETLCAEGNGFCKYAVVQSGTCDCCPVGKLGFFAPPPSPLPPSPFPPSPSPPSPLPPSPRPPSPSPPSPMPPSPRPPSPLPPSPLPPSPVPPSPLPPSPKPPSPLPPSPLPPSPLPPSPLPPSPRPPSPLPPSPLPPSPLPPSPKPPSPLPPSPLPPSPLPPSPLPPSPLPPSPLPPSPLPPRPLPPSPLPPSPKPPSPLPPSPLPPSPSPPSPLPPSPRPPSPLPPSPLPPSPLPPSPLPP…	618	319	319	210.675	795.537	503.106	3.77614	somatic cells
phV93	Vocar.0033s0128	-	von der Heyde and Hallmann 2020	33	1001204	1003662	+	100	MTARVVDCAKPGSDCCDPKIDFYKIELDVNKQCKGAVTGFTVNGKPALAPTFDPYATNDTKAVIKLTGLNLDLTTADGAVVCMTLGGSCPSMETLCAEGNGFCKYAVVQSGTCDCCPVGKLGFFAPPPAPLPPSPSPPSPSPPSPLPPSPRPPSPSPPSPMPPSPRPPPLPPSPLPPSPLPPSPLPPSPLPPSPLPPSPKPPSPLPPSPLPPSPSPPSPLPPSPSPPCPLPHSPSPPSPLPPSPRPPSPLPPSPLPPSPLPPSPLPPSPKPPSPSPPSPLPPSPRPPSPLPPSPLPPSPKPPSPLPPSPLPPSPAPPSPLPPSPLPPSPSPPSPLPPSPRPPSPLPPSPRPPSPLPPSPSPPSPRPPSPRPPSPSPPPPPPPPPPPPPSPPPPLAPFTP…	562	268	268	31.4461	137.331	84.3885	4.36719	somatic cells
phV94	Vocar.0033s0180	-	von der Heyde and Hallmann 2020	33	1439273	1441872	+	245 + 100	MRVLLSVALSLVLIGCLHAVNAERNLLQSYLETFPPYGCNRDPQQSRFRLDPVYTVSGNRVCMTARVVDCAKPGSDCCDPKIDFYKIELDVNKQCKGAVTGVTVNGKPALAPTFDPYATNNTKAVIKLTGLNLDLTTADGAVVCMTLGGSCPSMETLCAEGNGFCKYAVVQSGTCDCCPVGKLGFFPPPPSPLPPSPPLPPSPLPPSPLPPSPLPPSPLPPSPLPPSPLPPSPLPPSPLPPSPLPPSPLPPSPKPPSPLPPSPLPPSPLPPSPLPPSPLPPSPLPPSPLPPSPLPPSPLPPTPKPPSPLPPSPLPPSPLPPSPLPPSPLPPSPLPPSPLPPSPLPPSPLPPMPMPPSPLPPSSLLRSPLPPSRPPPFAPPFTPVRIRSPFPFCDCNRTL…	546	194	194	17.4988	41.9317	29.7153	2.39626	somatic cells
phV95	Vocar.0033s0181	-	von der Heyde and Hallmann 2020	33	1444359	1447067	+	-	MNVARKRARQATLLQCGMKSLAPNAPVSDRAGFAPVRLDDAVVEAQRERMEHEEVARRERNAVNATAAGEARLALTPQPGIRPVGRPLQQMSTSRSWMQSSACYQRTRWRPCVQQRISRIIQNLLGRFQSAKMVSVRMMKRLVLLLSCWLMVILGCLRTTASAERSLLQSYLETFPPYGRIAPYGCNRDPQQSRFRLDPVYTVSGNRVCMTARVVDCAKPGSDCCDPKIDFYKIELDVNKQCKGAVTGVTVNGKPALAPTFDPYATNDTKAVIKLTGLNLDLTTADGAVVCMTLGGSCPSMETLCAEGNGFCKYAVVQSGTCDCCPVGKLGFFAPPPSPLPPSPSPPSPSPPSPHPPSPRPPSPMPPSPLPPSPLPPSPSPPSPSPPSPTAAHPAASIP…	422	55	55	13.8187	18.4946	16.1567	1.33838	similar in both
phV96	Vocar.0033s0182	-	von der Heyde and Hallmann 2020	33	1447190	1448861	+	-	MPPSPLPPSPLPPSPLPPSPRPPSPLPPSPLPPSPIPPSPSPPSPLPPSRPPPFAPPFTPVRIRSPFPFCDCNRTLPGLVPFNFDKTPSLSLNGANRRYCLTLRTVPCADPSSPCCDQALSKVEWWSRESCRGSVRAVYLDGIKIDSQWGVNGTFKIPQLNMAPSSVPLQGRQVCLELLSASTCPTLATFCAKGGQGACTYSMFSEDKDCCPIGTFVTLGRRR	223	67	67	10.5254	17.6212	14.0733	1.67415	similar in both
phV97	Vocar.0034s0002	-	von der Heyde and Hallmann 2020	34	8519	11800	+	100 + 100	MTERLVLLLSCWLMVILGCLRTTASAERSLLQAYLETFPPYGCNRDPQQSRFRLDPIYTVSGNRVCMTARVVDCAKPGSDCCDPKIDFYKIELDVNKQCKGAVTGVTVNGKPALAPTFDPYATNDTKAVIKLTGLNLDLTTADGAVVCMTLGGSCPSMETLCAEGNGFCKYAVVQSGTCDCCPVGKLGFFAPPPSPLPPSPFPPSPSPPSPLPPSPRPPSPSPPSPMPPSPRPPSPLPPSPLPPSPPPSPLPLSPLPPSPLPPSPLPPSPLPPSPLPPSPKPPSPLPPSPLPPSPLPPSPLPPSPLPPSPLPPSPKPPSPLPPSPLPPSPRPPSPLPPSPLPPSPLPPSPLPPSPLPPSPLPPSPLPPSPKPPSPLPPSPLPPSPSPPSPLPPSPRPPS…	618	264	264	23.7153	95.5183	59.6168	4.02771	somatic cells
phV98	Vocar.0034s0061	-	von der Heyde and Hallmann 2020	34	534023	538072	++	-	MGTSKPRTAACYLGTVLLVSLLRLARAQGTAVPGDAQYLFGFPFCQCDDYRCTSSPYKPTVASQENLANGQYRVCFSFQDVGCTSGNVCCEAILQQMSKVEFQADKVCNKSIVAATFGGVSFTGSTYFELDNAVGKVRVAGLAATRTMVRNSQLCFTIRPPCASFDIFFQSAKLGLTGLFQYAIFDQTHNCCPTCALRPPSPPRPPPVSSPPPMPTPPKSPPPPPPPPPPPPPPSPPPPPPPPPPPPPPPPPPSPPPPPPPPPPPPPPPPPPPSPPPPPPPPPPPPPPPPPPSPPPPPPPPPPPPPPPPPPPHPPPPPPPPPPPPPPPPPPPVPLAPSSPYCDCLSPLVNTNSRWAVSYVASNITNGELLYNFKISLNDGTHCRAINYRNGSCCNATLE…	850	142	142	519.014	123.421	321.217	0.237799	gonidia
phV99	Vocar.0034s0075	-	von der Heyde and Hallmann 2020	34	732748	736023	++	-	MSVPSGPWNTTASSATYCFRVAATATVNSASPCAGMTINRMEMIIESGCVDEEPKPVRTATINGVSVVPLLSSKTWKGETYGVMTLRRLADIFPTTPSGGLYICLELARTSRCSTPAGMCYGNSCVFALSNDDFTCCPVSEVLV	144	0	0	4.59456	124.908	64.7513	27.1861	somatic cells
phV100	Vocar.0036s0021	Vocar20004063m.g	von der Heyde and Hallmann 2020	36	130969	135967	+++	-	MGLPTTFLFLALASVGCLQTANAERRLLQSYLETFPPYGCTRDQQQSRFRLDPGYTVSGNRVCMTVRVVNCFKPGAACCDPKIDANKIALDVNIECRNAISGITVNGRPSLAPTFDPYGADNSKAVYKLTGLSLNLSNADGAVVCMNLGRTCRTMEQLCPEGDGSCTYAIVQSGPCNCCPKGRLGLSPPPAPDSPSSPLAPSPLPPSPSPPSPSPPSPSPPSPSPPSPVPPSPKPPSPFPPSPMSPSSPSLPEPSIPIPTTFTSFPFCECKRFPSGLVPFEFDEVTTVRRVGTNRRYCMTLRTRPCSMPESPCCNSALSKVEWWSRDACRGAVRGVYLDGARVDSQWAPNGTFKIPTVNVAAVSVPTEGRQLCFDLSTSSACPTLESFCARGEGGSCLY…	418	72	72	37.8609	597.797	317.829	15.7893	somatic cells
phV101	Vocar.0041s0078	-	von der Heyde and Hallmann 2020	41	785136	799337	+	-	MRTWSGPTGLKQLPVATASGAALLVLFLGIAPLVYGRDDHAGYGGYVSAKPGSRFISRLALLSTTEFPYCRCSRGTSNNPYDLVFKYSRSQRDGTVRNCFRVAQVRYCSALAAGSRPQQCCDTISADFHKLELEADPNCKGSVRGVSINGRSGKAWQWVTNDGPSSSLKISSLRWNLSIAVGSEICFTLGAPCPKLSSLCYNGGGGTGGACRFALFDSGESIGTECCMLGSMELTGSPPDVPLPPPSPPSAPAPPVPRMPPSPSPPLAPREPESPMPPFTQTPPSMPPSAYPPLESTPPWIPWEPAPPLNVIEPPSVPLLEPPSGPQSFPLPPPPSSQPRDETSDYQSVGVPLPPSAEGLITPGVPLAPSEPDESSRLSEAAALGDYVNLAGNSQSAFL…	2022	1138	1138	160.027	187.99	174.008	1.17474	similar in both
phV102	Vocar.0043s0060	Vocar20011130m.g	von der Heyde and Hallmann 2020	43	632273	638314	+++	-	MASSSHMGQLAIHSFCGIVLLSLVFSAVASGENAVSLQWSSRHLLTKSIGGDFPYCKCTTYNCLSSPYRLSYTGAYPVMAGTRHCFMVQYVGCTTNTTCCAALQHNVDKIFFSIGAGCLKPVTSQVEINGRKWSSWSTVSTKRGTDTNGTVVFGYDVRIYDMQFNATTFPGTSICMTTKEPCASIQQLCGTTTGTCKYAVFDSHNASRCCPVCTVAPVPPPAPLSPEPPSPMVPPPPPPPPPPPPPPTPICRSCASITIQPPSNTRPVNTFFSTPEKCNQTSSIIISNFTAALEAAGVSIRQPFTWNCTGNYEPGQSFMLRLFVCGLYDVPTNRTILEEALRNLTASWVAFVIGTPVVLGQKDRAECPVGLEGYVFEGALDSGINADPRCPYGSSIINC…	569	33	33	966.048	63.036	514.542	0.0652514	gonidia
phV103	Vocar.0046s0015	-	von der Heyde and Hallmann 2020	46	277817	281459	+++	-	MVMLPMTLAVHVARKERALLSPSNNLHRQQLPLFSCLATVAMLRLIPYLLLLLLALPGGTLAQTVPGCGSSAFIYRNGVPANSIDVMFRDSQTGESVGWGYIAMNLSALTLPEPIATDQTVPGTINIAVKLGAFVGSIQGSVQTESMFQSNYPGGGASCSGDSNSYISFPMDMPQNVVFASTMDYNGLLTGILTNPILGIPQCQPIVLYLLAKFTDKNNSSRSAYLATDWVSAGNASDPVCANSPTSWGYIKAEFGVCNCPPSPPLLPPSPNPPMPPSPSPPSPSPPSPLPPRPPFPLPPPPPPPPPPRVSPSPPPSPSPPPPLPPPSPPPQPPPSVPSPPPPPPSPAPPLPPPPSPPPSPPPSPLPPPPLPPSPPPPSPPPPPLPPPPPPPSPPPQPP…	627	198	198	2871.52	67633.4	35252.5	23.5531	somatic cells
phV104	Vocar.0048s0025	-	von der Heyde and Hallmann 2020	48	497750	505027	+	-	MARSKPLQVLLWAAVVLLSAGLVVAQEDSADVAGLLTFPWCQCSTYSCACSPYKLEIVSTKTVGTATTTCLSVYEIGCDLSSACCRGMRGAIDKISFDSTSKCGNKTAFLNVTLDGKRWVSWDVIPRNPGFDFKIYNLNRNISSFPGSVICISSRAPCSTVDDWCFYNKTRTCRYSLADSGATNWCPTCTNTLLPQPRPPPSPQPPPPLPPSPPPKKRKAPPPMLPPSPLPPSPPPPCAADIYIHLLAPLVTGGPYTFNDAICAGLADRISADLAAQANAVGSVIVDSFDLTTCDSSYIKVSGSFRGPYDGKLLETWLNSPSGMESWVTAITGGPTCSPSLAGYEVFATVVAPDGGFTCMAAEWTQECPLPPPSPLPPSPQPPSPLPPSPQPPSPLPPS…	1052	43 + 160 + 41	244	40.979	7.10046	24.0398	0.173271	gonidia
phV105	Vocar.0050s0044	-	von der Heyde and Hallmann 2020	50	443615	447673	++	-	MSSRLHSLALWPNLLITILPLLAAKPLPDWLHRLDWWSTGEQRPGVSNGHIKAVDLGAGSSALVGQDEQLPHANAHQQAWQQPQTQTQQQQQHQQQQWVEVGSTRSWTHLAILQAGGCIDTTCTAPYTMYIDSTDPAYGITATTDWPAAGIIFSSSTSGDGSSSSSSSTSSSDPGKALDGNSAGMASTDTDSSQDVCLMLVATGCFAPSARTPCCAALARHLRQIEVAIDSACADAVSGATLNGISLAKYISVVNTSTSSSSPSSSSRLRIGGLQLDYWSALNSRLCITLRPPCNSLAKLCGSKSAAGTSYCLVSYENKAGDAARCCPTCQLPVGDESGDDGPGGGGGGGGGGGGGGGGGGGGPGGGGGGGGGGGGGGGGQLLAAAWGLRGRDPWVGST…	566	0	0	382.357	143.806	263.082	0.376104	gonidia
phV106	Vocar.0061s0002	Vocar20014359m.g	von der Heyde and Hallmann 2020	61	12154	15060	++	-	MAMLRLIPYLLLLLLALPVGTFTQTVQGCGSRAFIYHNGVPANSIDVMFRDSETGASVGWGYIAMNLSALTLPEPIATDQTVPGTINFAVKLEAFVGSISADVLTESMFQYGYPGGGADCSSDPDTNGYLSFPMDVPQNVVFASTLDYSRLITNLLVHPLLGLPKCQPIVLYMRAKFTDKNNSSRSAYLATDWVSAGNASDPVCANSPTSWGYIKAEFGVCDCPPSPPFLPPSPNPPMPPSPLPPSPNPPMPPSPLPPSPSPPSPVPPRPPFPLPPPPPPPPPPRVSPPPPSPSPPPPLPPPSPPPQSPHSPPPPRPLSPPPLPPSPSPPPPPSPSPPPPPRPPPPAPKAPKSPRAPKPPKAPKAPQPPPRPANNLLVNKFPFSSCSASDVSLTPYRMT…	615	149	149	246.293	5211.86	2729.08	21.1613	somatic cells
phV107	Vocar.0064s0013	-	von der Heyde and Hallmann 2020	64	166389	174698	+	-	MAGVPASAAVASSRRHPGSISPSEAGPDRLSQQPNAPKDSAGAITIPAPSSSPVCSLRRSNGIGRNTTFLWMLLLTTTVGIEAAAPPPPPISLACGNDIHILYGGADITTAADVPVPFRASDTGSVAINQSVISMMDYPISVGNYYAGRLADLYFNNTMSSFFVSYFRVLPNRTFLKRFNGTSGCSPLSANEMANTTHTYPIPPGIKASFAIYSAVTSPPAGSDFSGFSYCSPFPFYFFALLQSVDASLTPVSGAPEIWLSANWVTANDPNDPVCPNSPTSWGYVPLELFYCPCPAPPPPPAPPSPSPPPPSPSPPPEPPSPPSPPPPSPPSPTPPSPPSPSPPSPPSPSPPRPPSPTPPRPPSPTPPRPPSPTPPSPPPPPSPPPQPPPSAPSPPPPP…	707	299	299	20.7354	38.9899	29.8626	1.88036	similar in both
phV108	Vocar.0070s0021	-	von der Heyde and Hallmann 2020	70	191077	196438	+++		MKINIQLRNILLAALLCSALSGLAAEEWSEPPVALDAEGESSRDASFLPAPSEPDSPSTPDGQTGVGLASDAPPPRSRPPRSPAPPRPPPVSRPPSPIRSPRPPPNPRRPPSPRPPSPLPPSPPPSPPSPPPSPPPSPPPSPPPPPPPPPPPPLPPPPPPPPPPSPPPPPPPSPPPPSPPPPSPSPPPPPPPLATNAVLETDFRFSVCDARNASLTPYRLSSPGNPVSVNGSFATYCFTITADALVQGSSSSCAKMQINKIDFIINTACVAEVPKAIRNAIVNGTVVSSFRFETKTFDGNPYGMLAVSGLKDFTAGLLAGNPLQLCLVMRRSSICGTPQTLCYGTSCVYTMYNEDRSCCPVSQVSFFAPPPPPPSPPPPSPPPPPPPPSPPPPLSPSSP…	572	120 + 35	155	16729.2	5763.99	11246.6	0.344547	gonidia
phV109	Vocar.0083s0018	-	von der Heyde and Hallmann 2020	83	147399	161274	++	3722 + 2624	MHTYIQINPNALQPAVLSTEPACEPALSAVTYPLFFDGKPVTVNVDFDKVPPSLAYRLRWTSMNKTPGQLKGRRICIRAAAPCNTANNLFINVGSYPAVSFIDVDHTCCPALPSPPAPPSRPPQAPVSGLCSYVCFYWRRADGPVDRPACDIFANRLRDFADWVENRTASLGINNIPKYYYLEKFTCNSTANSTMKACANFTLDRSADDFIKATINGDNRTFNEPGLKILASSQYFNLKSGVRADASGNPVCSPSQLRVEQLKKPNGTLEICNLDNLTTPCTPRPPTSFPYCNCKQANITKTPYSLSYSRMSQEISKGTLISNNYCFKITADRSRCGNATCCDMNLDKIEWLLNFPCLRSFQTKITIRLSGKQPRYIDPVWSSSNDTSFKPSKMMAILK…	464	17	17	8319.67	417.384	4368.53	0.0501683	gonidia
phV110	Vocar.0252s0001	-	von der Heyde and Hallmann 2020	252	14	7063	+	-	MGPFNVTATAATYCFRISASATVDSTSPCARMVINELQIVIDPSCVESFPNSFRVTTVNGVTVSPSYSYKTWREQTYGVMTITSLASTFPVTPPGGLYVCLAMSRNSRCGTPAGLCYGNSCVYSLLNADDSCCPASQVPY	140	0	0	843.375	17766.9	9305.14	21.0664	somatic cells
sex-inducer	Vocar.0027s0164	Vocar20014604m	Starr and Jaenicke 1974	27	1542465	1547696	+	-	MAVVVVNSATASLLAVCLVFMAVGLCTGQIVDVKFPSCRCERELTPFAIKSAATQLTSRNPGVVNLYCFEIGIVNSGSGACYTEPASQNLSKVSVYAQAAQRDRLSAFGVLLAGAPVSNMTYLTPRWDSLNMTTISNLNFSKTQANGTRICLELFKPTTINEFCEREGASGSFCWVALFNDNNCVPPNSTVVISKRLCCPRFQSILSP	208	0	0	540.603	1904.39	1222.5	3.52272	somatic cells

## Sheet: C. reinhardthii
Common name	Chlamy v5.5 ID	References	Scaffold	from nucleotide	to nucleotide	Deduced amino acid sequence	Sequence length [aa]	Length of individual proline- rich stretches [aa]	Cumulative length of proline-rich stretches [aa]
GAS28	Cre11.g481600.t1.1	Hanschen et al. 2016	11	3554838	3557651	MIRGSPRLYGGVLLVMVAAAMLLAAPASADSEYFGLRGGGRVLHQKKAKAKAAPTPSPAATSPAPKLVFPPLCNCERNPRKSPFRMSLDDAASAGGVYCFTIQNVGGCDPTQKCCDGTQGVSKVELDVVASCKDSVRNVTVDGKKWSYEFNTALSVIRITNLGKTASTAAGTEVCLALAPKSQCPGLAQLCSAGAGLCKYALFNQDRDCCPVSILGNAPPPPPSPSPPSPPSPSPPPPPSPPPPPPPTPSPPPPELPPAQPDAPARKRPPPPASPPPPRSDFPFCQCQRNARGSRLMTTASNNITVVNGLTRICFNVALKDVCENPNSKCCEFELYKMEIEADPTCADALAYTSVDGATRAKFFQTRPYPVIKITNIDKPANTVDGTEVCLFMSSKCNT…	433	61	61
GAS30	Cre11.g481750.t1.2	Hanschen et al. 2016	11	3571847	3575932	MRSQSSRALVGGALLILLSGVLVFAAPTMADSGLRGRALLQKKKASPSPARSPTPSATTTATSPAPKLVFPPLCNCERNPRKSPFRMSLDDAASAGGVYCFTIQNVGGCDPKQKCCDGTQGVSKVELDVVASCKDSVRNVTVDGKKWSYEFNTALSVIRITNLGKTASTAAGTEVCIALAPKSQCPGLAQLCSAGAGLCKYALSNQDRDCCPVSILGNAPPPPPSPQPPSPQPPSPSPPPPPSPAPPSPPPPSPLPPSPPPPPPPSPPPPPPPPPPPPPPPPPPSPSPPPPELPPAQPVTPARKRPPPPAPPPPPRSDFPFCQCQRNARGSRLMTTASNNITVVNGLTRICFNVALKDVCENPNSKCCEFELYKMEFEADPTCADALAYTTVDGAYKAK…	472	96	96
GAS31	Cre11.g468359.t1.1	Hanschen et al. 2016	11	1966744	1970333	MGRFRRAAGALLLLAFGLSLIPSGYAQDGLPVDWGQDSTAALATFPYCQCNDYRCKASPYRLRLGEVGPSGTSGKLDKICYNIEMPGCSDATNQCCKIIGQRLDKIEFEVQEVCQKAVRQVTLNGQARTFAFLTQYNTGVLSVRALAQLNGGANGSQLCIHVNNTAAPTCNTPAALCQRGDGTCRYTMFESSSHSCCATCIEGLYPSPPPVTPAVRRPPPSSPPPPPSPPPPPPRSAAAAYADDLAALTNSLDDLQVQCDKIASYAEWASLRVNHTKCATTAIWHDKSPIQXXXXXXXXXXXXXXXXXXXXXXXXXXXXXXXXXXPPPPPPPPPPPPPPPLPPFPAKPPMSPCDCLSPLIDNHSRWRFRFQESTAIGSDNVFIFTLSVNPDAKCSPITY…	704	17+24	41
phC1	Cre17.g717900.t1.2	Hanschen et al. 2016	17	2693612	2695892	MRLTGFALAVIGLLAIGASAQQTGLYTSFPYCQCTKTPSAYRLSPTVTSTGAGTYCFTLSAKVPAGCTHKCCKADLKKIEFNVNDACDVFSPSLKATINGVRTKVAPAINKAQNGPVGSTTLVLTQLGLGLGNDGAQVCITLGLNKNGKGCTTLEELCVPPAGMPAGVCTAALFDSQNDCCPLSQANVPSPPPPSPPPPSPPPPSPPPPSPPARCRVCAYIALLDVNNNAPFPYSFSDDQCVEVSDVIVADITAQAESVGATIVSDFALVSCQGQQIKVCGEFFSNEEGALLQGFVSEQVAIWRDLITMGSCPAYLTGYTVVAAVGGDGTDVNNLPVTCLAAASSTACARETVDFPKCQCVTQPFSTPFAAKPVVTTMDGPTKGTTAYCFETMLVTPNN…	510	24	24
phC10	Cre09.g404201.t1.1	Hanschen et al. 2016	9	495000	503449	MGLSLSWAALVLAATLLVVADAQRQSGLYTNFPFCKCVARGRYSLDRVVDSVGAGQYCFTIRVQTPAGCNGYCCTQADMHKLEFHAQPQCDINNGASVSATINGVPTRVGPAYDQPPDGPPGGTILRLTQLGLTAATANGARLCIKLTAGRNGTGCGTLEQMCVPPAGSPPGVCTAAIFDSGNGCCPQVQAGTPSPPSPLPPSPRPPSPKPPSPPPPPGPPPPSPAPPSPSPPSPPPPSPQPPVPPSPAPPTPPGPPPPSPAPPNPPPPPSPAPPSPKPPSPEPPSPPPPPSPEPPSPKPPSPEPPSPQPPLPPPPPSPYPPSPSPPSPPPPSPPPPSPAPPSPAPPSPPPPCEVCLQLSITAFPAPESFPPFRLPVSLCDSLLAQLNATITASGVTVL…	1339	159+530	689
phC12	Cre02.g095095.t1.1	Hanschen et al. 2016	2	3345375	3351647	MCSFSSRRGRPMARLLLLVTLAVALVVQQAAAQGNSKGVNRNPLFPDCKCERDRRSSPYRASLTSTEDYPGGRRYCFTFDVVSCQVDNPCCYMNLYKIEFPFTYDCRGSLQYIEYQGGNRSIIWGPSYLNADIPRVDLKITNMRLSQTNAAGQGICLGIADYCKEIDQWCWPNTGKCRMAMFNADPFDCCPIQNFPTTDSPPPLTPAQRQPPPPSDVSPPPPPPPPPPPPPPPPPPPKTAAPPPPPGCTVCVRLKLATIPAGGTYEITDAQCDDYQATIADAANEAANTYGAMMTKPFQPDINLCYPDEVSVCGTFFSAAEGEKLQDWIDFDGALDDVVNLITGGSCPAELSGYTVVAFLTDAVEGESCLTGSSQQACALLSPPPPPPPPPPPPPPPPP…	980	19+271+19	309
phC13	Cre14.g620702.t1.1	Hanschen et al. 2016	14	1873369	1877024	MRSSYSLVAVLVAAAFAAAQGAQSGLYTSFPYCQCKKSPSAYKLGDVVVAKGNNQYCFKLSAKVPAGCTDYCCTKADLKKIEFNVYEACDVFGEVVKATINGVPTKVGVSFHEPIDGPVGSTTLVLTQLGLGLASDGAEICITLSLNKNGKGCTSLEELCIPPPGLPKGVCSAALFDSQNDCCPISTPGIPSPPPPSPPPPSPPPPCTACVYLSILETGNVVFPYEFSQQDCDDYAAMIGDELQTEAENLGVAINFAPAVCSGDVIKLCATFFSSEQGAELQPFIDERLPFWLQLITGVQGCPAFLTGYSAYAAVGGIGGSAQAPDASCLSGFQSQACAPEPVDFPKCACVTTPGATPFAFTPVISTMAGRTKDTTSYCFSITLVTPNSATSPCGRSTS…	501	16	16
phC14	Cre10.g451752.t1.1	Hanschen et al. 2016	10	4481576	4488961	MASRAFITFAVLLFAGSAFAGELGVTLARGSARELLGATPRFPYCSCDVYDCACSPYNVTMASVTNVVGGKRFCYQIGYLGCPTNRPCCNALKANVDKIAFTTSAACQKKNGGVTRVEISGNLWRSWETREWALGNGDYGYELRIYDLDGTNSNNFPGTRICVTTGAQCNKLAELCDIDGGNCKYSLAESSNTKYCPICPVPPTAKPSPPPPSPPPPPPPSPPPPPPSPPPPPPPSPPPPPPPSPPPPPPPSCALRIIPPAVTRPGQKPTWGNTGAAGLPNCLDVANIMTDTLNIAAEDADARMVWPFEYRDCITEYGAQNPSVVVCGTFLSAEDGALLQDEINDLLELILSEVKGGESCPPRLSGYTLLATIEPVDGSPDCLSGTSSSACAPELTPAP…	553	55	55
phC15	Cre09.g396100.t1.2	Hanschen et al. 2016	9	1809519	1811468	MALLCLGAVSAARAGAKGSSSLWPALSSCQQKANSTAFRINSATTTALPGNTVCFGFSAVAAPAGNCGKASTLERVNIWASHANRTMINGYSIRTATTTTAVSGVWSKKGDSWDELTFSKLGWTADYVMANSPRICLTLDHDVTLDDICVGNGPCVVALYSVGAKNSKCCPVYKV	175	0	0
phC16a	Cre02.g078777.t1.1	Hanschen et al. 2016	2	771148	777657	MAECHAPVARVAIIVALLISAASAAGVSTLSISPDLAAVRSGVGRGLLTTASGFPWCQCIDYDCACSPYKVNFESSTQSGSLTTTCFSVAYIGCNTSRACCRGMLAAVDKLTFETTAACGVKSNIAGITINGKSWPSWNPYPHPSGPGTGYELKIYNLKGNNGTFPGSKICITTKAPCSSLKDLCSSSPSGDCTYSFADTSSTTYCPICPLNVYPPPPPPSPQPPSPGPPLPPSPAPPSPSPPLAPQPPPTPPPPPPPPPPPSPPVPPPPPPPPLSPPPPPPPPPPPPPPPPPFPPPPPPPPPPPPPPPPAPPPLPPPPPPPPPPPPPPLPPPPECPEVCATVQIIPPDSLFSNEVPANIFTFDGTEDVAWRHSPLFPCKGEPPSLVTFDGPDGVDCAS…	721	120+45	165
phC16b	Cre02.g078804.t1.1	Hanschen et al. 2016	2	778398	782412	MELTELSRHFVKTSSALRRLPMVAGNMVGAAIIAVVIMASGLGASAASDFSVSSHSGRGLLTTASGFPWCQCIDYSCACSPYKVNFESSTQSGSLTTTCFSVAYIGCDTSRACCRGMLAAVDKLTFETTAACGVKSNIANITINGKRWPSWNPYPHPSGPGTGYELKIYNLKGNNGTFPGSKICITTKAPCSSLKDLCSSSPSGDCTYSFADTSSTTYCPICPLNVYPPPPPPSPAPPPPSPPPPPPPSPPPPPPPSPPPPPPPSPPPPPPPSPPPPSPPPPSPPPPPPPSPPPPSPPPPSPPPPPPPPPSPPPPSPAPPTPVPKPSPSPSLVKTHICVQSTNNIPFAISDLVISPTVDQLGLPAVSMCVSASSATCRRGAFCCKMDFAKMELPITTEC…	488	103	103
phC17	Cre05.g238687.t1.1	Hanschen et al. 2016	5	3039142	3044935	MRSLGLLVAVLALASTARSQSDDLDVLARAAAARGDPDFPYATCTRSPSRSIYSTLPVTTNPAPSTYCWTIRVSQSQCTTQNACCSADVHKMELDVDAACDVPSQKVTATINGKPTPQAADIVKPPNAADYQRTLRIPGLALNAGNANNAVVCIKLTGPCDTLAKLTPNDVWSTALWSTSHECCPISRGASPPPPSPPPPPPPSPPPPPPPSPPPPPPPSPPPPSPPPPPPPSPPPPSPPLPSASLFSIIPPSEYRELYTFTPELCARVADRVVDDLATIASDSDARLIKDFALSECVASYDVTTNSYPYMTICGEFFSKEDGDRMPELSDAMDSWIEEVSAASWVSRISSARLCRRRRPLLPRRRRPRLPRRRGLLLLPRLLPRLLPRPRHPLPLLLR…	768	51+49	100
phC18	Cre24.g755997.t1.1	Hanschen et al. 2016	24	118246	122121	MINRQAGARTHLAPVVILETSLHVATSERAEILASLPSQVRVCTRSAIAQAKSISSMKVAVVAAALAALVAVAAAQPPPPGFARFPYGSCSKSSPYRTYEATFPQGQSGNVFCWTLQYQGGRCSDPGFQACCQNDVHKFSLAFEPSCAPGFKASATLDGKAIAANNVVLETPPNADKRMTLAVKNLGLAGPEVEGRQVCITVQAGNCRTLASILPVFDQSPLWQNSLWSDDHACCGVSRGSPPSPPPSPNPPSPPPPSPKPPSPRPPSPPPPSPAPPSPPPPSPAPSPPPPSPVPPSPPPPSPAPPSPPPPSPKPPSPAPPSPPPPSPKPPSPPPPSPPPTCDFCVDYFLFPGLTRPELPWFDYYCDEAVFNLLEIYQPFKDDGTIISGAGEADIICKG…	648	99	99
phC19	Cre17.g696500.t1.1	Hanschen et al. 2016	17	49581	52364	MLLRVTASLLALCAVLLVGTVDARRSMLAAAGRTFPPYSCESDPSLSPFKLESAYTTSPSANGMRVCFNGAAPQPCPKDNPCCSKADFYKLELRVRPTCRRAIGSVTVNGLPAPVPTFEVFGSAHDKALFKLPRLNLTTANVTGAKICITLKDPCPNLEALCPEGDGSCTYAIGSMAAMPCKCCPVNKLGFFPPPPSPKPPSPPPPAPPSPSPPSPEPISPGGRRPPPPSTGGFPFCECDRKPGSMPFTLASAPVLSRSPTGQPLYCWTLQDSVCADPTSPCCNSALLKVEWWSYDTCRGSVRAYIDKVQYPVTWDRDGTFRLTKLGYSPSDVASKPKQLCVELRKDGPCPTIDKFCRGPNCVYSLFSTDKQCCPTATTPESR	383	37	37
phC2	Cre14.g620600.t1.2	Hanschen et al. 2016	14	1865969	1869014	MRCSILVSVLFAAAIAAAQGAQSGLYTSFPYCQCKKSPSAYKLGDVVVAKGNNQYCFKLSAKVPAGCTDYCCSKADLKKIEFNVYEACDVFGEVVKATINGVPTKVGVSFHEPTDGPVGSTTLVLTQLGLGLASDGAEICITLSMNKNGKGCTTLEELCIPPPGLPKGVCSAALFDSQNDCCPISTPGIPSPPPPSPPPPCQVCVYISLTVSDASRVLFPYSISNDECQGYIATIQDDVATQASDLGVTVTPGSTSCAGNLVMVCATFFSNEEGAKLQSFVDTQINFWLDMVTQGCRPALAGYTVVVSVGGMGDAVAGLPQSCINAQASAACALQTPDFPKCQCVTTPGATPFAIAPAMSSMAGRTKDTTAYCFSITLVTPNSATSPCGRSTSLLKAEF…	495	14	14
phC20a	Cre09.g388355.1.1	Hanschen et al. 2016	9	2905893	2909768	MRASALLALVLAAGLALGQTFPPYSCTRDPQQSRFRLDMPYTVAGNRVCMTTRVVPCAKPGSPCCDKKIDLYKIELDINAQCKFAVTGVTVNGRPALAPTFDPYGPSNSNKAVMKLTGLNLTLATAEGAVVCMKLGGACPTMDTLCTVGNGFCQTALVQSGTCNCCPVQMLGFMPPPPSPQPPNPPPPPPPSPPPPPPPSPPPPSPPPPSPPPPSPPPPSPRPPSPAPPSPKPPSPQPPSPRPPSPPPPSPPPPSPPPPSPPPPSPPPPSPPPPSPPPPSPPPPSPRPPSPAPPSPKPPSPAPPSPRPPSPQPPSPKPPSPPPPSPPPPSPPPPSPPPPSPPPPSPPPPSPRPPSPAPPSPRPPSPPPPSPRPPSPAPPSPAPPSPEPPLPPSPEPPMN…	573	223	223
phC20b	Cre09.g388353.t1.1	Hanschen et al. 2016	9	2901591	2904798	MRASALLALVLAAGLACSALGQTFPPYSCTRDPQQSRFRLDMPYTVAGNRVCMTTRVVPCAKPGSPCCDKKIDLYKIELDINAQCKFAVTGVTVNGRPALAPTFDPYGPSNSNKAVMKLTGLNLTLATAEGAVVCMKLGGACSTMDTLCTVGNGFCQTALVQSGTCNCCPVQMLGFMPPPPSPQPPNPPPPPPPSPPPPPPPSPPPPSPPPPSPPPPSPPPPSPRPPSPAPPSPKPPSPQPPSPRPPSPPPPSPPPPSPPPPSPPPPSPPPPSPPPPSPPPPSPPPPSPRPPSPAPPSPKPPSPAPPSPRPPSPQPPSPKPPSPPPPSPPPPSPPPPSPPPPSPPPPSPPPPSPRPPSPAPPSPRPPSPPPPSPRPPSPAPPSPAPPSPEPPLPPSPEP…	576	239	239
phC20c	Cre09.g388351.t1.1	Hanschen et al. 2016	9	2893511	2896174	MRASALLALVLAACLACSALGQTFPPYSCTRDPQQSRFRLDMPYTVAGNRVCMTTRVVPCAKPGSPCCDKKIDLYKIELDINAQCKFAVTGVTVNGRPALAPTFDPYGPSNSNKAVMKLTGLNLTLATAEGAVVCMKLGGACPTMDTLCTVGNGFCQTALVQSGTCNCCPVQMLGFMPPPPSPHPPPPSPPPPSPPPPSPRPPSPTPPSPKPPSPQPPSPRPPSPPPPSPPPPTPPPPSPPPPSPPPPSPPPPSPPPPSPPPPSPRPPSPAPPSPKPPSPAPPSPRPPSPQPPSPKPPSPPPPSPPPPSPPPPSPPPPSPPPPSPRPPSPAPPSPAPPSPEPPLPPSPEPPMNPLTPAIRRPPPPVPVSFPFCECNRTVGNVPFTFDPTPVVKKAASGP…	527	174	174
phC21	Cre02.g094450.t1.2	Hanschen et al. 2016	2	2808946	2813363	MARSNLRRPSPAKVASSAFLLALAAMKTATLLVVLAVGLGQVLADNSELFSSGRSLLQAVSGTTVFPYHSCNKKQPAGSPCYFGSPTTRVINSTVSEFCFTATCPGCRDASNNCCASLSKNIKKIIFNAKLSCRAPLKSIFQPVSWNGKPISSSLYIDEIPNVATMIRWTSIDIPASQLDGDRLCIRAPAPCNTVDSLFIMESQGFPQVALMDSTDGGNGCCPSRYPDMPPPSPPPPPPPSPPPPSPPPPSPKPPSPPPPSPPPPSPPPPSPKPPSPKPPSPPPPSPPPPCTTCIDVTIKKTADLAPGSIFQWDSEMCTDVAPQLVDDLQTRIEDANARVLSAFGIKSCAGEKLTICGTWFSKEDAALVNGPDGEYTRDMLLDWINIIAPDCPDYARGY…	819	61+74	135
phC22	Cre17.g696700.t1.2	Hanschen et al. 2016	17	66834	69000	MARHCILLALTLCAFASVALARDLLQATSSNPSWKNLFPPYGCDRNPNHSRFKIVPGYSVQADGSVCFTVMTQTCTGSATCCKVKTANKLEINVNPTCNRAILTATVNGRRTLAPTFDEYGTADQHALYKITGLNITSANADGSQICINFNPAGACKSIESLCPEGDGSCTLAIVQTDPCNCCPVNPVGLFPPPPSPSPPSPPPPSPAPPPSPPPPDAPARRQPPPPSGSTPFPFCRCNRTKDIMPFRLADQAPTVKKIGPNNAYCFKLLTGPCAEPGSFCCQQDLRKIEFWASDNCRSSVRQTYLDSVPVSFSWSTSKQGTTFKLPNLAIKSSDVPAQGREVCIELVASSKCPTLQTFCHYHPRAPGCVYSVFSNDAKQACCPSTSFPSV	391	36	36
phC26	Cre12.g551552.t1.1	Hanschen et al. 2016	12	9625548	9630819	MVLTTVACCALLRSAAGIALGSPPPPPSPPSPGSPSPAPPSPAPPSPEPPLPAPPSPTPPSPEPPSPEPPSPAPPSPEPPLPAPPSPAPPSPEPPTPPSPPPTCRADPYLLYYHSITESISGPVRTSEPESRVLGTATLWPDYPVPGSVTLELEAAPGGSWTPGAVVHWALMTPLQYLNDVFTVPLPDLEGPPCHEPTSLPHNRTLTANDVSFFRVFTLTYAQLGVVDDCNPRALFPVVRIDDGETSAWLAWDWVNPATGEGANICSGSPTAWGVGSFSLQSCPCQPPSPSPPPPAPPPCGTTILSQESEPVASGYLSGPIRDTANGWEVGAATVHVEPSGPDAVTLSLSLPLPAGTVIKYNFFDWVGYADAVFTLRPPALEGPNCHEPYDDSLLTAAT…	713	80+50	130
phC27a	Cre11.g480400.t1.1	Hanschen et al. 2016	11	3348540	3360615	MAWRWRAWTFTLLVLFATWPTARGQGASTPSDEYDAALPARSTSSFPWCQCVAYDCGCSPYQLQVLPPTRDGINVRSCFRVTYVGCDTTRKCCRGMLAAVDKLALETSAACSERGRVLGVTLNGRVHESWNPYVHGTGAELKIYNLQRSNATFAGVLVCVTTAPPCGWLNDLCVHGSGGPGGAGADGTSGGGGGMQNSCRYSLSDTPEATYCPVCAVRLPPAPPPPSPPGPNAPGRRRARPPPPEPTPPPSPTPSPAPTPCEVCLTLTLLPPPGAAAATQGGGLPFALTDPLCTDLESPMLSGLADAARAAGATISIPFARTACSTSYVPTATPMVLPYLRLCGAFRTASDGLRLQSWLAGPTTGLSAWLLQLTGGEACPASPGLSGYVITSLASSPAG…	2100	147+162+31+15	355
phC27b	Cre11.g480451.t1.1	Hanschen et al. 2016	11	3363251	3377643	MHENIRVPRRASWAGLVPWALVVVLLHLAAGGHAPSSLATEDASSLGDLDGAITSTNNGGRGLLGLTSRFPFCECLSYDCACSPYKVLMVSRNQTGDTARLCFRVAYVGCDTNTDCCRGMLAAVDKLTFETTAACANRSNLLGVTINGRPHASMLPYWHGKYTEVKIYSLRRNNATLSGSEICITTRAPCSTLQDFCSSTTFDGCRYSFADVPSATFCPICAMDKPLPPAPPSPPPPPPSPPPSPAPPSPEPPSPEPPSPVPPSPEPPSPEPPFPPPPSPEPPSPVPPSPMPPSPVPPRPPPPSPPPPCEVCFFLTIIPPTGYGASLPPSPLLSVSPPAARLPPGAINGTEVTGGGGSGGGGPGFSPSPPPAYGAGSPTAASTPPGPAASMVPPPSPFL…	3208	83+206+1041+146+214+41	1731
phC28	Cre17.g710300.t1.1	Hanschen et al. 2016	17	1905236	1908962	MLLAKGVAYPSYSCRTAELSADPNMGRRATTLLLALLCAGVASTFADRDLLQSPADNRFPPYGCVRDADASRFRLDPLYTVSGQTICFTAHVVPCNKKGSPCCDAKKVDFYKLELDVVPTCNRAITKVTVNGQRVLAPTFNFYGTDDQSAIYKLTGLNLTVANAEGAQICMTLDKNGPCPNLVDLCDNVSVPGSCRYAIVESGTCDCCPVGVTGLFPPPPSPPPPPPPSPPPPSPPPPSPPPPSPRPPRPPPPSPPPPPPPSPPPPSPSPPPSPRPPRPPPPSPPPPPPPSPPPPCVTCLVQTIIPPSYGLDGRPLFTFNKTICASQGEYIVDALNGQADFVGARMLSPWAVQSCTGKWDPNTNTYPTLRVCGTFFSVEDANLLQPWIDDEAPLDDFNA…	763	79+165	244
phC29	Cre09.g409901.t1.1	Hanschen et al. 2016	9	6848947	6852664	MRDYKALPLLRMGRLPLRLTKGCLLAVLFLGTLAWTGRAQDDPEAGISPILPGFEADVAALNRFPFCQCEDYRCSSSPYRLDSIDSPTGRTDELCYRINRVGCSQANPCCKMLLTSLGKVEFSVEKSCSTQYLGSWVNGVKRNSYFDTDFATGKIRVTPLGMTADSAANTTICLRFQPGATCGSYPALCGNTAGMCTYAVFESSNHRCCPICAQALPPPPPNAPAIRSPPPSPSPSPPPSPPPPPPPPPPPPPPPPPMPPPPPPPPPPPPPPPPPLPLLLPLPLPRLLLPRLPLPTPTPPAPRRPSATASPHS	313	104	104
phC3	Cre06.g278162.t1.1	Hanschen et al. 2016	6	3784323	3787464	MASKFLLLALLGALAALSVNAGRVDATGRTLLQAKPPRFPYCRCDDRLRVSPWRLKWDGYLQGVANNDWICFKVFTNFTDTRCTGPVDLQPACCKPNLSKLEFDVAPECKGTSNRALINKDVTDLKTIAVEVLDNGRAILRISKGLDYSAATLPAGGLSVCVNRLAGQCTISELFMSPTSVQYALFNSKNCCPTGVTGPGGPTFPTPVSAPPPPFRDRPVASPSPPPPPPPPPPPPPPPPPSPPPPPPPPPPPPPPPPPPSPPPPSPNPPPPKGPSPTPNNFPYCNCATYGRNSFPWRVSVLNKTTTATSERVCLKLYVDPAVAAVCNNKFGCCKQGLQKIELEATSTVPGQCKGSITPFTLTGTTDIKSSFLWDSTRPVLKFTKLDLSYDLGVAGAAL…	443	57	57
phC30	Cre07.g330750.t1.1	Hanschen et al. 2016	7	2665869	2670182	MGTSRRSLLAWAVAAVFLVATLQSARAQDSPPSAPPFDPNDPDAAYLFGFPFCRCSDYRCGAAPYKMLKASEETLPNGNYKVCFNFNDVGCPTNNACCTSLLQSVGKVEVQADKACKATIAASTFGNVSKAGSTFFDDEFSVGKVRITALNANRQMMDNSQLCLTIRPPCNSFDVFFQSSKVGGSGLYQYALFNSKADCCPTCVFAPSPPPPDVPAIRRPPPSPPPSPPPPPPPPPPPPPPPPPMPPPPPPPPPPPPPPPPPPSPPPPPPPPPPPPPPPPPPPMPPPPPPPPPPPPPPPPPPSPPPPPLISVGSFIAVSFAVAKASWTDTSLFPCPASKWDPSRPHLRLLAARLPDXXXXXXXXXXXXXXXXXXXXXXXXXXXXXXXXXXPPPPSPPPP…	950	102+45	147
phC31	Cre17.g729101.t1.1	Hanschen et al. 2016	17	4039840	4049045	MMAASGRSLALAGLALATLLAAGLPYAAARQPTDFPWCSCSTYDCDCSPYKISLTSQRKVNETITRFCFNVDSDPCDTSRACCRRMMANVDKLSFKIAPECQRVNIQRITFNGDRWNSWDTYSHDLGNGDKGYELKFYDIQSNSSAFPGTRICVNTISPCSSVFQICDGPNGLCEYSFADTPATTQKSLLDDIDAYSFDNNIQYADNGDLFFESSTCSSTEIAICGTFATAADSWLLQTWLFDNSKTYIRSLLCGRSVTDQDECTDKCTTAYQAYTVEMVVETGEGGSESCLSYSDENNCEKPRVRSSPPPRVRPPSPRPPSPKPSPSPSPSPSPSPSPSPSPSPSPSPSPSPSPSPSPSPSPSPSPSPSPSPSPSPSPSPSPSPSPSPSPSPSPSPSP…	878	403	403
phC32	Cre17.g705500.t1.1	Hanschen et al. 2016	17	1275409	1279411	MGTSKPCLLALTLAALALAASLQLGSAQPVYGDTPSPPFDPNDPDAAYLFGFPFCRCSDYRCGTTPYKMMRFSEQTLANGNYQVCFNFQDVGCQSGNACCDSILRLMDKIEIQAEKTCSKAVAAVTFAGVNEIGSTHFDTEFTVGKIRITGLNANRATMQSAQLCITIKPPCNSFDVFFDSDKLGQPGIYQYAVFNGGHDCCPVCVWQQPSSPSSPPPATVTPGIKRPPPSPPPPPPSPPPPPPPPPPPPPPPPPLPPPPPPPPPPPPPPPPPPSPXXXXXXXXXXXXXXXXXXXXXXXXXXXXXXXXXXPPPPPPPPPPPPPSPPPPPPPPPPPPPPPPPPPTPPPPPPPPPPPPPPPPPPSPPPPPSPVQPKNESICDCISVFEPNTRWRFRYRDSE…	855	119	119
phC4	Cre12.g549000.t1.2	Hanschen et al. 2016	12	8385044	8387899	MRSRLLWACGLAALLALAAMPAALGQKILPKFPYCRCVKKGPYALAKNVDEIDGYYCFEIEQVPCGKDKCCKMDLRKVEFDANVACRDTTKVTAMVNGLLPKQQPTWTAPQDTPAGKAVLKLSGLGLNITTAPGSLVCLKLDGQCNTLEKLCAVPKGQMPGICAISMFNTKDTCCPISQTGWPFPPPPPPPSPRPSPPPRPPPSPPPPRKPSPPPSPPASCPICITLNTTDVSLTREVCDNLADYVNSVWVDRSNATLLQPFSCSLATPSQVKICAVAEGKPDTVDFAGIAEDTYEIQLMLEELGLSCAFPSMMGTSMVYLVEYGTCRAVFTYVQDCKQPGPQPFPFCVCNRRPKATPFALDPTIRVKPGSSPRSTNYCWTATTVAPYDPTSPCGKTNE…	493	36	36
phC5	Cre05.g238650.t1.1	Hanschen et al. 2016	5	3034210	3039095	MSISAGHRRPWTIIAFNMRHTAVAVALLAFVAAATALDFPYAGCARALSKSKYSVKPVTTFPGTNTICWTVQYSDPQCANPSEPCCSADLHKLQLDVKQSCASGFRATATVNGQGTPSPTIYRPPNGGSDQYVLSIPGLGLDGASANGATICLTLTGGSCMTLASLTPSPVWSVALWDTAHQCCPVTRGASPPPPPPPSPPPPPPPSPPPPSPPPPSPPPPPPPSPPPPPPPSPPPPSPPPPSPPPPSPPPPSPPPPPPPSPPPPSPPPPSPPPPCKVCATWEAIAGPNVLVDDLNYFGDAYNCAVGKDVISELFAPYMEDGTIIAGTDSITCNGNKITACATMYSKERGAKMANELESMGNGLVTSVFGFTGDCPLALAGYSTGVTSTDQDCGIFKAG…	558	84	84
phC6	Cre17.g717950.t1.2	Hanschen et al. 2016	17	2698091	2702070	MRLTVAVLAILALAIGASAQQTGLYPSFPYCQCTKTPSAYRLSPTVTSTGAGTYCFTLSAKVPAGCTHKCCKADLKKIEFNVNDACDVFSPSLKATINGVRTKVAPAINKAQNGPVGSTTLVLTQLGLGLGNDGAQVCITLGLNKNGKGCTTLEELCVPPAGMPAGVCTAALFDSQNDCCPLSQANVPSPPPPSPPPPSPPPRCEVCAYIALVDPENNAPFPYAFSADECDSYAQTLIDDITAQAGDAGATIVTPFAKVDCQERLIKVCGEFFSNEEGALIQDWIGEQVSVWNDMVTGGQCPAYLSGYSVVTAVGGDGSDVNSLPMSCLNAFKSTACAPETVDFPKCQCTTKAFATPFAVKPMMSEMAGPSKDTTSYCFELAVVAPANPGSACGKTSTV…	500	15	15
phC7	Cre17.g718000.t1.1	Hanschen et al. 2016	17	2702311	2708092	MHLAGNLLLAALAATLWAASVSAQQTGLYPSFPYCQCTKTPSAYRLSPTVTSTGAGTYCFTLSANKVPAGCTHKCCKADLKKIEFNVNDACDVFSPSLKATINGMRTKVAPAINKAQNGPVGSTTLVLTQLGLGLGNDGAQVCITLGLNKNGKGCTTLEELCVPPAGMPAGVCTAALFDSQNDCCPLSQANVPSPPPPSPPPPSPPPPSPPPPSPAPPSPPPPSPPPPSPPPRCRVCTYIALISQPEVSAAYAFTADQCAQVSDVIAADITAQAESVGATIVSDFALVSCQGQQIKVCGEFFSNEEGALLQGFVSEQVAIWRELVAGETCPRDLAGYTVVAAVGGDGASVQDLPQSCLSASDNKACALESPPPPPPPPPPPPPPSPPPPSPPPPSPPPP…	749	40+74	114
phC8	Cre17.g717850.t1.1	Hanschen et al. 2016	17	2685191	2692102	MTSRMTSSLAFLALTLLAVGASAQPQSGLYTNFPFCKCIKTPTAYRLSPTVKSVGSSTYCFTLNVNVPAGCNNYCCNKADLKKIEINAFQACDVFSPPVKATINGVPTKVAPAFTTPKDGPVGSATLVLTQLGLGLASDGAEICITLGLNKNGKGCTTLEELCVPPAGMPAGVCTAALFDSQNDCCPLSQANVPSPPPPSPPPPSPPPPSPPPPSPPPPSPPPPSPPPPPPPPSPPPPSPPPPPPPSPPPPPPPSPPPPPPPSPPPPSPPPPSPPPPSPPPPSPPPPSPPPPSPPPPSPPPPSPPPPCEVCVYLTLVPPANDPFQYRFDAATCDDAATAISQDIELLAEDLQARISVPFTLTECTETSIKVCGEFFSNEDGALLEPDIQNIYLDQWLQI…	603	114	114
phC9	Cre06.g299150.t1.1	Hanschen et al. 2016	6	7361752	7368597	MGRQSGASGLRALAVVALSSFLLASGAAAAQSGLYTQFPFCKCIKSPSAYKLADVVVAKGNSQYCFRLSAKVPAGCNNYCCNKADLKKIEFNVNTACDVFGSVVKATVNGVPTKVGTSFDQPTDGPAGSTVLRLTQLGLGLWSDGAEICITLAPGKNAPGCTTLEQLCVPPAGLPKGVCSAALFDSQNDCCPLSTPGIPSPPPPRPPPPSPPPPSPPPPSPPPPSPPPPSPPPPSPPPPPPPPRPPPPSPPPPPPPRPPPPSPPPPPPPVCQACISFNIDSYPVFVWSDFLKRYYFNQGRCLDSLGLISGDVNDAAEQMGIKLAQGFSYTPASCGSSRWTTCGSFHTEADAKKMQDWATQQANNVWMESITGPACSSYWHGWQFSITSANSQCFSMGAS…	572	71	71

## Sheet: References
References
Ender, F., Godl, K., Wenzl, S. and Sumper, M. (2002) Evidence for autocatalytic cross-linking of hydroxyproline-rich glycoproteins during extracellular matrix assembly in Volvox. Plant Cell 14, 1147-1160.
Ertl, H., Mengele, R., Wenzl, S., Engel, J. and Sumper, M. (1989) The extracellular matrix of Volvox carteri: molecular structure of the cellular compartment. J. Cell Biol. 109, 3493-3501.
Godl, K., Hallmann, A., Rappel, A. and Sumper, M. (1995) Pherophorins: a family of extracellular matrix glycoproteins from Volvox structurally related to the sex-inducing pheromone. Planta 196, 781-787.
Godl, K., Hallmann, A., Wenzl, S. and Sumper, M. (1997) Differential targeting of closely related ECM glycoproteins: the pherophorin family from Volvox. EMBO J. 16, 25-34.
Hallmann, A. (2003) Extracellular matrix and sex-inducing pheromone in Volvox. Int. Rev. Cytol. 227, 131-182.
Hallmann, A. (2006) The pherophorins: common, versatile building blocks in the evolution of extracellular matrix architecture in Volvocales. Plant J. 45, 292-307.
Hanschen, E.R., Marriage, T.N., Ferris, P.J., Hamaji, T., Toyoda, A., Fujiyama, A., Neme, R., Noguchi, H., Minakuchi, Y., Suzuki, M., Kawai-Toyooka, H., Smith, D.R., Sparks, H., Anderson, J., Bakaric, R., Luria, V., Karger, A., Kirschner, M.W., Durand, P.M., Michod, R.E., Nozaki, H. and Olson, B.J. (2016). The Gonium pectorale genome demonstrates co-option of cell cycle regulation during the evol…
Holst, O., Christoffel, V., Fründ, R., Moll, H. and Sumper, M. (1989) A phosphodiester bridge between two arabinose residues as a structural element of an extracellular glycoprotein of Volvox carteri. Eur. J. Biochem. 181, 345-350.
Mengele, R. and Sumper, M. (1992) Gulose as a constituent of a glycoprotein. FEBS Lett. 298, 14-16.
Nematollahi, G., Kianianmomeni, A. and Hallmann, A. (2006) Quantitative analysis of cell-type specific gene expression in the green alga Volvox carteri. BMC Genomics 7, 321.
Prochnik, S.E., Umen, J., Nedelcu, A.M., Hallmann, A., Miller, S.M., Nishii, I., Ferris, P., Kuo, A., Mitros, T., Fritz-Laylin, L.K., Hellsten, U., Chapman, J., Simakov, O., Rensing, S.A., Terry, A., Pangilinan, J., Kapitonov, V., Jurka, J., Salamov, A., Shapiro, H., Schmutz, J., Grimwood, J., Lindquist, E., Lucas, S., Grigoriev, I.V., Schmitt, R., Kirk, D. and Rokhsar, D.S. (2010). Genomic analy…
Sumper, M., Berg, E., Wenzl, S. and Godl, K. (1993) How a sex pheromone might act at a concentration below 10-16 M. EMBO J. 12, 831-836.
Sumper, M. and Hallmann, A. (1998) Biochemistry of the extracellular matrix of Volvox. Int. Rev. Cytol. 180, 51-85.
Tam, L.W. and Kirk, D.L. (1991). Identification of cell-type-specific genes of Volvox carteri and characterization of their expression during the asexual life cycle. Dev. Biol. 145, 51-66.
Tam, L. W. and Kirk, D. L. (1991) The program for cellular differentiation in Volvox carteri as revealed by molecular analysis of development in a gonidialess/somatic regenerator mutant. Development 112, 571-580.
Tam, L.W., Stamer, K.A. and Kirk, D.L. (1991). Early and late gene expression programs in developing somatic cells of Volvox carteri. Dev. Biol. 145, 67-76.
von der Heyde, B., and Hallmann, A. (2020). Targeted migration of pherophorin-S indicates extensive extracellular matrix dynamics in Volvox carteri. Plant J. 103, 2301-2317.
